# Supplementary material for: The primate gut mycobiome-bacteriome interface is impacted by environmental and subsistence factors
Source: PubMed Central journal article supplement (PMC8930997; doi:10.1038/s41522-022-00274-3), 2022-03-17
Supplement: 41522_2022_274_MOESM1_ESM.pdf [file 41522_2022_274_MOESM1_ESM.pdf]

Supplementary Table 1. Taxonomic signatures in each primate group were identified using indicator species analysis.

| Family                                               | group                              | indval | pvalue |
|------------------------------------------------------|------------------------------------|--------|--------|
| Basidiomycota.Russulaceae                            | BaAka-human                        | 0.48   | 0.001  |
| Basidiomycota.Trichosporonaceae                      | BaAka-human                        | 0.32   | 0.017  |
| Basidiomycota.Polyporaceae                           | BaAka-human                        | 0.31   | 0.004  |
| Ascomycota.Pichiaceae                                | Bantu-Human                        | 0.59   | 0.001  |
| Basidiomycota.Agaricostilbaceae                      | Bantu-Human                        | 0.56   | 0.001  |
| Ascomycota.unassigned.Saccharomycetales              | Bantu-Human                        | 0.51   | 0.001  |
| Basidiomycota.Wallemiaceae                           | Bantu-Human                        | 0.45   | 0.002  |
| Ascomycota.Ascodesmidaceae                           | Bantu-Human                        | 0.38   | 0.003  |
| Ascomycota.unassigned.Capnodiales                    | Captive chimps-Hodonin             | 0.49   | 0.007  |
| Ascomycota.Niessliaceae                              | Captive chimps-Hodonin             | 0.33   | 0.007  |
| Ascomycota.Leptosphaeriaceae                         | Captive chimps-Hodonin             | 0.33   | 0.019  |
| Ascomycota.Arachnomycetaceae                         | Captive chimps-Hodonin             | 0.32   | 0.013  |
| Basidiomycota.Fomitopsidaceae                        | Captive chimps-Hodonin             | 0.31   | 0.004  |
| Basidiomycota.Holtermanniales_fam_Incertae_se<br>dis | Captive chimps-Hodonin             | 0.31   | 0.022  |
| Ascomycota.Magnaporthaceae                           | Captive chimps-Hodonin             | 0.31   | 0.013  |
| Basidiomycota.Erythrobasidiaceae                     | Captive chimps-Hodonin             | 0.31   | 0.017  |
| Basidiomycota.Sporidiobolaceae                       | Captive chimps-Ostrava             | 0.46   | 0.004  |
| Ascomycota.Aureobasidiaceae                          | Captive chimps-Ostrava             | 0.41   | 0.007  |
| Ascomycota.Pleosporaceae                             | Captive chimps-Ostrava             | 0.33   | 0.018  |
| Basidiomycota.Filobasidiaceae                        | Captive chimps-Ostrava             | 0.30   | 0.017  |
| Ascomycota.Lasiosphaeriaceae                         | Captive western lowland<br>gorilla | 0.47   | 0.003  |
| Ascomycota.Sordariaceae                              | Captive western lowland<br>gorilla | 0.42   | 0.007  |
| Mucoromycota.Pilobolaceae                            | Captive western lowland<br>gorilla | 0.33   | 0.014  |
| Ascomycota.Aplosporellaceae                          | Chimpanzee                         | 0.63   | 0.001  |
| Ascomycota.unassigned.Xylariales                     | Chimpanzee                         | 0.59   | 0.003  |
| Ascomycota.Chaetothyriales_fam_Incertae_sedis        | Chimpanzee                         | 0.56   | 0.002  |
| Ascomycota.Trichosphaeriaceae                        | Chimpanzee                         | 0.52   | 0.002  |
| Ascomycota.Botryosphaeriaceae                        | Chimpanzee                         | 0.51   | 0.006  |
| Ascomycota.Periconiaceae                             | Chimpanzee                         | 0.47   | 0.007  |
| Ascomycota.Sporocadaceae                             | Chimpanzee                         | 0.46   | 0.003  |
| Ascomycota.Coniothyriaceae                           | Chimpanzee                         | 0.45   | 0.003  |
| Basidiomycota.Rhynchogastremataceae                  | Chimpanzee                         | 0.45   | 0.001  |
| Ascomycota.unassigned.Dothideomycetes                | Chimpanzee                         | 0.44   | 0.007  |
| Ascomycota.Corynesporascaceae                        | Chimpanzee                         | 0.43   | 0.001  |
| Basidiomycota.Tremellaceae                           | Chimpanzee                         | 0.42   | 0.002  |
| Ascomycota.Cladosporiaceae                           | Chimpanzee                         | 0.38   | 0.012  |
| Ascomycota.Mycosphaerellaceae                        | Chimpanzee                         | 0.38   | 0.01   |
| Ascomycota.unassigned.Sordariomycetes                | Chimpanzee                         | 0.36   | 0.05   |

|                                                 |                         |      |       |
|-------------------------------------------------|-------------------------|------|-------|
| Ascomycota.unassigned.Lecanorales               | Chimpanzee              | 0.34 | 0.002 |
| Ascomycota.unassigned.Pleosporales              | Chimpanzee              | 0.32 | 0.033 |
| Basidiomycota.Bulleribasidiaceae                | Chimpanzee              | 0.30 | 0.01  |
| Basidiomycota.Psathyrellaceae                   | Mangabey                | 0.55 | 0.002 |
| Ascomycota.Lophiostomataceae                    | Mangabey                | 0.51 | 0.003 |
| Ascomycota.Capnodiaceae                         | Mangabey                | 0.47 | 0.001 |
| Ascomycota.Hypocreales_fam_Incertae_sedis       | Mangabey                | 0.45 | 0.003 |
| Ascomycota.unassigned.Hypocreales               | Mangabey                | 0.42 | 0.006 |
| Basidiomycota.Agaricaceae                       | Mangabey                | 0.40 | 0.016 |
| Ascomycota.Saccharomycetales_fam_Incertae_sedis | Mangabey                | 0.40 | 0.007 |
| Basidiomycota.Hydodontaceae                     | Mangabey                | 0.40 | 0.004 |
| Ascomycota.Cordycipitaceae                      | Mangabey                | 0.40 | 0.018 |
| Ascomycota.Sympoventuriaceae                    | Mangabey                | 0.38 | 0.011 |
| Ascomycota.Elaphomycetaceae                     | Mangabey                | 0.35 | 0.002 |
| Ascomycota.Saccharomycetaceae                   | USA-Human               | 0.30 | 0.044 |
| Ascomycota.Saccharomycodaceae                   | Western lowland gorilla | 0.49 | 0.004 |
| Ascomycota.Didymosphaeriaceae                   | Western lowland gorilla | 0.43 | 0.036 |
| Ascomycota.Debaryomycetaceae                    | Western lowland gorilla | 0.43 | 0.009 |
| Basidiomycota.unassigned.Tremellales            | Western lowland gorilla | 0.36 | 0.015 |
| Ascomycota.Archaeorhizomycetaceae               | Western lowland gorilla | 0.35 | 0.001 |
| Mucoromycota.unidentified                       | Western lowland gorilla | 0.32 | 0.01  |

Supplementary Table2. Sheet1. Key taxa in BaAka-Human identified based on the network hub score.

| ASV                               | Hub Score   | Taxa                                                                                                                |
|-----------------------------------|-------------|---------------------------------------------------------------------------------------------------------------------|
| a5df85791aea1c3c93996213e511e798  | 1           | k_Fungi;p_Basidiomycota;c_Agaricomycetes;o_Russulales;f_Russulaceae;g_Lactarius                                     |
| f86825cfba011a54bc8799a74662a8a8  | 0.225544475 | k_Bacteria; p_Firmicutes; c_Clostridia; o_Clostridiales; f_Lachnospiraceae                                          |
| f70335502c78e0a62f836a8ff964ff66  | 0.194884143 | k_Bacteria; p_Bacteroidetes; c_Bacteroidia; o_Bacteroidales; f_[Paraprevotellaceae]; g_; s_                         |
| X1c8b530be4fb53dd9556a1cbf028f3f2 | 0.178331453 | k_Fungi;p_Ascomycota;c_Dothideomycetes;o_Capnodiales;f_Cladosporiaceae;g_Cladosporium;s_Cladosporium_sphaerospermum |
| b2c9343b51ebe2282da3eda2fafb8693  | 0.168864018 | k_Bacteria; p_Firmicutes; c_Clostridia; o_Clostridiales; f_Lachnospiraceae; g_Oribacterium; s_                      |
| X2b67477b5db889cc9274e8eed8e81bd0 | 0.168864018 | k_Bacteria; p_Bacteroidetes; c_Bacteroidia; o_Bacteroidales; f_Prevotellaceae; g_Prevotella; s_                     |
| e2f5328726e4b0bb7e365a0c1d9e85b7  | 0.168864018 | k_Bacteria; p_Firmicutes; c_Clostridia; o_Clostridiales; f_Ruminococcaceae; g_; s_                                  |
| X24284cec3ba6a25cbdeb7322cc8450f8 | 0.168864018 | k_Bacteria; p_Verrucomicrobia; c_Verruco-5; o_WCHB1-41; f_RFP12; g_; s_                                             |
| a55a010c9525ce2943a553dca1421b1c  | 0.168864018 | k_Bacteria; p_Firmicutes; c_Clostridia; o_Clostridiales; f_Lachnospiraceae; g_Anaerostipes; s_                      |
| df14354ec277348c54d0c9dd49eb4da0  | 0.168864018 | k_Bacteria; p_Firmicutes; c_Clostridia; o_Clostridiales; f_Ruminococcaceae; g_Ruminococcus; s_                      |
| X79a2af8f3676378c234767c28b52a70f | 0.157325943 | k_Fungi;p_Basidiomycota;c_Agaricomycetes;o_Russulales;f_Russulaceae;g_Lactarius;s_unidentified                      |
| X406879750b15643051eadb1d747dafd5 | 0.154089221 | k_Fungi;p_Ascomycota;c_Sordariomycetes;o_Microascales;f_Microascaleaceae;g_Scedosporium;s_Scedosporium_prolificans  |
| X49153948ebd600987669e92e9934960a | 0.030113766 | k_Bacteria; p_Firmicutes; c_Clostridia; o_Clostridiales; f_Lachnospiraceae; g_; s_                                  |
| c139024f4ea8e9e81fa0e7a36a10a36b  | 0.026020125 | k_Bacteria; p_Bacteroidetes; c_Bacteroidia; o_Bacteroidales; f_; g_; s_                                             |
| X6916d386b67ae389d75219a14bf80740 | 1.07E-15    | k_Fungi;p_Ascomycota;c_Dothideomycetes;o_Capnodiales;f_Cladosporiaceae;g_Cladosporium                               |
| X0a7fe3595e40caefecb26f55ecf526d  | 2.31E-16    | k_Fungi;p_Ascomycota;c_Dothideomycetes;o_Capnodiales;f_Cladosporiaceae;g_Cladosporium                               |
| X274d44a105684512d6df0a983a5b6663 | 1.64E-16    | k_Bacteria; p_Firmicutes; c_Clostridia; o_Clostridiales; f_Clostridiaceae; g_02d06; s_                              |

|                                   |          |                                                                                                        |
|-----------------------------------|----------|--------------------------------------------------------------------------------------------------------|
| X73cd65bf815e718c410a590cf1e58392 | 1.31E-16 | k_Bacteria; p_Firmicutes; c_Clostridia; o_Clostridiales; f_; g_; s_                                    |
| d54f71f28a2092111fd16b901d39254c  | 1.31E-16 | k_Bacteria; p_Firmicutes; c_Clostridia; o_Clostridiales; f_[Mogibacteriaceae]; g_; s_                  |
| b66a7645cdaca2472b4a6371220803b1  | 1.31E-16 | k_Bacteria; p_Tenericutes; c_Mollicutes; o_RF39; f_; g_; s_                                            |
| cd86e3c16167d3db6cc1d8ae8b8b8348  | 1.31E-16 | k_Bacteria; p_Firmicutes; c_Clostridia; o_Clostridiales                                                |
| X0b4aeb45916a24fd10e3655fe6481966 | 1.31E-16 | k_Bacteria; p_Firmicutes; c_Clostridia; o_Clostridiales; f_Christensenellaceae; g_; s_                 |
| cd7b0604bdc8b4cf6c69e0a150266791  | 9.63E-17 | k_Fungi; p_Basidiomycota; c_Agaricomycetes; o_Agaricales; f_Lyophyllaceae; g_Termitomyces              |
| X5ef58296652d5359831628286945e59f | 9.63E-17 | k_Fungi; p_Ascomycota; c_Saccharomycetes; o_Saccharomycetales                                          |
| a9e2afd4297fd011649a216315249232  | 3.01E-17 | k_Bacteria; p_Bacteroidetes; c_Bacteroidia; o_Bacteroidales; f_Prevotellaceae; g_; s_                  |
| X69f869ff6af6e63d8debb202e7eb73e7 | 3.01E-17 | k_Bacteria; p_Firmicutes; c_Clostridia; o_Clostridiales; f_Ruminococcaceae; g_; s_                     |
| X421cbd1d71d34704c6d53377261e213c | 1.11E-17 | k_Bacteria; p_Firmicutes; c_Clostridia; o_Clostridiales; f_Lachnospiraceae; g_Anaerostipes; s_         |
| X05760923db45c20388aeb2ff51ac3f2e | 1.11E-17 | k_Bacteria; p_Tenericutes; c_Mollicutes; o_RF39; f_; g_; s_                                            |
| ab149525cad479f6599c7923acc49691  | 1.11E-17 | k_Bacteria; p_Firmicutes; c_Clostridia; o_Clostridiales; f_; g_; s_                                    |
| e671233da36fe99a7ce1b39ccbdd2c0   | 1.11E-17 | k_Bacteria; p_Firmicutes; c_Clostridia; o_Clostridiales; f_Ruminococcaceae; g_; s_                     |
| X7c104699e795bbf45f90fceac906e6b4 | 1.11E-17 | k_Bacteria; p_Firmicutes; c_Clostridia; o_Clostridiales; f_; g_; s_                                    |
| X7717c98118439762317647199c6005f7 | 1.11E-17 | k_Bacteria; p_Firmicutes; c_Clostridia; o_Clostridiales; f_Ruminococcaceae; g_; s_                     |
| d76d59ec71de0e3b22da0c9cd564d41a  | 1.11E-17 | k_Bacteria; p_Firmicutes; c_Clostridia; o_Clostridiales; f_Lachnospiraceae                             |
| X45c80843dac191f771b11018ff90d94c | 1.11E-17 | k_Bacteria; p_Firmicutes; c_Clostridia; o_Clostridiales; f_Ruminococcaceae; g_Ruminococcus; s_callidus |
| d71feb1923fa288790187009e8efa6d3  | 1.11E-17 | k_Bacteria; p_Firmicutes; c_Clostridia; o_Clostridiales; f_Lachnospiraceae; g_Blautia; s_              |

|                                          |              |                                                                                              |
|------------------------------------------|--------------|----------------------------------------------------------------------------------------------|
| c6c3ab4e828fb40d<br>6e05967b7aac933<br>8 | 1.11E-<br>17 | k_Bacteria; p_Firmicutes; c_Clostridia; o_Clostridiales;<br>f_Lachnospiraceae; g_Blautia; s_ |
|------------------------------------------|--------------|----------------------------------------------------------------------------------------------|

Supplementary Table2. Sheet2. Key taxa in Bantu-Human identified based on the network hub score.

| ASV                                   | Hub Score       | Taxa                                                                                                                      |
|---------------------------------------|-----------------|---------------------------------------------------------------------------------------------------------------------------|
| X0b24831e597f08fae<br>dac938088911adb | 1               | k_Fungi;p_Ascomycota;c_Eurotiomycetes;o_Eurotiales;f_Aspergil<br>laceae;g_Aspergillus;s_Aspergillus_penicillioides        |
| X7d2997b35503bc54<br>e9ef5a63975fed39 | 0.2923<br>90685 | k_Fungi;p_Basidiomycota;c_Tremellomycetes;o_Trichosporonale<br>s;f_Trichosporonaceae;g_Trichosporon;s_Trichosporon_asahii |
| X5ef58296652d5359<br>831628286945e59f | 0.2755<br>05639 | k_Fungi;p_Ascomycota;c_Saccharomycetes;o_Saccharomycetales                                                                |
| b2c9343b51ebe2282<br>da3eda2fafb8693  | 0.2445<br>33307 | k_Bacteria; p_Firmicutes; c_Clostridia; o_Clostridiales;<br>f_Lachnospiraceae; g_Oribacterium; s__                        |
| X2ed442f2b4b06a70<br>1ea21c178567a128 | 0.1987<br>81978 | k_Fungi;p_Ascomycota;c_Eurotiomycetes;o_Eurotiales;f_Aspergil<br>laceae;g_Aspergillus;s_unidentified                      |
| X7a6a394fe7285b50<br>ee54b56f316a3944 | 0.1765<br>48051 | k_Bacteria; p_Bacteroidetes; c_Bacteroidia; o_Bacteroidales;<br>f_Rikenellaceae; g__; s__                                 |
| X43119e5f1eb41e9ee<br>1776d7a6504126f | 0.1384<br>14168 | k_Bacteria; p_Firmicutes; c_Clostridia; o_Clostridiales; f__; g__; s__                                                    |
| X9272b77aef548a2e<br>fc2b1917e111018  | 0.1384<br>14168 | k_Bacteria; p_Firmicutes; c_Clostridia; o_Clostridiales;<br>f_Ruminococcaceae; g__; s__                                   |
| fe095885b690e99ffc<br>a72514e3fcf9    | 0.1384<br>14168 | k_Bacteria; p_Firmicutes; c_Clostridia; o_Clostridiales; f__; g__; s__                                                    |
| b53e06f05e66b10fae<br>9bf6eb67365f0e  | 0.1384<br>14168 | k_Bacteria; p_Bacteroidetes; c_Bacteroidia; o_Bacteroidales;<br>f_Prevotellaceae; g_Prevotella; s_stercorea               |
| a2217cc8df6a4c209a<br>ee7f31a304c2b0  | 0.1384<br>14168 | k_Bacteria; p_Firmicutes; c_Clostridia; o_Clostridiales;<br>f_Ruminococcaceae; g__; s__                                   |
| X54175402c3089251<br>0113a18348858786 | 0.1384<br>14168 | k_Bacteria; p_Firmicutes; c_Erysipelotrichi; o_Erysipelotrichales;<br>f_Erysipelotrichaceae; g__; s__                     |
| c0a8f5074b73b0648<br>d1a21b1f3d8ffaf  | 0.1384<br>14168 | k_Bacteria; p_Firmicutes; c_Clostridia; o_Clostridiales;<br>f_Clostridiaceae; g_02d06; s__                                |
| deb90060cd7e33d6b<br>3e583a968e4a11e  | 0.1384<br>14168 | k_Bacteria; p_Bacteroidetes; c_Bacteroidia; o_Bacteroidales;<br>f_Prevotellaceae; g_Prevotella; s_copri                   |
| X4bd01f9039837548<br>0101204bbcdd2ceb | 0.0404<br>71013 | k_Bacteria; p_Firmicutes; c_Clostridia; o_Clostridiales;<br>f_Ruminococcaceae                                             |
| f55d22a8e61d493b7f<br>4c5e3f09326add  | 0.0404<br>71013 | k_Bacteria; p_Firmicutes; c_Clostridia; o_Clostridiales;<br>f_Lachnospiraceae; g_Butyrvibrio; s_crossotus                 |
| a0d16414f352e45bb<br>94592a4cfdd6c37  | 0.0404<br>71013 | k_Bacteria; p_Cyanobacteria; c_4C0d-2; o_YS2; f__; g__; s__                                                               |
| X6c324279c1fc2965e<br>594486ac26b0548 | 0.0404<br>71013 | k_Bacteria; p_Firmicutes; c_Clostridia; o_Clostridiales;<br>f_Lachnospiraceae; g_Coproccoccus; s_eutactus                 |
| X96cf4779be686036f<br>92ee15e58b72d52 | 0.0404<br>71013 | k_Bacteria; p_Firmicutes; c_Clostridia; o_Clostridiales;<br>f_Veillonellaceae; g_Phascolarctobacterium; s__               |
| b0b24b383b2d7d47b<br>8858b31c76b40ee  | 0.0317<br>69773 | k_Bacteria; p_Firmicutes; c_Clostridia; o_Clostridiales;<br>f_Ruminococcaceae; g__; s__                                   |
| X87f1f89372c1542c1<br>0504ef404c7ba31 | 0.0307<br>44906 | k_Fungi;p_Ascomycota;c_Saccharomycetes;o_Saccharomycetales                                                                |
| c56fc2972887d4e6f0<br>cadcd072640003  | 0.0275<br>14242 | k_Bacteria; p_Firmicutes; c_Clostridia; o_Clostridiales;<br>f_Ruminococcaceae; g__; s__                                   |
| X8f27e96468755ca1<br>44a3b4edca1d4c4e | 0.0108<br>459   | k_Fungi;p_Basidiomycota;c_Tremellomycetes;o_Trichosporonale<br>s;f_Trichosporonaceae;g_Trichosporon                       |
| X6aed27fe0a1493fe2<br>86a0d9dbd827347 | 0.0068<br>83406 | k_Fungi;p_Ascomycota;c_Saccharomycetes;o_Saccharomycetales                                                                |
| X93f0debe0549ef4b2<br>66405e4e356d8f1 | 0.0067<br>09518 | k_Bacteria; p_Actinobacteria; c_Actinobacteria;<br>o_Actinomycetales; f_Corynebacteriaceae; g_Corynebacterium             |
| ec6732c2e0d4cf64b3<br>d0350e7fe3defb  | 0.0042<br>55531 | k_Bacteria; p_Firmicutes; c_Clostridia; o_Clostridiales;<br>f_Lachnospiraceae; g_Roseburia                                |
| a1c8a4289a5c93d48<br>a8c7cc17815ba8a  | 0.0042<br>55531 | k_Bacteria; p_Firmicutes; c_Erysipelotrichi; o_Erysipelotrichales;<br>f_Erysipelotrichaceae; g_Bulleidia; s_p-1630-c5     |

|                                   |                 |                                                                                                               |
|-----------------------------------|-----------------|---------------------------------------------------------------------------------------------------------------|
| X274c6b6158831a35ed9277540b91787f | 0.0023<br>98956 | k_Fungi;p_Ascomycota;c_Eurotiomycetes;o_Eurotiales;f_Aspergillaceae;g_Aspergillus;s_unidentified              |
| X3114d42cc9f862a2a18d7e5efde7fa9b | 0.0018<br>33276 | k_Bacteria; p_Actinobacteria; c_Coriobacteriia; o_Coriobacteriales; f_Coriobacteriaceae; g_Slackia; s_        |
| X2e4f2b53b856c4def6d021d01f5abb70 | 0.0018<br>33276 | k_Bacteria; p_Firmicutes; c_Clostridia; o_Clostridiales; f_Lachnospiraceae; g_[Ruminococcus]; s_gnavus        |
| X26b0fd3cb46859713999bbf58faea436 | 0.0016<br>97068 | k_Archaea; p_Euryarchaeota; c_Thermoplasmata; o_E2; f_[Methanomassiliococcaceae]; g_vadinCA11; s_             |
| X86d2b555791a721b710afe3154c88b62 | 0.0015<br>01226 | k_Bacteria; p_Firmicutes; c_Clostridia; o_Clostridiales; f_; g_; s_                                           |
| X5e6805e860c751a55bd7ce70ca4b7534 | 0.0015<br>01226 | k_Bacteria; p_Firmicutes; c_Clostridia; o_Clostridiales; f_Ruminococcaceae; g_; s_                            |
| fb428d07d03e32be0b85eached10df0a  | 0.0015<br>01226 | k_Bacteria; p_Firmicutes; c_Clostridia; o_Clostridiales; f_Lachnospiraceae; g_Coproccoccus; s_eutactus        |
| X40adacc1c9e72c3b716624f295496e6c | 0.0014<br>14899 | k_Fungi;p_Ascomycota;c_Saccharomycetes;o_Saccharomycetales; f_Pichiaceae;g_Pichia;s_Pichia_norvegensis        |
| bff475e3d60f57d6e4fbe246643e89de  | 0.0009<br>52761 | k_Bacteria; p_Firmicutes; c_Clostridia; o_Clostridiales; f_Ruminococcaceae; g_; s_                            |
| X6348584315770e0d041c8543e15394f1 | 0.0009<br>52761 | k_Bacteria; p_Firmicutes; c_Clostridia; o_Clostridiales; f_Ruminococcaceae                                    |
| d084475ce17d67557615ecfb105797ab  | 0.0009<br>52761 | k_Bacteria; p_Firmicutes; c_Clostridia; o_Clostridiales; f_Ruminococcaceae; g_; s_                            |
| X5654714fd17021f92582b02756943a86 | 0.0009<br>52761 | k_Bacteria; p_Firmicutes; c_Clostridia; o_Clostridiales; f_; g_; s_                                           |
| b7bb03f41b2044386d4c609b1085f722  | 0.0002<br>47956 | k_Bacteria; p_Verrucomicrobia; c_Verruco-5; o_WCHB1-41; f_RFP12; g_; s_                                       |
| X4f480409cf34da6fb985eaa1cf33a65b | 0.0002<br>17501 | k_Bacteria; p_Firmicutes; c_Clostridia; o_Clostridiales; f_Lachnospiraceae                                    |
| X2343d35d2595e2249b6b0788c291563a | 0.0001<br>98116 | k_Fungi;p_Ascomycota;c_Saccharomycetes;o_Saccharomycetales                                                    |
| X114a0bce87e416d7710a2ea64c381af6 | 0.0001<br>78388 | k_Fungi;p_Ascomycota;c_Eurotiomycetes;o_Eurotiales;f_Aspergillaceae;g_Aspergillus;s_unidentified              |
| X93b258110943cf1f460fcc29f9914873 | 0.0001<br>56478 | k_Fungi                                                                                                       |
| X923fed1e3a5c67f886eb287b585a924a | 2.74E-05        | k_Bacteria; p_Firmicutes; c_Clostridia; o_Clostridiales; f_Lachnospiraceae; g_Coproccoccus; s_                |
| X545f2b8b71aad3c042a8f20fe0e25df2 | 2.74E-05        | k_Bacteria; p_Firmicutes; c_Clostridia; o_Clostridiales; f_Ruminococcaceae; g_Faecalibacterium; s_prausnitzii |
| fea7f04af92d6da8eef36144b3589ad9  | 2.47E-05        | k_Bacteria; p_Bacteroidetes; c_Bacteroidia; o_Bacteroidales; f_Porphyrmonadaceae; g_Parabacteroides; s_       |
| f663dd604f793f22ce20452b09494608  | 2.17E-05        | k_Bacteria; p_Firmicutes; c_Clostridia; o_Clostridiales; f_Ruminococcaceae; g_; s_                            |
| X9e42f44aaff2b3eeb6336925728fd29f | 1.63E-17        | k_Fungi;p_Ascomycota;c_Saccharomycetes;o_Saccharomycetales                                                    |
| d61afa93b12293a3087aa4f0f2d73164  | 1.63E-17        | k_Fungi;p_Mucoromycota;c_Mucoromycetes;o_Mucorales;f_Rhizopodaceae;g_Rhizopus;s_Rhizopus_arrhizus             |
| c48070f3061b086b60ff32f77e0002fa  | 3.65E-18        | k_Bacteria; p_Firmicutes; c_Clostridia; o_Clostridiales; f_Ruminococcaceae; g_Faecalibacterium; s_prausnitzii |
| c66ec67719e54d2cb0afc3154b3c23af  | 3.65E-18        | k_Bacteria; p_Firmicutes; c_Clostridia; o_Clostridiales; f_; g_; s_                                           |
| c3337d877a02fb500fc37be8aa4fd234  | 3.65E-18        | k_Bacteria; p_Firmicutes; c_Clostridia; o_Clostridiales; f_[Mogibacteriaceae]; g_; s_                         |
| X0501d0de95c0ade37e2eb0c56cf6df87 | 3.65E-18        | k_Fungi                                                                                                       |
| X45764da73ff78cb08974dcef2aef320  | 3.65E-18        | k_Fungi;p_Ascomycota;c_Saccharomycetes;o_Saccharomycetales; f_Saccharomycetaceae;g_Saccharomyces              |
| cbff7dcda657642a9c4e949a23aadfe3  | 3.65E-18        | k_Fungi;p_Ascomycota;c_Eurotiomycetes;o_Eurotiales;f_Aspergillaceae;g_Aspergillus;s_Aspergillus_brasiliensis  |

|                                       |              |                                                                                                                             |
|---------------------------------------|--------------|-----------------------------------------------------------------------------------------------------------------------------|
| X35cbb315e019e0a8<br>768d4b73862df415 | 2.30E-<br>18 | k_Bacteria; p_Actinobacteria; c_Coriobacteriia;<br>o_Coriobacteriales; f_Coriobacteriaceae; g_Collinsella;<br>s_aerofaciens |
| X288359d621a383c1<br>e46f0c0418660242 | 1.15E-<br>18 | k_Fungi;p_Ascomycota;c_Dothideomycetes;o_Botryosphaeriales;f<br>_Botryosphaeriaceae;g_Lasiodiplodia                         |
| X980d3ec25be6051a<br>ca44c0a6c4fbd6bb | 1.15E-<br>18 | k_Fungi                                                                                                                     |



Supplementary Table2. Sheet3. Key taxa in Captive Chimps-Ostrava identified based on the network hub score.

| ASV                                | HubS core           | Taxa                                                                                                                  |
|------------------------------------|---------------------|-----------------------------------------------------------------------------------------------------------------------|
| X842b231d632137e161df6d969797c2b9  | 1                   | k_Fungi                                                                                                               |
| X429cf0d4d6dbbee8b629acba2252d194a | 0.508<br>7631<br>97 | k_Fungi;p_Ascomycota;c_Eurotiomycetes;o_Eurotiales;f_Aspergillaceae;g_Penicillium;s_unidentified                      |
| b54a583c333aa96b10152106510ca6cd   | 0.320<br>8566<br>26 | k_Fungi                                                                                                               |
| X799cc660a43d6ee89a7ad4907111c073  | 0.307<br>8898<br>67 | k_Fungi;p_unidentified;c_unidentified;o_unidentified;f_unidentified;g_unidentified;s_unidentified                     |
| X64efc7cc8a98397ed156bb7deb9ea0d1  | 0.303<br>5622<br>3  | k_Fungi                                                                                                               |
| X022e203c0237562b1af030c2cda7cfd9  | 0.284<br>1714<br>27 | k_Fungi;p_unidentified;c_unidentified;o_unidentified;f_unidentified;g_unidentified;s_unidentified                     |
| cd27dfa017d816443e5e48c2d8993e06   | 0.259<br>3872       | k_Fungi;p_Ascomycota;c_Sordariomycetes;o_Microascales;f_Microascaceae;g_unidentified;s_unidentified                   |
| X9f07dabd22066fab4620a2ef42400d3   | 0.170<br>5613<br>71 | k_Fungi;p_Ascomycota;c_Dothideomycetes;o_Capnodiales                                                                  |
| X37f004671c936285c26471120596b2f5  | 0.166<br>0141<br>89 | k_Bacteria; p_Firmicutes; c_Clostridia; o_Clostridiales; f_Clostridiaceae; g_Sarcina; s_                              |
| X35cbb315e019e0a8768d4b73862df415  | 0.141<br>0575<br>52 | k_Bacteria; p_Actinobacteria; c_Coriobacteriia; o_Coriobacteriales; f_Coriobacteriaceae; g_Collinsella; s_aerofaciens |
| X3a0c5873e8683c4c3cec68faa75b3bb0  | 0.141<br>0575<br>52 | k_Bacteria; p_Proteobacteria; c_Gammaproteobacteria; o_Aeromonadales; f_Succinivibrionaceae; g_Ruminobacter; s_       |
| fcfe725f65877522a4a8db1e89380d7e   | 0.130<br>3614<br>94 | k_Bacteria                                                                                                            |
| X94a302cc7a648f23c27353f085b24e06  | 0.126<br>7662<br>03 | k_Bacteria; p_Firmicutes; c_Clostridia; o_Clostridiales; f_Veillonellaceae; g_Anaerovibrio; s_                        |
| b0b24b383b2d7d47b8858b31c76b40ee   | 0.119<br>5210<br>47 | k_Bacteria; p_Firmicutes; c_Clostridia; o_Clostridiales; f_Ruminococcaceae; g_; s_                                    |
| X6128c061f0201a07dcabe9199a0ba49e  | 0.119<br>5210<br>47 | k_Bacteria; p_Spirochaetes; c_Spirochaetes; o_Spirochaetales; f_Spirochaetaceae; g_Treponema; s_                      |
| c04c87ff72eb8ad4ec07894d5b0cf2a7   | 0.117<br>3535<br>46 | Unassigned                                                                                                            |
| aae4c4ed528ae16ec417df816699cfd9   | 0.117<br>3535<br>46 | k_Bacteria; p_Firmicutes; c_Clostridia; o_Clostridiales; f_Ruminococcaceae; g_; s_                                    |
| X4e2409473c1c1d45bc74650c14680360  | 0.105<br>6576<br>24 | k_Fungi;p_unidentified;c_unidentified;o_unidentified;f_unidentified;g_unidentified;s_unidentified                     |

|                                    |                     |                                                                                                                                        |
|------------------------------------|---------------------|----------------------------------------------------------------------------------------------------------------------------------------|
| X159f25ee8dfdd348c2ffee847ac7a30c  | 0.091<br>3846<br>42 | k_Bacteria; p_Planctomycetes; c_Planctomycetia; o_Pirellulales; f_Pirellulaceae; g_; s_                                                |
| a8b4b0d58275413b83f3fe9986834bb9   | 0.091<br>3846<br>42 | k_Bacteria; p_Firmicutes; c_Clostridia; o_Clostridiales; f_Ruminococcaceae; g_; s_                                                     |
| a63e647026935bffac1572dc6237a5d7   | 0.091<br>3846<br>42 | k_Bacteria; p_Firmicutes; c_Clostridia; o_Clostridiales; f_Ruminococcaceae; g_; s_                                                     |
| deb90060cd7e33d6b3e583a968e4a11e   | 0.091<br>3846<br>42 | k_Bacteria; p_Bacteroidetes; c_Bacteroidia; o_Bacteroidales; f_Prevotellaceae; g_Prevotella; s_copri                                   |
| X3114d42cc9f862a2a18d7e5efde7fa9b  | 0.091<br>3846<br>42 | k_Bacteria; p_Actinobacteria; c_Coriobacteriia; o_Coriobacteriales; f_Coriobacteriaceae; g_Slackia; s_                                 |
| c48070f3061b086b60ff32f77e0002fa   | 0.091<br>3846<br>42 | k_Bacteria; p_Firmicutes; c_Clostridia; o_Clostridiales; f_Ruminococcaceae; g_Faecalibacterium; s_prausnitzii                          |
| c6c3ab4e828fb40d6e05967b7aac9338   | 0.091<br>3846<br>42 | k_Bacteria; p_Firmicutes; c_Clostridia; o_Clostridiales; f_Lachnospiraceae; g_Blautia; s_                                              |
| X32fdd0ac9d955cf84083aeff0d0eead6  | 0.079<br>2819<br>86 | k_Fungi;p_unidentified;c_unidentified;o_unidentified;f_unidentified;g_unidentified;s_unidentified                                      |
| d008df29aded33e62b0a9f066ffba9a    | 0.078<br>9428<br>89 | k_Bacteria; p_Spirochaetes; c_Spirochaetes; o_Spirochaetales; f_Spirochaetaceae; g_Treponema; s_                                       |
| X67291fcee109ab8a23a8be4925084a4a  | 0.074<br>2340<br>68 | k_Bacteria                                                                                                                             |
| b4c0e06c3ac9a3a297c9c02a2a95ece1   | 0.074<br>2340<br>68 | k_Bacteria; p_Firmicutes; c_Clostridia; o_Clostridiales; f_Lachnospiraceae; g_Coproccoccus; s_                                         |
| e92159c91aeb204e77ba7a625416173e   | 0.074<br>2340<br>68 | k_Bacteria; p_Spirochaetes; c_Spirochaetes; o_Spirochaetales; f_Spirochaetaceae; g_Treponema; s_                                       |
| X673c876927c20776ed0bdc60805ab4c7  | 0.074<br>2340<br>68 | k_Bacteria; p_Bacteroidetes; c_Bacteroidia; o_Bacteroidales; f_S24-7; g_; s_                                                           |
| X66deff5f5235adaf a76ebd45e526df43 | 0.074<br>2340<br>68 | k_Bacteria; p_Firmicutes; c_Erysipelotrichi; o_Erysipelotrichales; f_Erysipelotrichaceae; g_Allobaculum; s_                            |
| a0d16414f352e45bb94592a4cfdd6c37   | 0.074<br>2340<br>68 | k_Bacteria; p_Cyanobacteria; c_4C0d-2; o_YS2; f_; g_; s_                                                                               |
| X0b85c3b6bae1477ecc014b93711dca4d  | 0.051<br>5274<br>85 | k_Fungi;p_Basidiomycota;c_Tremellomycetes;o_Trichosporonales;f_Trichosporonaceae;g_Cutaneotrichosporon;s_Cutaneotrichosporon_s_mithiae |
| X74a6b2d8faae4662532b0e4123964dac  | 0.048<br>9528<br>92 | k_Bacteria; p_Tenericutes; c_Mollicutes; o_RF39; f_; g_; s_                                                                            |
| cc1cf7a701a618852f5e2f3da57a6277   | 0.046<br>4931<br>42 | k_Bacteria; p_Firmicutes; c_Clostridia; o_Clostridiales; f_Ruminococcaceae; g_Ruminococcus; s_flavofaciens                             |
| X8adadd953ff6f3831d8492aaecdbe713  | 0.046<br>4931<br>42 | k_Bacteria; p_Proteobacteria; c_Gammaproteobacteria; o_Aeromonadales; f_Succinivibrionaceae; g_Succinivibrio; s_                       |

|                                   |                     |                                                                                                               |
|-----------------------------------|---------------------|---------------------------------------------------------------------------------------------------------------|
| X24284cec3ba6a25cbdeb7322cc8450f8 | 0.046<br>4931<br>42 | k_Bacteria; p_Verrucomicrobia; c_Verruco-5; o_WCHB1-41; f_RFP12; g_; s_                                       |
| X6a8452da8f7a21e41e8b7b1f96c18f41 | 0.046<br>4931<br>42 | k_Bacteria; p_Cyanobacteria; c_4C0d-2; o_YS2; f_; g_; s_                                                      |
| X528aa0da258f5c8f78efa1027e6acbe8 | 0.044<br>9080<br>58 | k_Bacteria; p_Firmicutes; c_Clostridia; o_Clostridiales; f_Lachnospiraceae                                    |
| X5e9a4e49c57a0f1457663cbec94ead42 | 0.044<br>9080<br>58 | k_Bacteria; p_Lentisphaerae; c_[Lentisphaeria]; o_Z20; f_R4-45B; g_; s_                                       |
| X880ff2cf5f6257cc1b867cd60fc8d0c6 | 0.044<br>9080<br>58 | k_Bacteria; p_Proteobacteria; c_Alphaproteobacteria; o_Rickettsiales; f_; g_; s_                              |
| X06ca1d8e7b0adc837e3a73dc4938a0b7 | 0.044<br>9080<br>58 | k_Bacteria; p_Firmicutes; c_Clostridia; o_Clostridiales; f_Ruminococcaceae; g_Ruminococcus; s_                |
| X9639a3291729a3758207b47715d9205f | 0.038<br>9768<br>52 | k_Bacteria; p_Firmicutes; c_Clostridia; o_Clostridiales; f_Ruminococcaceae; g_Gemmiger; s_formicilis          |
| X0a7fe3595e40caefecb26f55ecf526d  | 0.032<br>1388<br>21 | k_Fungi; p_Ascomycota; c_Dothideomycetes; o_Capnodiales; f_Cladosporiaceae; g_Cladosporium                    |
| f7e2b0a56c65be92cbe4e45ec5be863b  | 0.029<br>3213<br>68 | k_Bacteria; p_Firmicutes; c_Clostridia; o_Clostridiales; f_Christensenellaceae; g_; s_                        |
| X39993a34fd31592b41224d9e4f81ebb7 | 0.029<br>3213<br>68 | k_Bacteria; p_Verrucomicrobia; c_Verruco-5; o_WCHB1-41; f_RFP12; g_; s_                                       |
| b7bb03f41b2044386d4c609b1085f722  | 0.029<br>3213<br>68 | k_Bacteria; p_Verrucomicrobia; c_Verruco-5; o_WCHB1-41; f_RFP12; g_; s_                                       |
| X4109fbbe9cd1407916d6f86e0fc3038d | 0.029<br>3213<br>68 | k_Bacteria; p_Firmicutes; c_Clostridia; o_Clostridiales; f_; g_; s_                                           |
| ef302df176b1e1e14c64f4c3ccc6a54a  | 0.029<br>3213<br>68 | k_Bacteria; p_Verrucomicrobia; c_Verruco-5; o_WCHB1-41; f_RFP12; g_; s_                                       |
| X61535a40adb8221483821e3984d0b1ac | 0.029<br>3213<br>68 | k_Bacteria; p_Firmicutes; c_Clostridia; o_Clostridiales; f_Lachnospiraceae                                    |
| X3e77391a15f92a914190ae7e675bafd9 | 0.029<br>3213<br>68 | k_Bacteria; p_Firmicutes; c_Clostridia; o_Clostridiales; f_Lachnospiraceae; g_; s_                            |
| X86ff0efd7fd88b82809500c90c4a7832 | 0.029<br>3213<br>68 | k_Bacteria; p_Firmicutes; c_Clostridia; o_Clostridiales; f_Ruminococcaceae; g_Faecalibacterium; s_prausnitzii |
| X7857dc942cdb7fe42401378e8b21a98b | 0.028<br>1364<br>05 | k_Bacteria; p_Elusimicrobia; c_Elusimicrobia; o_Elusimicrobiales; f_Elusimicrobiaceae; g_; s_                 |
| X0dcf5023e96fb8175d7bf02d900c9dd1 | 0.027<br>7409<br>26 | k_Bacteria; p_Firmicutes; c_Clostridia; o_Clostridiales; f_Ruminococcaceae; g_; s_                            |
| X2543dd8ec108ba946069649982de4e33 | 0.026<br>9164<br>39 | k_Fungi; p_Ascomycota; c_Eurotiomycetes; o_Eurotiales; f_Aspergillaceae; g_Penicillium                        |

|                                           |                     |                                                                                                                         |
|-------------------------------------------|---------------------|-------------------------------------------------------------------------------------------------------------------------|
| cc7b0c4fe7613151<br>aee46e9be3ea14a9      | 0.023<br>7040<br>06 | k_Bacteria; p_Firmicutes; c_Clostridia; o_Clostridiales;<br>f_Ruminococcaceae; g_Oscillospira; s_                       |
| X56df15deaff21101<br>0e1470c27a31477f     | 0.023<br>7040<br>06 | k_Bacteria; p_Firmicutes; c_Clostridia; o_Clostridiales; f_; g_; s_                                                     |
| e865f29a716e8d51<br>f83931befa951240      | 0.023<br>7040<br>06 | k_Bacteria; p_Firmicutes; c_Erysipelotrichi; o_Erysipelotrichales;<br>f_Erysipelotrichaceae; g_; s_                     |
| ff1b8c1c7f48d303e<br>4bbc51cf5089e56      | 0.023<br>7040<br>06 | k_Bacteria; p_Firmicutes; c_Erysipelotrichi; o_Erysipelotrichales;<br>f_Erysipelotrichaceae; g_[Eubacterium]; s_biforme |
| a1c8a4289a5c93d4<br>8a8c7cc17815ba8a      | 0.023<br>7040<br>06 | k_Bacteria; p_Firmicutes; c_Erysipelotrichi; o_Erysipelotrichales;<br>f_Erysipelotrichaceae; g_Bulleidia; s_p-1630-c5   |
| f4f5f27b452dc435c<br>90e33bc62500294      | 0.023<br>7040<br>06 | k_Bacteria; p_Bacteroidetes; c_Bacteroidia; o_Bacteroidales; f_; g_;<br>s_                                              |
| X8f7e3b18e53065a<br>81eacdf0fb13c0b1      | 0.023<br>7040<br>06 | k_Bacteria; p_Bacteroidetes; c_Bacteroidia; o_Bacteroidales; f_; g_;<br>s_                                              |
| X54947f672cc0937<br>28ece078418837f8<br>2 | 0.023<br>7040<br>06 | k_Bacteria; p_Spirochaetes; c_Spirochaetes; o_Sphaerochaetales;<br>f_Sphaerochaetaceae; g_Sphaerochaeta; s_             |
| X6348584315770e<br>0d041c8543e1539<br>4f1 | 0.018<br>5236<br>84 | k_Bacteria; p_Firmicutes; c_Clostridia; o_Clostridiales;<br>f_Ruminococcaceae                                           |
| X8ebc5c1f92c8c0fd<br>263bafc9882304a2     | 0.018<br>5236<br>84 | k_Bacteria; p_Bacteroidetes; c_Bacteroidia; o_Bacteroidales; f_; g_;<br>s_                                              |
| X17b93228ec8a29<br>b236559a1b56a71c<br>26 | 0.015<br>5866<br>9  | k_Bacteria; p_Bacteroidetes; c_Bacteroidia; o_Bacteroidales; f_; g_;<br>s_                                              |
| X4f73103c89da880<br>0036a75ac5df9fb7<br>4 | 0.015<br>5866<br>9  | k_Bacteria; p_Firmicutes; c_Clostridia; o_Clostridiales;<br>f_Lachnospiraceae; g_; s_                                   |
| X65990c74559e4a<br>dfaa672a884ad7d4<br>64 | 0.015<br>5866<br>9  | k_Bacteria; p_Firmicutes; c_Clostridia; o_Clostridiales;<br>f_Lachnospiraceae; g_Coproccoccus; s_catus                  |
| b726627e18f29e0d<br>a5289f81ca294f92      | 0.015<br>5866<br>9  | k_Bacteria; p_Firmicutes; c_Clostridia; o_Clostridiales;<br>f_Ruminococcaceae                                           |
| X3219af75ee8056e<br>d06ba81e873b0d0c<br>b | 0.015<br>5866<br>9  | k_Bacteria; p_Firmicutes; c_Clostridia; o_Clostridiales;<br>f_Ruminococcaceae; g_Oscillospira; s_                       |
| X3d6e1834125d9a<br>b26f23a1bf8db219<br>5f | 0.015<br>5866<br>9  | k_Bacteria; p_Proteobacteria; c_Deltaproteobacteria; o_GMD14H09;<br>f_; g_; s_                                          |
| X274d44a1056845<br>12d6df0a983a5b66<br>63 | 0.012<br>5924<br>79 | k_Bacteria; p_Firmicutes; c_Clostridia; o_Clostridiales;<br>f_Clostridiaceae; g_02d06; s_                               |
| X935a26480fd0df6<br>74c49c7a7f219c78<br>6 | 0.011<br>2808<br>9  | k_Fungi; p_Ascomycota; c_Sordariomycetes; o_Sordariales; f_Sordaria<br>ceae; g_Sordaria; s_Sordaria_fimicola            |
| X09887403d0ff191<br>779ed7573826291<br>7c | 0.010<br>2285<br>55 | k_Bacteria; p_Spirochaetes; c_Spirochaetes; o_Spirochaetales;<br>f_Spirochaetaceae; g_Treponema; s_                     |

|                                   |                     |                                                                                                                          |
|-----------------------------------|---------------------|--------------------------------------------------------------------------------------------------------------------------|
| e68c1bb6fac22947077f421d9a5b031   | 0.009<br>5391<br>07 | k_Fungi;p_unidentified;c_unidentified;o_unidentified;f_unidentified<br>;g_unidentified;s_unidentified                    |
| a9e2afd4297fd011649a216315249232  | 0.009<br>1477<br>84 | k_Bacteria; p_Bacteroidetes; c_Bacteroidia; o_Bacteroidales;<br>f_Prevotellaceae; g_; s_                                 |
| X40a99f13336f2908c2101fada03e8925 | 0.008<br>2760<br>56 | k_Bacteria; p_Firmicutes; c_Clostridia; o_Clostridiales;<br>f_Lachnospiraceae; g_Coproccoccus; s_                        |
| b33432097ae173340229ec6cf0cb249c  | 0.007<br>0429<br>5  | k_Fungi                                                                                                                  |
| X9f5863a1c1d6034cff75066ead33e04e | 0.006<br>2709<br>76 | k_Fungi;p_unidentified;c_unidentified;o_unidentified;f_unidentified<br>;g_unidentified;s_unidentified                    |
| f5f5e0da89730462abaf6301a9557193  | 0.005<br>3524<br>38 | k_Bacteria; p_Firmicutes; c_Clostridia; o_Clostridiales;<br>f_Ruminococcaceae; g_Faecalibacterium; s_prausnitzii         |
| X45158693222383612f0b6b469c0be1fe | 0.004<br>7088<br>21 | k_Bacteria; p_Bacteroidetes; c_Bacteroidia; o_Bacteroidales;<br>f_[Paraprevotellaceae]; g_[Prevotella]; s_               |
| X3e24620a7af3193ab178578867926be2 | 0.004<br>7088<br>21 | k_Bacteria; p_Firmicutes; c_Clostridia; o_Clostridiales;<br>f_Peptostreptococcaceae                                      |
| X54239c6454a6a3d3a48e90a79744afb7 | 0.002<br>9369<br>95 | k_Bacteria; p_Firmicutes; c_Clostridia; o_Clostridiales;<br>f_Ruminococcaceae                                            |
| cb908ae7d11351c78c0e4ce0d849c744  | 0.002<br>9369<br>95 | k_Bacteria; p_Firmicutes; c_Clostridia; o_Clostridiales;<br>f_Ruminococcaceae; g_; s_                                    |
| a2d300d1e9c621dbc5239cc092d433c3  | 0.002<br>9369<br>95 | k_Bacteria; p_Firmicutes; c_Clostridia; o_Clostridiales; f_; g_; s_                                                      |
| ed6b49ec452f003a91e2b30eb15cdf6c  | 0.001<br>8387<br>12 | k_Fungi;p_Ascomycota;c_Eurotiomycetes;o_Eurotiales;f_Aspergilla<br>ceae;g_Penicillium;s_unidentified                     |
| d76d59ec71de0e3b22da0c9cd564d41a  | 0.001<br>5153<br>45 | k_Bacteria; p_Firmicutes; c_Clostridia; o_Clostridiales;<br>f_Lachnospiraceae                                            |
| X96cf4779be686036f92ee15e58b72d52 | 0.001<br>5153<br>45 | k_Bacteria; p_Firmicutes; c_Clostridia; o_Clostridiales;<br>f_Veillonellaceae; g_Phascolarctobacterium; s_               |
| X89ddf52e50218f8dff5d6e93e6e65f0a | 0.001<br>5153<br>45 | k_Bacteria; p_Firmicutes; c_Clostridia; o_Clostridiales;<br>f_Ruminococcaceae; g_; s_                                    |
| X4102c0c9284b080a36ae312a7b497915 | 0.001<br>0397<br>58 | k_Bacteria; p_Proteobacteria; c_Deltaproteobacteria;<br>o_Desulfovibrionales; f_Desulfovibrionaceae; g_Desulfovibrio; s_ |
| ff6fd693d1740f436ec1317219115750  | 0.001<br>0309       | k_Bacteria; p_Bacteroidetes; c_Bacteroidia; o_Bacteroidales;<br>f_Porphyrimonadaceae; g_Parabacteroides; s_              |
| X59777186ad2e0947e97615b5d6225136 | 0.001<br>0309       | k_Bacteria; p_Firmicutes; c_Clostridia; o_Clostridiales;<br>f_Ruminococcaceae; g_Faecalibacterium; s_prausnitzii         |
| X01e2df15a7c13fe503196a9b9ebff980 | 0.001<br>0309       | k_Bacteria; p_Tenericutes; c_Mollicutes; o_Anaeroplasmatales;<br>f_Anaeroplasmataceae; g_Anaeroplasma; s_                |

|                                   |             |                                                                                                          |
|-----------------------------------|-------------|----------------------------------------------------------------------------------------------------------|
| X6077859e3a7ca4807e8d3b9ec2dfe082 | 0.000871728 | k_Bacteria; p_Firmicutes; c_Clostridia; o_Clostridiales; f_; g_; s_                                      |
| X2c56af9b2c17b64fd4c7a2fa95fcf197 | 0.000871728 | k_Bacteria; p_Spirochaetes; c_Spirochaetes; o_Sphaerochaetales; f_Sphaerochaetaceae; g_Sphaerochaeta; s_ |
| f499d206798403d58d114c5d0ed6c832  | 0.000871728 | k_Bacteria; p_Cyanobacteria; c_4C0d-2; o_YS2; f_; g_; s_                                                 |
| X11e80f6b0f99ffd9c86001e7dcc2472f | 0.000811648 | k_Bacteria; p_Firmicutes; c_Erysipelotrichi; o_Erysipelotrichales; f_Erysipelotrichaceae; g_RFN20; s_    |
| dfe6c643b7485f470e3cc6d40221a8df  | 0.000811648 | k_Bacteria; p_Firmicutes; c_Clostridia; o_Clostridiales; f_Lachnospiraceae                               |
| X20a68b281025ba8f8addffca22b306a  | 0.000643618 | k_Bacteria; p_Bacteroidetes; c_Bacteroidia; o_Bacteroidales; f_Prevotellaceae; g_Prevotella; s_          |
| fe6fc175855fb067abd854c21279b845  | 0.000643618 | k_Bacteria; p_Firmicutes; c_Clostridia; o_Clostridiales; f_Ruminococcaceae                               |
| X3b3f9c7bb2ca421e0c31645737223b39 | 0.00060339  | k_Bacteria; p_Verrucomicrobia; c_Verruco-5; o_WCHB1-41; f_RFP12; g_; s_                                  |
| c95b6b8f54f860200da7644517333239  | 0.000573071 | k_Bacteria; p_Bacteroidetes; c_Bacteroidia; o_Bacteroidales; f_[Paraprevotellaceae]; g_CF231; s_         |
| X1a8ad95a0274f9686ca16a69ab153918 | 0.00033177  | k_Fungi;p_unidentified;c_unidentified;o_unidentified;f_unidentified;g_unidentified;s_unidentified        |
| X54a2bfb0a96adc52c4ccca239ad01466 | 0.00017692  | k_Bacteria; p_Firmicutes; c_Clostridia; o_Clostridiales; f_Ruminococcaceae; g_Ruminococcus; s_           |
| X9acb555d3c5dd77e9035a661e7ad1bb6 | 0.00016803  | k_Bacteria; p_Firmicutes; c_Clostridia; o_Clostridiales; f_Clostridiaceae; g_Clostridium; s_celatum      |
| X3afd2ff14c94969b67b49b45adafb760 | 0.00016803  | k_Bacteria; p_Spirochaetes; c_Spirochaetes; o_Spirochaetales; f_Spirochaetaceae; g_Treponema; s_         |
| e432a172c15b9c449cea7ac7828eba95  | 0.00016803  | k_Bacteria; p_Firmicutes; c_Bacilli; o_Lactobacillales; f_Lactobacillaceae; g_Lactobacillus; s_          |
| X2ec8a70980fe98f5039f02c624042c91 | 9.73E-05    | k_Fungi;p_unidentified;c_unidentified;o_unidentified;f_unidentified;g_unidentified;s_unidentified        |

Supplementary Table2. Sheet4. Key taxa in Captive Western Lowland Gorilla identified based on the network hub score.

| ASV                               | HubS core          | Taxa                                                                                                        |
|-----------------------------------|--------------------|-------------------------------------------------------------------------------------------------------------|
| cccb119ab38bd8544732a0d525c9125d  | 1                  | k_Fungi                                                                                                     |
| X9aeaf3016bff201f723b2c61aed4d73a | 0.833<br>9941<br>8 | k_Fungi                                                                                                     |
| X2fddd02a57f8ceb4c8ae4f7e6ee0040d | 0.699<br>0463<br>4 | k_Fungi;p_unidentified;c_unidentified;o_unidentified;f_unidentified;g_unidentified;s_unidentified           |
| ef974ef33a37e04588c24fb83f533d4e  | 0.572<br>0550<br>7 | k_Fungi;p_unidentified;c_unidentified;o_unidentified;f_unidentified;g_unidentified;s_unidentified           |
| eae7022c2729b4b1ea7a62abe468e799  | 0.559<br>4086<br>8 | k_Fungi                                                                                                     |
| X4508f7952b28669ca020b60e95bec469 | 0.399<br>4286<br>9 | k_Fungi;p_Ascomycota;c_Sordariomycetes;o_Sordariales;f_Lasiophaeriaceae;g_Podospora;s_Podospora_longicollis |
| X170b12863014c91d2a9b791d6540ef77 | 0.316<br>2999<br>5 | k_Fungi                                                                                                     |
| X96e7e25cdc80521a63c692e16f047093 | 0.289<br>8528      | k_Fungi;p_unidentified;c_unidentified;o_unidentified;f_unidentified;g_unidentified;s_unidentified           |
| X31e61e702cd999e03597ff23fcb3aa64 | 0.275<br>0148<br>7 | k_Bacteria; p_Lentisphaerae; c_[Lentisphaeria]; o_Z20; f_R4-45B; g_; s_                                     |
| ac7fe0192cd9a64714d246e95fe0bb87  | 0.271<br>2932<br>2 | k_Fungi                                                                                                     |
| a00b80d9e17196f223b318053de2fc63  | 0.205<br>1190<br>8 | k_Fungi;p_unidentified;c_unidentified;o_unidentified;f_unidentified;g_unidentified;s_unidentified           |
| X536e8f9e5358ea477cfa84657d69043a | 0.166<br>9647<br>1 | k_Bacteria; p_Bacteroidetes; c_Bacteroidia; o_Bacteroidales; f_RF16; g_; s_                                 |
| a7571cd4237c0aba55f06d43296a3eb5  | 0.144<br>2226<br>2 | k_Bacteria; p_Firmicutes; c_Clostridia; o_Clostridiales; f_Clostridiaceae; g_Clostridium; s_                |
| X9272b77aef548a2efc2b1917e111018  | 0.144<br>2226<br>2 | k_Bacteria; p_Firmicutes; c_Clostridia; o_Clostridiales; f_Ruminococcaceae; g_; s_                          |
| X2e7dd2d044c222cf34a93c75ce67eaaa | 0.144<br>2226<br>2 | k_Bacteria; p_Spirochaetes; c_Spirochaetes; o_Spirochaetales; f_Spirochaetaceae; g_Treponema; s_            |
| d68bf654aa3d8a13b2ed6ce7ff9e7826  | 0.144<br>2226<br>2 | k_Bacteria; p_Spirochaetes; c_Spirochaetes; o_Spirochaetales; f_Spirochaetaceae; g_Treponema; s_            |
| cf5031364fd6f4fdbfcfb2fd88bd4f8   | 0.144<br>2226<br>2 | k_Bacteria; p_Firmicutes; c_Clostridia; o_Clostridiales; f_Ruminococcaceae; g_Oscillospira; s_              |
| X72fda00662eaa167bd1c082d0302f709 | 0.144<br>2226<br>2 | k_Bacteria; p_Firmicutes; c_Clostridia; o_Clostridiales; f_; g_; s_                                         |

|                                   |                    |                                                                                                            |
|-----------------------------------|--------------------|------------------------------------------------------------------------------------------------------------|
| X3127bd317be815d64dff5a7895408312 | 0.144<br>2226<br>2 | k_Bacteria; p_Firmicutes; c_Clostridia; o_Clostridiales; f_Ruminococcaceae; g_; s_                         |
| e2f5328726e4b0bb7e365a0c1d9e85b7  | 0.144<br>2226<br>2 | k_Bacteria; p_Firmicutes; c_Clostridia; o_Clostridiales; f_Ruminococcaceae; g_; s_                         |
| X7d6b17e49613cdad1210312654549570 | 0.121<br>3582<br>2 | k_Bacteria; p_Spirochaetes; c_Spirochaetes; o_Sphaerochaetales; f_Sphaerochaetaceae; g_Sphaerochaeta; s_   |
| X612c1a863fb0f34f5edbccffa3a9c73a | 0.120<br>6192<br>9 | k_Archaea; p_Euryarchaeota; c_Thermoplasmata; o_E2; f_[Methanomassiliococcaceae]; g_vadinCA11; s_          |
| ffe811c34c6c002613241c56ed0322a0  | 0.119<br>4799<br>5 | k_Bacteria; p_Firmicutes; c_Clostridia; o_Clostridiales; f_Lachnospiraceae                                 |
| X5e6805e860c751a55bd7ce70ca4b7534 | 0.119<br>4799<br>5 | k_Bacteria; p_Firmicutes; c_Clostridia; o_Clostridiales; f_Ruminococcaceae; g_; s_                         |
| X0c8c796cb9568bb42a42b207bc78a7e8 | 0.117<br>6270<br>5 | k_Fungi                                                                                                    |
| X524145c68413c96798867bbdb482bea8 | 0.104<br>4213<br>2 | k_Bacteria; p_Bacteroidetes; c_Bacteroidia; o_Bacteroidales; f_; g_; s_                                    |
| X794cc1c6386320420a2c2ea76eedaaf8 | 0.104<br>4213<br>2 | k_Bacteria; p_Firmicutes; c_Clostridia; o_Clostridiales; f_Ruminococcaceae; g_; s_                         |
| d6431d139bc9a31edd4c56368217b4d   | 0.090<br>3921      | k_Bacteria; p_Firmicutes; c_Clostridia; o_Clostridiales; f_Christensenellaceae; g_; s_                     |
| d7907139a74128fa9785178a7a3e4421  | 0.089<br>5074<br>1 | k_Bacteria; p_Verrucomicrobia; c_Verruco-5; o_WCHB1-41; f_RFP12; g_; s_                                    |
| cc1cf7a701a618852f5e2f3da57a6277  | 0.087<br>2860<br>6 | k_Bacteria; p_Firmicutes; c_Clostridia; o_Clostridiales; f_Ruminococcaceae; g_Ruminococcus; s_flavefaciens |
| X0088fdc9bf1dfa441e53e964ad7591a5 | 0.085<br>6733<br>6 | k_Bacteria; p_Firmicutes; c_Clostridia; o_Clostridiales; f_Ruminococcaceae; g_; s_                         |
| f6be8fd3434273e20c0b5a1461ee3c85  | 0.083<br>9476<br>8 | k_Bacteria; p_Firmicutes; c_Clostridia; o_Clostridiales; f_; g_; s_                                        |
| X59b961d6271b069ab40420ecdbe35e0c | 0.080<br>9248<br>8 | k_Bacteria; p_Firmicutes; c_Clostridia; o_Clostridiales; f_Ruminococcaceae; g_; s_                         |
| bd85ca4d76167e7ecf3ec65f8701e35c  | 0.080<br>9248<br>8 | k_Bacteria; p_Firmicutes; c_Erysipelotrichi; o_Erysipelotrichales; f_Erysipelotrichaceae; g_RFN20; s_      |
| X2c56af9b2c17b64fd4c7a2fa95fcf197 | 0.080<br>0556<br>1 | k_Bacteria; p_Spirochaetes; c_Spirochaetes; o_Sphaerochaetales; f_Sphaerochaetaceae; g_Sphaerochaeta; s_   |
| X3cdea77d0433c3e929515bd898a9724a | 0.074<br>9455<br>9 | k_Bacteria; p_Bacteroidetes; c_Bacteroidia; o_Bacteroidales; f_; g_; s_                                    |
| c0241dff3c50c2bd8484d30accbbea2a  | 0.074<br>9455<br>9 | k_Bacteria; p_Cyanobacteria; c_4C0d-2; o_YS2; f_; g_; s_                                                   |



|                                    |                    |                                                                                                               |
|------------------------------------|--------------------|---------------------------------------------------------------------------------------------------------------|
| X32fdd0ac9d955cf84083aef0d0eead6   | 0.074<br>3468<br>5 | k_Fungi;p_unidentified;c_unidentified;o_unidentified;f_unidentified;g_unidentified;s_unidentified             |
| X1e6f14b638e1593de746394f96eed0df  | 0.072<br>0036<br>2 | k_Bacteria; p_Firmicutes; c_Clostridia; o_Clostridiales; f_Ruminococcaceae; g_; s_                            |
| X8ec7ad4ccb595f7af04d4cf4394e14d   | 0.070<br>5538<br>9 | k_Fungi;p_unidentified;c_unidentified;o_unidentified;f_unidentified;g_unidentified;s_unidentified             |
| b73dfbea02dfca1e4ab401e53fc31ab5   | 0.070<br>2268<br>6 | k_Bacteria; p_Firmicutes; c_Clostridia; o_Clostridiales; f_Ruminococcaceae; g_; s_                            |
| b852420578e04f24dfef8591f9322eeb   | 0.070<br>2268<br>6 | k_Bacteria; p_Firmicutes; c_Clostridia; o_Clostridiales; f_Ruminococcaceae                                    |
| a217b6092dfe383f3663e46a925ef893   | 0.068<br>4387<br>5 | k_Bacteria; p_Firmicutes; c_Clostridia; o_Clostridiales; f_; g_; s_                                           |
| aa77ead1195463b9ccc93ecaa33bf6f4   | 0.067<br>0831      | k_Bacteria; p_Firmicutes; c_Clostridia; o_Clostridiales; f_Veillonellaceae; g_Schwartzia; s_                  |
| X847dd19dd00c43810f3051cf594a1a77  | 0.064<br>4216<br>6 | k_Bacteria                                                                                                    |
| X66bf0cd4dc666eb2858567908e536a3e  | 0.064<br>4216<br>6 | k_Bacteria; p_Proteobacteria; c_Alphaproteobacteria; o_RF32; f_; g_; s_                                       |
| bfd71e3ae2d65c810f5a8b922073d55a   | 0.064<br>4216<br>6 | k_Bacteria; p_Proteobacteria; c_Gammaproteobacteria; o_Aeromonadales; f_Succinivibrionaceae; g_; s_           |
| bbf05181187cd72dd323041c57ba73f9   | 0.064<br>4216<br>6 | k_Bacteria; p_Tenericutes; c_RF3; o_ML615J-28; f_; g_; s_                                                     |
| X961207bc9171c53851bf1ae389fdbcb8f | 0.064<br>4216<br>6 | k_Bacteria; p_Cyanobacteria; c_4C0d-2; o_YS2; f_; g_; s_                                                      |
| de538b4503aa6cb78336f2067daaed3c   | 0.057<br>2771<br>6 | k_Bacteria; p_Planctomycetes; c_Planctomycetia; o_Pirellulales; f_Pirellulaceae; g_; s_                       |
| X291e288a11df43742c359d0276e911c1  | 0.056<br>9365<br>6 | k_Bacteria; p_Firmicutes; c_Clostridia; o_Clostridiales; f_; g_; s_                                           |
| X2986bbe7d293a27dd6204cde2ab28477  | 0.056<br>9365<br>6 | k_Bacteria; p_Firmicutes; c_Clostridia; o_Clostridiales; f_Lachnospiraceae; g_; s_                            |
| bb47077706877cba0ec7ac2f57d4dc87   | 0.056<br>9365<br>6 | k_Bacteria; p_Tenericutes; c_Mollicutes; o_RF39; f_; g_; s_                                                   |
| c48070f3061b086b60ff32f77e0002fa   | 0.056<br>9365<br>6 | k_Bacteria; p_Firmicutes; c_Clostridia; o_Clostridiales; f_Ruminococcaceae; g_Faecalibacterium; s_prausnitzii |
| X41a682ff5b44533c0912c7cd987419ff  | 0.054<br>1918<br>1 | k_Bacteria; p_Verrucomicrobia; c_Verruco-5; o_WCHB1-41; f_RFP12; g_; s_                                       |
| d1720fa992a428f1a4a9fb8e436b7866   | 0.053<br>0911<br>7 | k_Bacteria; p_Proteobacteria; c_Betaproteobacteria; o_Burkholderiales; f_Alcaligenaceae; g_Sutterella; s_     |

|                                        |                    |                                                                                                                       |
|----------------------------------------|--------------------|-----------------------------------------------------------------------------------------------------------------------|
| X74b205364779788<br>584cf822deb1615be  | 0.052<br>9063<br>4 | k_Archaea; p_Euryarchaeota; c_Thermoplasmata; o_E2;<br>f_[Methanomassiliococcaceae]; g_vadinCA11; s__                 |
| e6c95d620576f6503<br>d607275d777bef1   | 0.052<br>5870<br>8 | k_Archaea; p_Euryarchaeota; c_Thermoplasmata; o_E2;<br>f_[Methanomassiliococcaceae]; g__; s__                         |
| ec3c4e6dd84442b57<br>89313cc9d9e5cfb   | 0.049<br>8598<br>4 | k_Bacteria; p_Spirochaetes; c_Spirochaetes; o_Spirochaetales;<br>f_Spirochaetaceae; g_Treponema; s__                  |
| a9e2afd4297fd0116<br>49a216315249232   | 0.048<br>0173<br>5 | k_Bacteria; p_Bacteroidetes; c_Bacteroidia; o_Bacteroidales;<br>f_Prevotellaceae; g__; s__                            |
| X902dc2afbcca15736<br>090e3fe703673268 | 0.047<br>4847<br>6 | k_Bacteria; p_Proteobacteria; c_Deltaproteobacteria;<br>o_Desulfovibrionales; f_Desulfovibrionaceae; g_Bilophila; s__ |
| X39d811658a63215<br>ad320d73c5f0c0d16  | 0.047<br>4847<br>6 | k_Bacteria; p_Cyanobacteria; c_4C0d-2; o_YS2; f__; g__; s__                                                           |
| bd02f5c417cc8b1d7<br>4c3c5bdd030547f   | 0.047<br>4847<br>6 | k_Bacteria; p_Bacteroidetes; c_Bacteroidia; o_Bacteroidales; f_S24-<br>7; g__; s__                                    |
| X935a26480fd0df67<br>4c49c7a7f219c786  | 0.047<br>0606<br>8 | k_Fungi; p_Ascomycota; c_Sordariomycetes; o_Sordariales; f_Sordari<br>aceae; g_Sordaria; s_Sordaria_fimicola          |
| X76b256496b7923e<br>3fe43c1e12fd04bea  | 0.046<br>2090<br>6 | k_Bacteria; p_Bacteroidetes; c_Bacteroidia; o_Bacteroidales; f__; g__;<br>s__                                         |
| X3ee0ff836431c7ba5<br>a4b0106b4dd047f  | 0.040<br>4803<br>2 | k_Fungi                                                                                                               |
| X207ae2c759c09be9<br>76bbb456d7d7eca6  | 0.039<br>8013      | k_Bacteria; p_Firmicutes; c_Clostridia; o_Clostridiales;<br>f_[Mogibacteriaceae]; g__; s__                            |
| X10b0ccda77f21a69<br>527f7596b15c1c23  | 0.039<br>2681<br>3 | k_Bacteria; p_Actinobacteria; c_Coriobacteriia; o_Coriobacteriales;<br>f_Coriobacteriaceae; g__; s__                  |
| X37f004671c936285<br>c26471120596b2f5  | 0.038<br>7453<br>1 | k_Bacteria; p_Firmicutes; c_Clostridia; o_Clostridiales;<br>f_Clostridiaceae; g_Sarcina; s__                          |
| f90db7a7347641bf0<br>95b13079a732743   | 0.036<br>5879<br>5 | k_Bacteria; p_Cyanobacteria; c_4C0d-2; o_YS2; f__; g__; s__                                                           |
| X6cec9979c3e76d43<br>16a289bf1792356f  | 0.035<br>8679      | k_Bacteria; p_Proteobacteria; c_Betaproteobacteria;<br>o_Burkholderiales; f_Alcaligenaceae; g_Sutterella; s__         |
| X7717c9811843976<br>2317647199c6005f7  | 0.032<br>5708<br>5 | k_Bacteria; p_Firmicutes; c_Clostridia; o_Clostridiales;<br>f_Ruminococcaceae; g__; s__                               |
| X7a313870bb97fff94<br>3b4b91400a6b835  | 0.032<br>5708<br>5 | k_Bacteria; p_Firmicutes; c_Erysipelotrichi; o_Erysipelotrichales;<br>f_Erysipelotrichaceae; g_p-75-a5; s__           |
| X1674e324c2a5468e<br>18c7dcbaf186fbc   | 0.031<br>8508<br>1 | k_Bacteria; p_Proteobacteria; c_Betaproteobacteria;<br>o_Burkholderiales; f_Alcaligenaceae; g_Sutterella; s__         |
| X39993a34fd31592b<br>41224d9e4f81ebb7  | 0.031<br>8508<br>1 | k_Bacteria; p_Verrucomicrobia; c_Verruco-5; o_WCHB1-41;<br>f_RFP12; g__; s__                                          |
| c5f3a4a8747b9b59b<br>103e9483331a9e8   | 0.031<br>8508<br>1 | k_Bacteria; p_Firmicutes; c_Erysipelotrichi; o_Erysipelotrichales;<br>f_Erysipelotrichaceae; g_RFN20; s__             |

|                                   |                    |                                                                                                                           |
|-----------------------------------|--------------------|---------------------------------------------------------------------------------------------------------------------------|
| X7100dfa468d3c9b5bd2fcf5ed08fa08  | 0.031<br>8508<br>1 | k_Bacteria; p_Bacteroidetes; c_Bacteroidia; o_Bacteroidales; f_[Paraprevotellaceae]; g_[Prevotella]; s__                  |
| X19b64c1194c673268602e8d04c38bb36 | 0.031<br>8508<br>1 | k_Bacteria; p_Bacteroidetes; c_Bacteroidia; o_Bacteroidales; f_[Paraprevotellaceae]; g_YRC22; s__                         |
| X64c48d34bfc2889dfe1788d653ecda6d | 0.031<br>8508<br>1 | k_Bacteria; p_Bacteroidetes; c_Bacteroidia; o_Bacteroidales; f_[Paraprevotellaceae]; g_YRC22; s__                         |
| ed66913c64e880ea0b4cf78c59280664  | 0.028<br>9567<br>9 | k_Bacteria; p_Proteobacteria; c_Deltaproteobacteria; o_Desulfovibrionales; f_Desulfovibrionaceae; g_Desulfovibrio; s_D168 |
| X26736c7ee02864e6bbab37424d69a4ed | 0.028<br>182       | k_Bacteria; p_Firmicutes; c_Clostridia; o_Clostridiales; f_Christensenellaceae; g__; s__                                  |
| X7c104699e795bbf45f90fceac906e6b4 | 0.025<br>0469<br>1 | k_Bacteria; p_Firmicutes; c_Clostridia; o_Clostridiales; f__; g__; s__                                                    |
| X852ea7a368aaeed1771f6015db845c99 | 0.024<br>7063<br>1 | k_Bacteria; p_Firmicutes; c_Clostridia; o_Clostridiales; f_Ruminococcaceae; g__; s__                                      |
| fe813a83837c80d34b56a8f8469d078f  | 0.022<br>7421      | k_Bacteria; p_Firmicutes; c_Clostridia; o_Clostridiales; f__; g__; s__                                                    |
| X5d08d1eb4b8a0672652dd0fc0af2dcf0 | 0.022<br>7421      | k_Bacteria; p_Firmicutes; c_Clostridia; o_Clostridiales; f_Ruminococcaceae; g_Oscillospira; s__                           |
| aca1c3a17e598f4af26d49efed7f1ccd  | 0.022<br>7421      | k_Bacteria; p_Firmicutes; c_Clostridia; o_Clostridiales; f_Veillonellaceae; g_Phascalactobacterium; s__                   |
| X9af26e3d0d56c56bd4723ff57308c816 | 0.022<br>2420<br>9 | k_Bacteria; p_Elusimicrobia; c_Elusimicrobia; o_Elusimicrobiales; f_Elusimicrobiaceae; g__; s__                           |
| X13b0362e9465a50a41c280177cb9cb7f | 0.020<br>7362<br>8 | k_Bacteria; p_Firmicutes; c_Clostridia; o_Clostridiales; f_Ruminococcaceae; g__; s__                                      |
| a6b8973aee14771b1609fc644ddc87dc  | 0.020<br>6885<br>1 | k_Bacteria; p_Firmicutes; c_Clostridia; o_Clostridiales; f_Ruminococcaceae; g__; s__                                      |
| c018ebf77815e2abed59f10638aa7bc5  | 0.018<br>0090<br>3 | k_Bacteria; p_Firmicutes; c_Clostridia; o_Clostridiales; f_Lachnospiraceae; g__; s__                                      |
| a1d0f08cfb19d7aaed2955688f06c25a  | 0.018<br>0090<br>3 | k_Bacteria; p_Bacteroidetes; c_Bacteroidia; o_Bacteroidales; f_Prevotellaceae; g_Prevotella; s__                          |
| cb908ae7d11351c78c0e4ce0d849c744  | 0.016<br>5032<br>2 | k_Bacteria; p_Firmicutes; c_Clostridia; o_Clostridiales; f_Ruminococcaceae; g__; s__                                      |
| X86ea0860dfe67c2d8eaa4b80741fae86 | 0.016<br>5032<br>2 | k_Bacteria; p_Verrucomicrobia; c_Verruco-5; o_WCHB1-41; f_RFP12; g__; s__                                                 |
| X4a566e4b581d463e92973dd4d23cd9d3 | 0.015<br>9118<br>3 | k_Bacteria; p_Bacteroidetes; c_Bacteroidia; o_Bacteroidales; f_Bacteroidaceae; g_Bacteroides                              |
| X13e5e67a2599db5c3cdfa82c4c9ea6fd | 0.015<br>4465      | k_Bacteria; p_Firmicutes; c_Clostridia; o_Clostridiales; f_Ruminococcaceae; g__; s__                                      |
| X5bcbc3e28007b9a9d208d6668049410e | 0.013<br>6080<br>5 | k_Fungi; p_unidentified; c_unidentified; o_unidentified; f_unidentified; g_unidentified; s_unidentified                   |
| X0d8f66a81ffc5aa4408a33c6f4bdc68  | 0.011<br>6787<br>8 | k_Bacteria; p_Firmicutes; c_Clostridia; o_Clostridiales; f__; g__; s__                                                    |

|                                       |                    |                                                                                                                            |
|---------------------------------------|--------------------|----------------------------------------------------------------------------------------------------------------------------|
| X3d6e1834125d9ab<br>26f23a1bf8db2195f | 0.011<br>6787<br>8 | k_Bacteria; p_Proteobacteria; c_Deltaproteobacteria; o_GMD14H09;<br>f_; g_; s_                                             |
| X0b4aeb45916a24fd<br>10e3655fe6481966 | 0.011<br>6787<br>8 | k_Bacteria; p_Firmicutes; c_Clostridia; o_Clostridiales;<br>f_Christensenellaceae; g_; s_                                  |
| X4c974b834afe158c<br>4265402ee0bfcbad | 0.011<br>6787<br>8 | k_Bacteria; p_Bacteroidetes; c_Bacteroidia; o_Bacteroidales; f_S24-<br>7; g_; s_                                           |
| X44396f15b10f6577<br>d61a11c6047c939f | 0.011<br>6787<br>8 | k_Archaea; p_Euryarchaeota; c_Methanobacteria;<br>o_Methanobacteriales; f_Methanobacteriaceae;<br>g_Methanobrevibacter; s_ |
| acaf226f9fae14dc71<br>a81968d9c33f93  | 0.011<br>6787<br>8 | k_Bacteria; p_Firmicutes; c_Clostridia; o_Clostridiales;<br>f_Veillonellaceae; g_; s_                                      |
| f5bfbf665081e0133b<br>dcba9fcfc6023d  | 0.011<br>6787<br>8 | k_Bacteria; p_Bacteroidetes; c_Bacteroidia; o_Bacteroidales;<br>f_[Paraprevotellaceae]; g_CF231; s_                        |
| X16530e5b50b7800<br>18210dac05a471715 | 0.011<br>6787<br>8 | k_Bacteria; p_Firmicutes; c_Clostridia; o_Clostridiales;<br>f_Ruminococcaceae; g_Oscillospira; s_                          |
| c66ec67719e54d2cb<br>0afc3154b3c23af  | 0.011<br>6787<br>8 | k_Bacteria; p_Firmicutes; c_Clostridia; o_Clostridiales; f_; g_; s_                                                        |
| b7d0596261d747c1<br>ac8e1c8b3dca415c  | 0.011<br>6787<br>8 | k_Bacteria; p_Firmicutes; c_Clostridia; o_Clostridiales; f_; g_; s_                                                        |
| X6fedd2e327d5c758<br>d5df8408295ad0fa | 0.011<br>6787<br>8 | k_Bacteria; p_Firmicutes; c_Clostridia; o_Clostridiales;<br>f_Ruminococcaceae; g_; s_                                      |
| X33518e48b174ac42<br>8cb7be1a216c6c6e | 0.004<br>2330<br>5 | k_Bacteria; p_Firmicutes; c_Clostridia; o_Clostridiales;<br>f_Lachnospiraceae; g_Coprococcus; s_                           |
| X9681441ad736892<br>c2455edc6d137eac1 | 0.004<br>0171      | k_Bacteria; p_Firmicutes; c_Clostridia; o_Clostridiales;<br>f_Ruminococcaceae; g_; s_                                      |
| X3c62c88287f8b9a3<br>a4e0f1bcd7b31b42 | 0.003<br>4542<br>7 | k_Bacteria; p_Firmicutes; c_Clostridia; o_Clostridiales;<br>f_Ruminococcaceae; g_; s_                                      |
| X9253a4863cac514c<br>6004b26d70920768 | 0.003<br>4542<br>7 | k_Bacteria; p_Firmicutes; c_Clostridia; o_Clostridiales;<br>f_Ruminococcaceae; g_; s_                                      |
| X514b19a584ab78d<br>e6179970686a20e8e | 0.002<br>6794<br>7 | k_Bacteria; p_Proteobacteria; c_Gammaproteobacteria;<br>o_Aeromonadales; f_Succinivibrionaceae; g_Ruminobacter; s_         |
| a3ea63b33a623c45f<br>56212bfc2e18b03  | 0.002<br>6794<br>7 | k_Bacteria; p_Proteobacteria; c_Betaproteobacteria;<br>o_Burkholderiales; f_Alcaligenaceae; g_Sutterella; s_               |
| X11899145b894a8b<br>737a8d3db09a78b4f | 0.002<br>3048<br>1 | k_Bacteria; p_Bacteroidetes; c_Bacteroidia; o_Bacteroidales;<br>f_Prevotellaceae; g_Prevotella; s_                         |
| da0953e0b53e5f2bc<br>309110e79c16a40  | 0.002<br>3048<br>1 | k_Bacteria; p_Firmicutes; c_Erysipelotrichi; o_Erysipelotrichales;<br>f_Erysipelotrichaceae; g_RFN20; s_                   |
| bac2ee18181e2b913<br>542342c3aa3f3ed  | 0.000<br>7748      | k_Bacteria; p_Firmicutes; c_Erysipelotrichi; o_Erysipelotrichales;<br>f_Erysipelotrichaceae; g_[Eubacterium]; s_biforme    |
| X70e1cbf5a781d1fd<br>56913a209d394405 | 0.000<br>7748      | k_Bacteria; p_Firmicutes; c_Clostridia; o_Clostridiales;<br>f_Ruminococcaceae; g_; s_                                      |

|                                       |               |                                                                                                           |
|---------------------------------------|---------------|-----------------------------------------------------------------------------------------------------------|
| X8dcfdd3643e8a1b8<br>73a013d7c15804dd | 0.000<br>7748 | k_Bacteria; p_Firmicutes; c_Clostridia; o_Clostridiales;<br>f_Ruminococcaceae; g_Oscillospira; s__        |
| X022e203c0237562<br>b1af030c2cda7cfd9 | 6.80E<br>-17  | k_Fungi;p_unidentified;c_unidentified;o_unidentified;f_unidentifie<br>d;g_unidentified;s_unidentified     |
| X1d90719814d690d<br>70dcf3b29d2ec5fc6 | 3.40E<br>-17  | k_Bacteria; p_Firmicutes; c_Erysipelotrichi; o_Erysipelotrichales;<br>f_Erysipelotrichaceae; g_RFN20; s__ |
| b7bb03f41b2044386<br>d4c609b1085f722  | 3.40E<br>-17  | k_Bacteria; p_Verrucomicrobia; c_Verruco-5; o_WCHB1-41;<br>f_RFP12; g_; s__                               |

Supplementary Table2. Sheet5. Key taxa in Chimpanzee identified based on the network hub score.

| ASV                               | HubS core   | Taxa                                                                                                                        |
|-----------------------------------|-------------|-----------------------------------------------------------------------------------------------------------------------------|
| X1682bc65b78e9a7ba3134434c5ad4763 | 1           | k_Fungi;p_unidentified;c_unidentified;o_unidentified;f_unidentified;g_unidentified;s_unidentified                           |
| X2c76a1fc7302742580bcaf04942aa3dc | 0.940993753 | k_Fungi;p_unidentified;c_unidentified;o_unidentified;f_unidentified;g_unidentified;s_unidentified                           |
| X905b74ba5bd550960038ca6583f52329 | 0.871924211 | k_Fungi;p_unidentified;c_unidentified;o_unidentified;f_unidentified;g_unidentified;s_unidentified                           |
| X8b05add14a66c7c9aac0bd8775bfc41  | 0.674199171 | k_Fungi;p_Ascomycota;c_Sordariomycetes;o_Xylariales;f_Sporocadaceae                                                         |
| X3a439a0e92578bb8f02ffdeefdef664  | 0.629508269 | k_Fungi;p_Ascomycota;c_Sordariomycetes;o_Xylariales                                                                         |
| X543eb306ab15d1b00b591205bb5b62a5 | 0.582365282 | k_Fungi;p_Ascomycota;c_Sordariomycetes;o_Xylariales;f_Sporocadaceae;g_Neopestalotiopsis;s_Neopestalotiopsis_foedans         |
| X16507e25d999abc59217324eaa106635 | 0.439625665 | k_Fungi;p_Ascomycota;c_Sordariomycetes;o_Hypocreales;f_Nectriaceae;g_Fusarium;s_unidentified                                |
| X759c307b9fae00bc323e940bc7f73b6c | 0.42746915  | k_Fungi;p_Ascomycota;c_Saccharomycetes;o_Saccharomycetales;f_Phaffomycetaceae;g_Wickerhamomyces;s_Wickerhamomyces_anomalous |
| b9696e4173211cbb79bfa4c491885670  | 0.422230656 | k_Fungi;p_Ascomycota;c_Sordariomycetes;o_Xylariales;f_Sporocadaceae;g_Pestalotiopsis;s_unidentified                         |
| X94d5072a6162fc603496ac5985ab8f35 | 0.332559484 | k_Bacteria; p_Firmicutes; c_Erysipelotrichi; o_Erysipelotrichales; f_Erysipelotrichaceae                                    |
| X54eabf0be27c3a36c7ac00ff3babb65b | 0.330543989 | k_Bacteria; p_Firmicutes; c_Erysipelotrichi; o_Erysipelotrichales; f_Erysipelotrichaceae; g_Asteroleplasma; s_anaerobium    |
| X7b92c4712a931d594e7980d8c9c878af | 0.314770715 | k_Fungi;p_Ascomycota;c_Dothideomycetes;o_Dothideales;f_Aureobasidiaceae;g_Aureobasidium;s_Aureobasidium_thailandense        |
| dc381f5656999697f8fb2a10b2931ccb  | 0.283118382 | k_Bacteria; p_Tenericutes; c_Mollicutes; o_Acholeplasmatales                                                                |
| X30c03cd3eec63c8d9a6d637f93ca7b9b | 0.272428084 | k_Bacteria; p_Firmicutes; c_Erysipelotrichi; o_Erysipelotrichales; f_Erysipelotrichaceae; g_[Eubacterium]; s_cylindroides   |
| d1551ff4d0702a0f8e0b9ac35a25bf6c  | 0.263185327 | k_Fungi;p_Ascomycota;c_Dothideomycetes;o_Pleosporales;f_Periconiaceae;g_Periconia;s_Periconia_byssoides                     |
| X1a16ebd30229749f56508bfa99c58cae | 0.23727315  | k_Bacteria; p_Firmicutes; c_Erysipelotrichi; o_Erysipelotrichales; f_Erysipelotrichaceae; g_Asteroleplasma; s_anaerobium    |
| X6916d386b67ae389d75219a14bf80740 | 0.234914538 | k_Fungi;p_Ascomycota;c_Dothideomycetes;o_Capnodiales;f_Cladosporiaceae;g_Cladosporium                                       |
| X2bb38254f5f0297a2d6540517a7b009c | 0.227940542 | k_Bacteria; p_Proteobacteria; c_Alphaproteobacteria; o_RF32; f_g; s_                                                        |

|                                           |                     |                                                                                                                      |
|-------------------------------------------|---------------------|----------------------------------------------------------------------------------------------------------------------|
| X1072825caf7aef9a<br>cfeca306fa16b        | 0.220<br>71589<br>7 | k_Fungi;p_Ascomycota;c_Dothideomycetes;o_Pleosporales;f_Didemniaceae;g_Boeremia;s_Boeremia_exigua                    |
| X5579452b3e48a65<br>07174b8add11f30b<br>b | 0.218<br>53473<br>9 | k_Fungi;p_Ascomycota;c_Sordariomycetes;o_Trichosphaeriales;f_Trichosphaeriaceae;g_Nigrospora;s_Nigrospora_oryzae     |
| b8b4e7f53bee3ab1<br>57156e6aa3296055      | 0.216<br>38422<br>4 | k_Bacteria; p_Firmicutes; c_Clostridia; o_Clostridiales; f_Lachnospiraceae; g_; s_                                   |
| X9d05afa2b6632b6<br>6b4a978a211e498e<br>f | 0.214<br>39555<br>4 | k_Bacteria; p_Actinobacteria; c_Coriobacteriia; o_Coriobacteriales; f_Coriobacteriaceae; g_; s_                      |
| f0a78a8aaf56aa578<br>97de30884e8e374      | 0.213<br>24334      | k_Bacteria; p_Verrucomicrobia; c_Verruco-5; o_WCHB1-41; f_RFP12; g_; s_                                              |
| X4969b714968843<br>044292289c42999f<br>85 | 0.209<br>67683<br>3 | k_Fungi;p_Ascomycota;c_Dothideomycetes                                                                               |
| b0aeb5d3ee0bddfec<br>14bece683a41a79      | 0.197<br>87081<br>7 | k_Bacteria; p_Firmicutes; c_Clostridia; o_Clostridiales; f_; g_; s_                                                  |
| X26b0fd3cb468597<br>13999bbf58faea436     | 0.197<br>87081<br>7 | k_Archaea; p_Euryarchaeota; c_Thermoplasmata; o_E2; f_[Methanomassiliococcaceae]; g_vadinCA11; s_                    |
| X2e4f2b53b856c4d<br>ef6d021d01f5abb70     | 0.197<br>53109<br>9 | k_Bacteria; p_Firmicutes; c_Clostridia; o_Clostridiales; f_Lachnospiraceae; g_[Ruminococcus]; s_gnavus               |
| X0f5f4516676336a<br>6d4036cfb9d6bd26<br>9 | 0.197<br>53109<br>9 | k_Bacteria; p_Actinobacteria; c_Coriobacteriia; o_Coriobacteriales; f_Coriobacteriaceae; g_; s_                      |
| c2bf90ec366834cc5<br>9ac912f540e5fd2      | 0.196<br>41376<br>4 | k_Bacteria; p_Firmicutes; c_Clostridia; o_Clostridiales; f_Lachnospiraceae; g_Oribacterium; s_                       |
| X77673dde68d3a9e<br>7de95dce383eb4c7<br>a | 0.184<br>51651<br>2 | k_Bacteria; p_Firmicutes; c_Clostridia; o_Clostridiales; f_[Mogibacteriaceae]; g_; s_                                |
| d5c34a5c01d28b73<br>1f12b218bbd43d75      | 0.150<br>81032<br>9 | k_Bacteria; p_Firmicutes; c_Clostridia; o_Clostridiales; f_Ruminococcaceae; g_; s_                                   |
| X8a7be2a5ee5dbc9<br>748aa8d62232ef51<br>7 | 0.149<br>61616<br>2 | k_Bacteria; p_Spirochaetes; c_Spirochaetes; o_Sphaerochaetales; f_Sphaerochaetaceae; g_Sphaerochaeta; s_             |
| c0db21fc90b9cd7ed<br>694875d1f852ff3      | 0.143<br>55083<br>4 | k_Bacteria; p_Cyanobacteria; c_4C0d-2; o_YS2; f_; g_; s_                                                             |
| X121ce4cb34a821c<br>bfed89ea7fe14a91e     | 0.138<br>78822<br>6 | k_Fungi;p_Ascomycota;c_Dothideomycetes;o_Capnodiales;f_Cladosporiaceae;g_Cladosporium                                |
| X202e47cf9862390<br>db2821ac92ad562e<br>0 | 0.131<br>67791<br>5 | k_Bacteria; p_Bacteroidetes; c_Bacteroidia; o_Bacteroidales; f_[Paraprevotellaceae]; g_YRC22; s_                     |
| a2d300d1e9c621db<br>c5239cc092d433c3      | 0.128<br>59903      | k_Bacteria; p_Firmicutes; c_Clostridia; o_Clostridiales; f_; g_; s_                                                  |
| X85a8502c1faf8a0e<br>682c1c689fbd1c8      | 0.126<br>80610<br>5 | k_Fungi;p_Ascomycota;c_Dothideomycetes;o_Pleosporales;f_Didemniaceae;g_Alloconiothyrium;s_Alloconiothyrium_aprototii |
| X72fd2576530aaa7<br>0b72a2006cf53014<br>c | 0.121<br>98287<br>4 | k_Bacteria; p_Tenericutes; c_Mollicutes; o_Anaeroplasmatales; f_Anaeroplasmataceae; g_; s_                           |

|                                   |                     |                                                                                                                  |
|-----------------------------------|---------------------|------------------------------------------------------------------------------------------------------------------|
| bb7bb46bb34c7f3d794d9478106efa85  | 0.116<br>92144<br>6 | k_Bacteria; p_Verrucomicrobia; c_Verruco-5; o_WCHB1-41; f_RFP12; g_; s_                                          |
| fd53879206e220088465f824f06579e8  | 0.110<br>17754<br>2 | k_Bacteria; p_Firmicutes; c_Clostridia; o_Clostridiales; f_; g_; s_                                              |
| ff2c9c54fc9c496e68a13025bb4acfa2  | 0.107<br>63168<br>2 | k_Bacteria; p_Tenericutes; c_Mollicutes; o_RF39; f_; g_; s_                                                      |
| X1f273a9cf201f75859455ab67d5e123b | 0.105<br>33427<br>5 | k_Bacteria                                                                                                       |
| df544d84ee7ef1afbc66210d1706fff8  | 0.103<br>37114<br>2 | k_Bacteria; p_Actinobacteria; c_Coriobacteriia; o_Coriobacteriales; f_Coriobacteriaceae; g_; s_                  |
| a171d6b000917ac0e0a39cb0c8b2fc1b  | 0.103<br>20049<br>4 | k_Fungi; p_Ascomycota; c_Dothideomycetes; o_Botryosphaeriales; f_Botryosphaeriaceae; g_Lasiodiplodia             |
| X4a0b292ba716582f9af46694458c0b9b | 0.101<br>26847<br>3 | k_Bacteria; p_Cyanobacteria; c_Chloroplast; o_Streptophyta; f_; g_; s_                                           |
| X34bf4e2da6fa3ee1569de7b788f44d8e | 0.099<br>26894<br>7 | k_Bacteria; p_Bacteroidetes; c_Bacteroidia; o_Bacteroidales; f_Prevotellaceae; g_Prevotella; s_                  |
| X92186ee2c33d31b5787c594e18fb8fa9 | 0.088<br>39128<br>5 | k_Bacteria; p_Bacteroidetes; c_Bacteroidia; o_Bacteroidales; f_Prevotellaceae; g_Prevotella; s_copri             |
| X7242dd3e8dfdf19374b99109f0eccd19 | 0.088<br>39128<br>5 | k_Bacteria; p_TM7; c_TM7-3; o_CW040; f_F16; g_; s_                                                               |
| X62b5223d4d79e28288ee4daa241352f1 | 0.087<br>28218<br>6 | k_Bacteria; p_Firmicutes; c_Clostridia; o_Clostridiales; f_Veillonellaceae; g_Dialister; s_                      |
| cd03e9d7569ffc8418ba9676033cbaf7  | 0.087<br>28218<br>6 | k_Bacteria; p_Firmicutes; c_Clostridia; o_Clostridiales; f_; g_; s_                                              |
| aae4c4ed528ae16ec417df816699cfdb  | 0.086<br>86835<br>2 | k_Bacteria; p_Firmicutes; c_Clostridia; o_Clostridiales; f_Ruminococcaceae; g_; s_                               |
| X9612ad0ea299179204ad654e41183f49 | 0.086<br>22429<br>6 | k_Fungi; p_Ascomycota; c_Dothideomycetes; o_Capnodiales; f_Mycosphaerellaceae; g_Passalora; s_Passalora_perplexa |
| d21710911b184d6ee705efbd62291d6   | 0.081<br>75105<br>2 | k_Fungi; p_Ascomycota; c_Dothideomycetes; o_Pleosporales; f_Didymosphaeriaceae                                   |
| X19d7214df21f837591c11e7a9e12f1c6 | 0.079<br>52831      | k_Bacteria; p_Bacteroidetes; c_Bacteroidia; o_Bacteroidales; f_Prevotellaceae; g_Prevotella; s_                  |
| f6be8fd3434273e20c0b5a1461ee3c85  | 0.070<br>34361<br>4 | k_Bacteria; p_Firmicutes; c_Clostridia; o_Clostridiales; f_; g_; s_                                              |
| d80066763c0ef01e9782b7db1272e31f  | 0.070<br>2543       | k_Bacteria; p_Bacteroidetes; c_Bacteroidia; o_Bacteroidales; f_Prevotellaceae; g_; s_                            |
| e865f29a716e8d51f83931befa951240  | 0.069<br>56771<br>6 | k_Bacteria; p_Firmicutes; c_Erysipelotrichi; o_Erysipelotrichales; f_Erysipelotrichaceae; g_; s_                 |
| b494a8d807d2fb57fd2d9d828ef8552d  | 0.068<br>54595<br>9 | k_Bacteria; p_Tenericutes; c_Mollicutes; o_RF39; f_; g_; s_                                                      |



|                                    |             |                                                                                                                          |
|------------------------------------|-------------|--------------------------------------------------------------------------------------------------------------------------|
| X37f004671c936285c26471120596b2f5  | 0.068545959 | k_Bacteria; p_Firmicutes; c_Clostridia; o_Clostridiales; f_Clostridiaceae; g_Sarcina; s__                                |
| X0563d6ca03c8b32f7003744172f738d3  | 0.066192902 | k_Bacteria; p_Bacteroidetes; c_Bacteroidia; o_Bacteroidales; f__; g__; s__                                               |
| X74b7dbcd58dc83617d1a82d321245a1e  | 0.065939014 | k_Bacteria; p_Spirochaetes; c_Spirochaetes; o_Spirochaetales; f_Spirochaetaceae; g_Treponema; s__                        |
| X79a2ad292bd3e1f5e872294165fc7fee  | 0.061334301 | k_Bacteria; p_Verrucomicrobia; c_Verruco-5; o_WCHB1-41; f_RFP12; g__; s__                                                |
| X4bc284bffb22616e035ba6ba03948917  | 0.061334301 | k_Bacteria; p_Firmicutes; c_Clostridia; o_Clostridiales; f_Lachnospiraceae; g__; s__                                     |
| X6a45e7962527c5d81859f75647fd376f  | 0.061334301 | k_Bacteria; p_Firmicutes; c_Clostridia; o_Clostridiales; f__; g__; s__                                                   |
| ba00d2e0c74c53a4f32a5b6c48859a9c   | 0.060994583 | k_Bacteria; p_Bacteroidetes; c_Bacteroidia; o_Bacteroidales; f_Prevotellaceae; g_Prevotella; s__                         |
| X18e0a23e81430f15c9040071fef9b478  | 0.060994583 | k_Bacteria; p_Firmicutes; c_Erysipelotrichi; o_Erysipelotrichales; f_Erysipelotrichaceae; g_Asteroleplasma; s_anaerobium |
| X56a8014ee62437086dba0e4bc05e192c  | 0.060994583 | k_Bacteria; p_Firmicutes; c_Clostridia; o_Clostridiales; f__; g__; s__                                                   |
| eafa0985b50a707247b37e92ab00f16c   | 0.060994583 | k_Bacteria; p_Bacteroidetes; c_Bacteroidia; o_Bacteroidales; f__; g__; s__                                               |
| X646c60019eae06733055ec4c46643011  | 0.060994583 | k_Bacteria; p_Firmicutes; c_Clostridia; o_Clostridiales; f_Ruminococcaceae; g__; s__                                     |
| X2c737630a237bcd b4fa848e5fe047e0b | 0.05289211  | k_Fungi; p_Ascomycota; c_Dothideomycetes; o_Pleosporales; f_Didymosphaeriaceae                                           |
| X033f44f6ab9e723489b1802782125bc0  | 0.046235345 | k_Bacteria; p_Actinobacteria; c_Coriobacteriia; o_Coriobacteriales; f_Coriobacteriaceae; g__; s__                        |
| X6fdb85b72abc94a4a93a9f2bd9294718  | 0.040965679 | k_Bacteria; p_Firmicutes; c_Clostridia; o_Clostridiales; f_Lachnospiraceae; g__; s__                                     |
| X50f48be0c99ba0de46f584073eca2397  | 0.040965679 | k_Bacteria; p_Firmicutes; c_Clostridia; o_Clostridiales; f_Ruminococcaceae; g__; s__                                     |
| X0a7fe3595e40caea fecb26f55ecf526d | 0.040110046 | k_Fungi; p_Ascomycota; c_Dothideomycetes; o_Capnodiales; f_Cladosporiaceae; g_Cladosporium                               |
| X6517fc81700d85e49ca3f67af1169049  | 0.03983259  | k_Bacteria; p_Lentisphaerae; c_[Lentisphaeria]; o_Z20; f_R4-45B; g__; s__                                                |
| X0890ba8b8ffaf51f54ceab56a836435   | 0.035451895 | k_Bacteria; p_Firmicutes; c_Clostridia; o_Clostridiales; f_Veillonellaceae; g_Dialister; s__                             |
| X95636cde183c77c2a0109d48f419d158  | 0.034039361 | k_Bacteria; p_Firmicutes; c_Clostridia; o_Clostridiales; f__; g__; s__                                                   |
| X4f120ddf78e0d768e7b70f4d08985ea2  | 0.033842572 | k_Bacteria; p_Verrucomicrobia; c_Verruco-5; o_WCHB1-41; f_RFP12; g__; s__                                                |

|                                   |             |                                                                                                                        |
|-----------------------------------|-------------|------------------------------------------------------------------------------------------------------------------------|
| f27951ed312a5764b0edb9f6d4eb2e5b  | 0.033746344 | k_Bacteria; p_Bacteroidetes; c_Bacteroidia; o_Bacteroidales; f_RF16; g_; s_                                            |
| X0777120ba507788e1ede4ee5b1b280cd | 0.030924858 | k_Bacteria; p_Firmicutes; c_Clostridia; o_Clostridiales; f_; g_; s_                                                    |
| X4934539d520aaa8493aa9e1fc6ee22e5 | 0.030924858 | k_Bacteria; p_Actinobacteria; c_Coriobacteriia; o_Coriobacteriales; f_Coriobacteriaceae; g_; s_                        |
| X9de8773c1e0312e45765aef7d2f0e14b | 0.030924858 | k_Bacteria; p_Bacteroidetes; c_Bacteroidia; o_Bacteroidales                                                            |
| aa9a76f47ffd50253f375650a03efd1c  | 0.03027538  | k_Bacteria; p_Firmicutes; c_Clostridia; o_Clostridiales                                                                |
| d06eb6064ab56f92985e11b40b0ecb54  | 0.030069725 | k_Bacteria; p_Bacteroidetes; c_Bacteroidia; o_Bacteroidales; f_; g_; s_                                                |
| X274d44a105684512d6df0a983a5b6663 | 0.030069725 | k_Bacteria; p_Firmicutes; c_Clostridia; o_Clostridiales; f_Clostridiaceae; g_02d06; s_                                 |
| X43fe08d52469682ebddda3177c2d0f9  | 0.030069725 | k_Bacteria; p_Bacteroidetes; c_Bacteroidia; o_Bacteroidales; f_; g_; s_                                                |
| X168b33d848098ec8aa791e9ccda5b926 | 0.030069725 | k_Archaea; p_Euryarchaeota; c_Thermoplasmata; o_E2; f_[Methanomassiliococcaceae]; g_vadinCA11; s_                      |
| ca164e68ce5db67ae0182d9c3bafc5fa  | 0.02970123  | k_Bacteria; p_Firmicutes; c_Clostridia; o_Clostridiales; f_Christensenellaceae; g_; s_                                 |
| X2d1905db9c96d6429c3f04e1ed4f718f | 0.028276273 | k_Bacteria; p_Bacteroidetes; c_Bacteroidia; o_Bacteroidales; f_[Paraprevotellaceae]; g_YRC22; s_                       |
| X52cdc265412299f4b1520f751a1f185a | 0.028276273 | k_Bacteria; p_Firmicutes; c_Clostridia; o_Clostridiales; f_Ruminococcaceae; g_Ruminococcus; s_flavefaciens             |
| X2dce8db2501d65ce638c43b33f8ca0b6 | 0.028207438 | k_Bacteria; p_Bacteroidetes; c_Bacteroidia; o_Bacteroidales; f_Prevotellaceae; g_Prevotella; s_                        |
| ca6a6f92951f0313a72f4d332b4a5006  | 0.027433407 | k_Bacteria; p_Bacteroidetes; c_Bacteroidia; o_Bacteroidales; f_RF16; g_; s_                                            |
| X740df5c41344bf38464fc7ebfdbf8a77 | 0.026287603 | k_Bacteria; p_Bacteroidetes; c_Bacteroidia; o_Bacteroidales; f_[Paraprevotellaceae]; g_; s_                            |
| X46b6b6856a2e1567e55108a860b62f08 | 0.026287603 | k_Bacteria; p_Firmicutes; c_Clostridia; o_Clostridiales; f_Lachnospiraceae; g_Oribacterium; s_                         |
| a891fb44241e433fa8acf251ef4d328f  | 0.026287603 | k_Bacteria; p_Firmicutes; c_Clostridia; o_Clostridiales; f_Lachnospiraceae; g_; s_                                     |
| X311af65847e08e70a5d00e59a36bb8ef | 0.025444737 | k_Bacteria; p_Proteobacteria; c_Epsilonproteobacteria; o_Campylobacteriales; f_Campylobacteraceae; g_Campylobacter; s_ |
| X6d757dde747b98331cd126b525172bd7 | 0.025444737 | k_Bacteria; p_Firmicutes; c_Erysipelotrichi; o_Erysipelotrichales; f_Erysipelotrichaceae; g_RFN20; s_                  |
| X96c7a46d58fffc47ecc1cf2fb033f11  | 0.025444737 | k_Bacteria; p_Firmicutes; c_Clostridia; o_Clostridiales; f_Ruminococcaceae; g_; s_                                     |

|                                           |                     |                                                                                                                         |
|-------------------------------------------|---------------------|-------------------------------------------------------------------------------------------------------------------------|
| X6cabec667e80dda<br>2f9a2b640df76b9d0     | 0.024<br>26407<br>2 | k_Bacteria; p_Firmicutes; c_Erysipelotrichi; o_Erysipelotrichales;<br>f_Erysipelotrichaceae; g_RFN20; s_                |
| X00a96fbd0ac34bfd<br>245f9c24f8737f7d     | 0.024<br>26407<br>2 | k_Bacteria; p_Firmicutes; c_Clostridia; o_Clostridiales;<br>f_Lachnospiraceae; g_Blautia; s_obeum                       |
| b1ee18482360ed4b<br>9c6bbd4de6b1f8d1      | 0.024<br>26407<br>2 | k_Bacteria; p_Firmicutes; c_Clostridia; o_Clostridiales;<br>f_Lachnospiraceae; g_; s_                                   |
| caee7bc24a3a5ac8c<br>2919c247de232c9      | 0.024<br>26407<br>2 | k_Bacteria; p_Firmicutes; c_Erysipelotrichi; o_Erysipelotrichales;<br>f_Erysipelotrichaceae; g_Bulleidia; s_p-1630-c5   |
| X74cab2281116a65<br>629f10e53adbaf70      | 0.023<br>78423<br>3 | k_Bacteria; p_Bacteroidetes; c_Bacteroidia; o_Bacteroidales;<br>f_[Paraprevotellaceae]; g_; s_                          |
| X927b104e3bc0dc5<br>38716b193b41a211<br>b | 0.023<br>66942<br>6 | k_Bacteria; p_Verrucomicrobia; c_Verruco-5; o_WCHB1-41;<br>f_RFP12; g_; s_                                              |
| X38fc79d76b28e16<br>985c969515dacb6d<br>8 | 0.022<br>86953<br>4 | k_Bacteria; p_Firmicutes; c_Erysipelotrichi; o_Erysipelotrichales;<br>f_Erysipelotrichaceae; g_p-75-a5; s_              |
| X847dd19dd00c438<br>10f3051cf594a1a77     | 0.022<br>78545      | k_Bacteria                                                                                                              |
| f13b7ca216600d3cc<br>3b0e6a56ef0e09b      | 0.022<br>14211      | k_Bacteria; p_Firmicutes; c_Erysipelotrichi; o_Erysipelotrichales;<br>f_Erysipelotrichaceae; g_; s_                     |
| X5b65913d3c536b4<br>c350f284f72f72266     | 0.019<br>24657<br>6 | k_Bacteria; p_; c_; o_; f_; g_; s_                                                                                      |
| f269348cc063f545c<br>a6552393a42a6e2      | 0.018<br>51340<br>7 | k_Bacteria; p_Verrucomicrobia; c_Opitutae; o_[Cerasicoccales];<br>f_[Cerasicoccaceae]; g_; s_                           |
| X19dea030b1c9741<br>f5a6dad4250b7b5f6     | 0.018<br>51340<br>7 | k_Bacteria; p_Spirochaetes; c_Spirochaetes; o_Sphaerochaetales;<br>f_Sphaerochaetaceae; g_Sphaerochaeta; s_             |
| X3903585322b1fab<br>d7ee0672e2dcf8701     | 0.018<br>51340<br>7 | k_Bacteria; p_Proteobacteria; c_Betaproteobacteria;<br>o_Burkholderiales; f_Alcaligenaceae; g_Sutterella; s_            |
| X6cec9979c3e76d4<br>316a289bf1792356f     | 0.018<br>51340<br>7 | k_Bacteria; p_Proteobacteria; c_Betaproteobacteria;<br>o_Burkholderiales; f_Alcaligenaceae; g_Sutterella; s_            |
| X6d92f62973cac2e8<br>00df70551c1ffbd8     | 0.018<br>51340<br>7 | k_Bacteria; p_Firmicutes; c_Erysipelotrichi; o_Erysipelotrichales;<br>f_Erysipelotrichaceae; g_[Eubacterium]; s_biforme |
| X68b655ce0b3de7d<br>a0db0b3b6869b440<br>d | 0.016<br>52473<br>8 | k_Bacteria; p_Actinobacteria; c_Coriobacteriia; o_Coriobacteriales;<br>f_Coriobacteriaceae; g_; s_                      |
| a18c0c17fce3d52dc<br>60506e8730bc996      | 0.016<br>52473<br>8 | k_Bacteria; p_Firmicutes; c_Clostridia; o_Clostridiales;<br>f_Ruminococcaceae                                           |
| X197575c617ca3ab<br>2b6561e1c14b8750<br>7 | 0.016<br>52473<br>8 | k_Bacteria; p_Actinobacteria; c_Coriobacteriia; o_Coriobacteriales;<br>f_Coriobacteriaceae; g_Adlercreutzia; s_         |
| X2b302c2965a3228<br>5467d1c3930d5ce2<br>b | 0.016<br>52473<br>8 | k_Bacteria; p_Verrucomicrobia; c_Verruco-5; o_WCHB1-41;<br>f_RFP12; g_; s_                                              |
| X63006813a2e59cd<br>0d5424633377e8db<br>2 | 0.016<br>17949<br>5 | k_Bacteria; p_Chloroflexi; c_Anaerolineae; o_Anaerolineales;<br>f_Anaerolinaceae; g_SHD-231; s_                         |

|                                   |                     |                                                                                                                           |
|-----------------------------------|---------------------|---------------------------------------------------------------------------------------------------------------------------|
| X8e100aace26401d737b2b1b49df77673 | 0.015<br>52595<br>4 | k_Bacteria; p_Firmicutes; c_Clostridia; o_Clostridiales; f_Lachnospiraceae; g_; s__                                       |
| X656fc22d077cc5d6ef83285bcd081cbe | 0.015<br>52595<br>4 | k_Bacteria; p_Proteobacteria; c_Alphaproteobacteria; o_RF32; f_; g_; s__                                                  |
| eff99032d2e35a979c83a1273f3f739d  | 0.014<br>74942<br>6 | k_Archaea; p_Euryarchaeota; c_Methanobacteria; o_Methanobacteriales; f_Methanobacteriaceae; g_Methanobrevibacter; s__     |
| fa4231d184b1582773f6d5ca65fe51f4  | 0.014<br>33194      | k_Fungi;p_Ascomycota;c_Dothideomycetes;o_Botryosphaeriales;f_Aplosporellaceae;g_Aplosporella                              |
| X4db84fa02ed703c170eda12a634e2abe | 0.013<br>32482<br>4 | k_Bacteria; p_Firmicutes; c_Clostridia; o_Clostridiales; f_Ruminococcaceae; g_; s__                                       |
| b0f1939a709af729120ace2bf4a973c9  | 0.011<br>74148<br>5 | k_Bacteria; p_Bacteroidetes; c_Bacteroidia; o_Bacteroidales; f_Prevotellaceae; g_Prevotella; s__                          |
| X90ba8ba071ad1adb1b1ea3f783d64b12 | 0.010<br>49028<br>9 | k_Bacteria; p_Bacteroidetes; c_Bacteroidia; o_Bacteroidales; f_Prevotellaceae; g_Prevotella; s__                          |
| X3e4fa97314839bb499633b9156f9ee5a | 0.010<br>34100<br>8 | k_Fungi;p_Ascomycota;c_Dothideomycetes;o_Capnodiales;f_Cladosporiaceae;g_Cladosporium                                     |
| d6cd19c0894d78aaada198c572506a71  | 0.010<br>08098<br>1 | k_Bacteria; p_Firmicutes; c_Erysipelotrichi; o_Erysipelotrichales; f_Erysipelotrichaceae; g_RFN20; s__                    |
| X017570ebc40035b4e9c2e5d3e3dfc05  | 0.009<br>76286<br>5 | k_Bacteria; p_Spirochaetes; c_Spirochaetes; o_Sphaerochaetales; f_Sphaerochaetaceae; g_Sphaerochaeta; s__                 |
| fd408d248a5bc3d4bf358d58f8e0ce2c  | 0.008<br>92         | k_Archaea; p_Euryarchaeota; c_Thermoplasmata; o_E2; f_[Methanomassiliococcaceae]; g_vadinCA11; s__                        |
| fd325e685fae520777942e25af2d6ee0  | 0.008<br>92         | k_Bacteria; p_Proteobacteria; c_Deltaproteobacteria; o_Desulfovibrionales; f_Desulfovibrionaceae; g_Desulfovibrio; s_D168 |
| e63f7e072b2de3bbaf23e446796d7acd  | 0.008<br>92         | k_Bacteria; p_Spirochaetes; c_Spirochaetes; o_Spirochaetales; f_Spirochaetaceae; g_Treponema; s__                         |
| X6997eb891780dac0114c005b4ceccd72 | 0.008<br>92         | k_Bacteria; p_Bacteroidetes; c_Bacteroidia; o_Bacteroidales; f_[Paraprevotellaceae]; g_[Prevotella]; s__                  |
| ea626bd8ae7b37fe0cade0ae60e9cbda  | 0.008<br>92         | k_Bacteria; p_Bacteroidetes; c_Bacteroidia; o_Bacteroidales; f_[Paraprevotellaceae]; g_YRC22; s__                         |
| X185ea5c8c2f93c50339d283ab1ecfeb  | 0.008<br>92         | k_Bacteria; p_Bacteroidetes; c_Bacteroidia; o_Bacteroidales; f_; g_; s__                                                  |
| X8feadd6e25ff93f26d31da82c2f30819 | 0.008<br>92         | k_Bacteria; p_Bacteroidetes; c_Bacteroidia; o_Bacteroidales                                                               |
| X0a68ec564e278b0246c920ad7de41880 | 0.008<br>92         | k_Bacteria; p_Firmicutes; c_Clostridia; o_Clostridiales; f_Lachnospiraceae; g_Blautia; s__                                |
| a46b89f8bd35cec94fa7986c221e6a8f  | 0.008<br>92         | k_Bacteria; p_Bacteroidetes; c_Bacteroidia; o_Bacteroidales; f_; g_; s__                                                  |
| b4e1107ef19fa11e16b0aa4873de331a  | 0.008<br>92         | k_Bacteria; p_Firmicutes; c_Clostridia; o_Clostridiales; f_; g_; s__                                                      |
| eb19ee5d5f64be63a0baf81435d48434  | 0.008<br>92         | k_Bacteria; p_Firmicutes; c_Clostridia; o_Clostridiales; f_Ruminococcaceae; g_; s__                                       |
| X94971b5330b72e64e7fe0fafda7a8c1f | 0.008<br>92         | k_Bacteria; p_Bacteroidetes; c_Bacteroidia; o_Bacteroidales; f_Prevotellaceae; g_Prevotella; s__                          |
| b726627e18f29e0da5289f81ca294f92  | 0.008<br>92         | k_Bacteria; p_Firmicutes; c_Clostridia; o_Clostridiales; f_Ruminococcaceae                                                |

|                                           |                     |                                                                                                                 |
|-------------------------------------------|---------------------|-----------------------------------------------------------------------------------------------------------------|
| X80f23fe302e867ca<br>241bbbb9773880fe     | 0.007<br>25949<br>6 | k_Bacteria; p_Firmicutes; c_Clostridia; o_Clostridiales;<br>f_Lachnospiraceae; g_; s_                           |
| dda67a36816073f1<br>8ab90d79033aa821      | 0.007<br>25949<br>6 | k_Bacteria; p_Firmicutes; c_Clostridia; o_Clostridiales;<br>f_Ruminococcaceae; g_; s_                           |
| X1062c3cd6278777<br>91824f2c58794eed<br>2 | 0.007<br>25949<br>6 | k_Bacteria; p_Firmicutes; c_Erysipelotrichi; o_Erysipelotrichales;<br>f_Erysipelotrichaceae; g_RFN20; s_        |
| X923eb6134727a20<br>b2fd6d2da910fa20d     | 0.006<br>06532<br>9 | k_Bacteria; p_Tenericutes; c_Mollicutes; o_Anaeroplasmatales;<br>f_Anaeroplasmataceae; g_; s_                   |
| X6e15035874a659b<br>c18efcc98b983b4f4     | 0.005<br>75066<br>4 | k_Bacteria; p_Verrucomicrobia; c_Verruco-5; o_WCHB1-41;<br>f_RFP12; g_; s_                                      |
| X2393b358b70b80<br>7e64b122d71982aa<br>f3 | 0.005<br>75066<br>4 | k_Bacteria; p_Actinobacteria; c_Coriobacteriia; o_Coriobacteriales;<br>f_Coriobacteriaceae; g_Collinsella; s_   |
| X242e2043679cb2e<br>44a5c3f3189184b4<br>2 | 0.005<br>75066<br>4 | k_Bacteria; p_Firmicutes; c_Erysipelotrichi; o_Erysipelotrichales;<br>f_Erysipelotrichaceae; g_Bulleidia; s_    |
| c0241dff3c50c2bd8<br>484d30accbba2a       | 0.003<br>72062<br>2 | k_Bacteria; p_Cyanobacteria; c_4C0d-2; o_YS2; f_; g_; s_                                                        |
| X0e59a95a37ad275<br>8e345f0bbd32d55a<br>4 | 0.003<br>72062<br>2 | k_Bacteria; p_Actinobacteria; c_Coriobacteriia; o_Coriobacteriales;<br>f_Coriobacteriaceae; g_; s_              |
| X67470a0c54968e6<br>7640a99a3278b2df<br>0 | 0.003<br>72062<br>2 | k_Bacteria; p_Actinobacteria; c_Actinobacteria; o_Bifidobacteriales;<br>f_Bifidobacteriaceae; g_; s_            |
| d6f3aa6bc341f8813<br>9ad91564cceb0c3      | 0.003<br>72062<br>2 | k_Bacteria; p_Actinobacteria; c_Coriobacteriia; o_Coriobacteriales;<br>f_Coriobacteriaceae; g_; s_              |
| X43f56e23a3e9dfa0<br>ee5916032e44b6f4     | 0.003<br>72062<br>2 | k_Bacteria; p_Firmicutes; c_Clostridia; o_Clostridiales;<br>f_Ruminococcaceae; g_; s_                           |
| X21e391c46c36281<br>c329617ce01b55fe0     | 0.003<br>72062<br>2 | k_Bacteria; p_Verrucomicrobia; c_Verruco-5; o_WCHB1-41;<br>f_RFP12; g_; s_                                      |
| X6f43ce86c60a2147<br>e9f5fd2f633aa885     | 0.002<br>82148<br>6 | k_Bacteria; p_Bacteroidetes; c_Bacteroidia; o_Bacteroidales;<br>f_Porphyrimonadaceae; g_Parabacteroides; s_     |
| X9192b3275c36e56<br>540678451adfa601f     | 0.002<br>82148<br>6 | k_Bacteria; p_Firmicutes; c_Clostridia; o_Clostridiales;<br>f_Ruminococcaceae                                   |
| X4d967e590e97670<br>40a1bd394a3de1ef<br>7 | 0.001<br>02878<br>5 | k_Bacteria; p_Firmicutes; c_Clostridia; o_Clostridiales;<br>f_Lachnospiraceae                                   |
| X54947f672cc0937<br>28ece078418837f8<br>2 | 0.001<br>00816      | k_Bacteria; p_Spirochaetes; c_Spirochaetes; o_Sphaerochaetales;<br>f_Sphaerochaetaceae; g_Sphaerochaeta; s_     |
| c99d06b3b7c5b133<br>e4406b29dce4d7cd      | 0.001<br>00816      | k_Bacteria; p_Actinobacteria; c_Coriobacteriia; o_Coriobacteriales;<br>f_Coriobacteriaceae; g_Adlercreutzia; s_ |
| X94a302cc7a648f23<br>c27353f085b24e06     | 0.001<br>00816      | k_Bacteria; p_Firmicutes; c_Clostridia; o_Clostridiales;<br>f_Veillonellaceae; g_Anaerovibrio; s_               |
| X0332ce7f5e6cfa9c<br>1db043e2ef4f70e5     | 0.000<br>74294      | k_Bacteria; p_Firmicutes; c_Clostridia; o_Clostridiales;<br>f_Ruminococcaceae; g_Ruminococcus; s_               |

|                                           |                     |                                                                                                                        |
|-------------------------------------------|---------------------|------------------------------------------------------------------------------------------------------------------------|
| b1b0fe59b639bd6a<br>a16bb11b28bfd06e      | 0.000<br>72742<br>4 | k_Archaea; p_Euryarchaeota; c_Methanobacteria;<br>o_Methanobacteriales; f_Methanobacteriaceae; g_Methanosphaera;<br>s_ |
| X42457fbfa9a7109e<br>71cf5dab55aafa0e     | 0.000<br>72742<br>4 | k_Bacteria; p_Firmicutes; c_Erysipelotrichi; o_Erysipelotrichales;<br>f_Erysipelotrichaceae; g_RFN20; s_               |
| a104cdb42c20a3d7<br>9353827c47a81212      | 0.000<br>72742<br>4 | k_Bacteria; p_Bacteroidetes; c_Bacteroidia; o_Bacteroidales;<br>f_Prevotellaceae; g_Prevotella; s_                     |
| X5d6ba04b036af82<br>be19961e4d19d15d<br>d | 0.000<br>29319<br>7 | k_Fungi;p_Ascomycota;c_Sordariomycetes;o_Trichosphaeriales;f_<br>Trichosphaeriaceae;g_Nigrospora;s_Nigrospora_oryzae   |
| X288359d621a383c<br>1e46f0c041866024<br>2 | 0.000<br>22057<br>7 | k_Fungi;p_Ascomycota;c_Dothideomycetes;o_Botryosphaeriales;f_<br>Botryosphaeriaceae;g_Lasiodiplodia                    |
| bccc0003db434662<br>0e231e2e5ebe7af3      | 1.55E-<br>05        | k_Bacteria; p_Firmicutes; c_Clostridia; o_Clostridiales                                                                |
| X90762fb257f23f6d<br>1320d750f166d48b     | 1.55E-<br>05        | k_Bacteria; p_Firmicutes; c_Clostridia; o_Clostridiales;<br>f_Ruminococcaceae; g_; s_                                  |

Supplementary Table2. Sheet6. Key taxa in Mangabey identified based on the network hub score.

| ASV                               | HubScore    | Taxa                                                                                                                         |
|-----------------------------------|-------------|------------------------------------------------------------------------------------------------------------------------------|
| X349193569e3248c780770d1861ce93bb | 1           | k_Bacteria; p_Bacteroidetes; c_Bacteroidia; o_Bacteroidales; f_Prevotellaceae; g_Prevotella; s_                              |
| X5ab7bae3d45cdd5979aeda9bbe636210 | 0.967668044 | k_Bacteria; p_Firmicutes; c_Clostridia; o_Clostridiales; f_Ruminococcaceae                                                   |
| X6420671c26eef32065e0275c8cd6701e | 0.967668044 | k_Bacteria; p_Firmicutes; c_Clostridia; o_Clostridiales; f_Peptostreptococcaceae                                             |
| da6a7cba87e0895b9cbe6037b9bd8b3b  | 0.967668044 | k_Bacteria; p_Bacteroidetes; c_Bacteroidia; o_Bacteroidales; f_Prevotellaceae; g_Prevotella; s_copri                         |
| X7fd072aff74564746d11ca0c54ee6ae2 | 0.943720426 | k_Bacteria; p_Tenericutes; c_RF3; o_ML615J-28; f_ ; g_ ; s_                                                                  |
| e865f29a716e8d51f83931befa951240  | 0.943720426 | k_Bacteria; p_Firmicutes; c_Erysipelotrichi; o_Erysipelotrichales; f_Erysipelotrichaceae; g_ ; s_                            |
| d54f71f28a2092111fd16b901d39254c  | 0.872182181 | k_Bacteria; p_Firmicutes; c_Clostridia; o_Clostridiales; f_[Mogibacteriaceae]; g_ ; s_                                       |
| X3b3f9c7bb2ca421e0c31645737223b39 | 0.872182181 | k_Bacteria; p_Verrucomicrobia; c_Verruco-5; o_WCHB1-41; f_RFP12; g_ ; s_                                                     |
| X26c910e914551d2c61538c1d0418e56d | 0.872182181 | k_Bacteria; p_Firmicutes; c_Clostridia; o_Clostridiales; f_Ruminococcaceae; g_ ; s_                                          |
| e2f5328726e4b0bb7e365a0c1d9e85b7  | 0.872182181 | k_Bacteria; p_Firmicutes; c_Clostridia; o_Clostridiales; f_Ruminococcaceae; g_ ; s_                                          |
| X13e5e67a2599db5c3cdfa82c4c9ea6fd | 0.872182181 | k_Bacteria; p_Firmicutes; c_Clostridia; o_Clostridiales; f_Ruminococcaceae; g_ ; s_                                          |
| X7327a55af477aa89dc73611f2806c3e9 | 0.872182181 | k_Bacteria; p_Firmicutes; c_Clostridia; o_Clostridiales; f_Ruminococcaceae; g_ ; s_                                          |
| daaca63ff109dd6819af95c487d9314e  | 0.872182181 | k_Bacteria; p_Firmicutes; c_Bacilli; o_Lactobacillales; f_Lactobacillaceae; g_Lactobacillus; s_ruminis                       |
| X33518e48b174ac428cb7be1a216c6c6e | 0.689880742 | k_Bacteria; p_Firmicutes; c_Clostridia; o_Clostridiales; f_Lachnospiraceae; g_Coprococcus; s_                                |
| X2ee8f2b3ab2530d891e82c4e2d48f761 | 0.656603123 | k_Bacteria; p_Firmicutes; c_Clostridia; o_Clostridiales; f_ ; g_ ; s_                                                        |
| X6fb70d8c2aa551fc31eb19afebf7d74e | 0.656603123 | k_Bacteria; p_Bacteroidetes; c_Bacteroidia; o_Bacteroidales; f_Prevotellaceae; g_Prevotella; s_                              |
| X6d4e639b81485e3714ccdc9ffa6a147b | 0.618342496 | k_Bacteria; p_Firmicutes; c_Erysipelotrichi; o_Erysipelotrichales; f_Erysipelotrichaceae; g_ ; s_                            |
| X30af5a573043a5f612bbfee09a38ef0f | 0.618342496 | k_Bacteria; p_Firmicutes; c_Clostridia; o_Clostridiales; f_[Mogibacteriaceae]; g_ ; s_                                       |
| X35cbb315e019e0a8768d4b73862df415 | 0.618342496 | k_Bacteria; p_Actinobacteria; c_Coriobacteriia; o_Coriobacteriales; f_Coriobacteriaceae; g_Collinsella; s_aerofaciens        |
| X54a2bfb0a96adc52c4ccca239ad01466 | 0.590506494 | k_Bacteria; p_Firmicutes; c_Clostridia; o_Clostridiales; f_Ruminococcaceae; g_Ruminococcus; s_                               |
| X65990c74559e4adfaa672a884ad7d464 | 0.590506494 | k_Bacteria; p_Firmicutes; c_Clostridia; o_Clostridiales; f_Lachnospiraceae; g_Coprococcus; s_catus                           |
| X025227aa4f7242f78a33a3452451eff4 | 0.590506494 | k_Bacteria; p_Actinobacteria; c_Coriobacteriia; o_Coriobacteriales; f_Coriobacteriaceae; g_ ; s_                             |
| X5a6c87d6a4eb5e114959f6192f29b641 | 0.408205055 | k_Bacteria; p_Actinobacteria; c_Actinobacteria; o_Bifidobacteriales; f_Bifidobacteriaceae; g_Bifidobacterium; s_adolescentis |
| X97f07ddfd7af6b5e43d0c5516aced90e | 0.37716155  | k_Bacteria; p_Actinobacteria; c_Coriobacteriia; o_Coriobacteriales; f_Coriobacteriaceae; g_ ; s_                             |

|                                       |                 |                                                                                                                           |
|---------------------------------------|-----------------|---------------------------------------------------------------------------------------------------------------------------|
| ebb8f381bdd9f66ee55229f60ac<br>b97bb  | 0.349325<br>548 | k_Bacteria; p_Firmicutes; c_Clostridia;<br>o_Clostridiales; f_Clostridiaceae                                              |
| X274d44a105684512d6df0a98<br>3a5b6663 | 0.336666<br>809 | k_Bacteria; p_Firmicutes; c_Clostridia;<br>o_Clostridiales; f_Clostridiaceae; g_02d06; s__                                |
| X5654714fd17021f92582b0275<br>6943a86 | 0.336666<br>809 | k_Bacteria; p_Firmicutes; c_Clostridia;<br>o_Clostridiales; f__; g__; s__                                                 |
| X3aa6c8918fd1f91535b598ff78<br>916c4e | 0.336666<br>809 | k_Bacteria; p_Actinobacteria; c_Coriobacteriia;<br>o_Coriobacteriales; f_Coriobacteriaceae; g__; s__                      |
| X9797582f6b7d2be641e0f060e<br>e1d3a20 | 0.336666<br>809 | k_Bacteria; p_Firmicutes; c_Clostridia;<br>o_Clostridiales; f_Veillonellaceae; g_Dialister; s__                           |
| X9d42be9468b9b3db4aeba16fe<br>d70165b | 0.260312<br>855 | k_Bacteria; p_Bacteroidetes; c_Bacteroidia;<br>o_Bacteroidales; f_Prevotellaceae; g__; s__                                |
| X61535a40adb8221483821e39<br>84d0b1ac | 0.260006<br>659 | k_Bacteria; p_Firmicutes; c_Clostridia;<br>o_Clostridiales; f_Lachnospiraceae                                             |
| X9b7e485947ffcf56e03235dc77<br>4335c4 | 0.138373<br>127 | k_Bacteria; p_Firmicutes; c_Clostridia;<br>o_Clostridiales; f_Lachnospiraceae; g__; s__                                   |
| aae4c4ed528ae16ec417df8166<br>99cfdb  | 0.137831<br>68  | k_Bacteria; p_Firmicutes; c_Clostridia;<br>o_Clostridiales; f_Ruminococcaceae; g__; s__                                   |
| X9ec111134b7f857a1d270b470<br>fbf331e | 0.133746<br>49  | k_Bacteria; p_Proteobacteria;<br>c_Epsilonproteobacteria; o_Campylobacteriales;<br>f_Helicobacteraceae; g_Flexispira; s__ |
| ada812eec11bae7b45c860340e<br>b24065  | 0.127817<br>819 | k_Bacteria; p_Actinobacteria; c_Coriobacteriia;<br>o_Coriobacteriales; f_Coriobacteriaceae; g__; s__                      |
| c11b67d8c052cb2b8eaae7e9bf<br>30d1f9  | 0.110049<br>98  | k_Bacteria; p_Firmicutes; c_Clostridia;<br>o_Clostridiales; f__; g__; s__                                                 |
| X6498699e79b7aca5e5bdbdf89<br>ca330d3 | 0.109798<br>873 | k_Bacteria; p_Bacteroidetes; c_Bacteroidia;<br>o_Bacteroidales; f_S24-7; g__; s__                                         |
| c5c739d7f511d6d9c30c24225a<br>e14254  | 0.103870<br>202 | k_Bacteria; p_Firmicutes; c_Clostridia;<br>o_Clostridiales; f_[Mogibacteriaceae]; g__; s__                                |
| d0b538c235318a5baa582e705<br>17058e5  | 0.103870<br>202 | k_Bacteria; p_Actinobacteria; c_Coriobacteriia;<br>o_Coriobacteriales; f_Coriobacteriaceae; g__; s__                      |
| X0df6c802966e8670279671824<br>da4f10a | 0.095485<br>863 | k_Bacteria; p_Firmicutes; c_Bacilli;<br>o_Lactobacillales; f_Lactobacillaceae;<br>g_Lactobacillus; s__                    |
| X61db99aabf206a639dee17ca1<br>30833de | 0.095485<br>863 | k_Bacteria; p_Firmicutes; c_Clostridia;<br>o_Clostridiales; f_Clostridiaceae; g_Clostridium;<br>s_butyricum               |
| X43a9a464782c24cc71180a49e<br>f19830e | 0.086102<br>362 | k_Bacteria; p_Firmicutes; c_Clostridia;<br>o_Clostridiales                                                                |
| X0c8074dbf6ae2ae3b39298e14<br>d306f07 | 0.086102<br>362 | k_Bacteria; p_Actinobacteria; c_Coriobacteriia;<br>o_Coriobacteriales; f_Coriobacteriaceae; g__; s__                      |
| b1d8e09561b600103cc3d8b38<br>8c02478  | 0.086102<br>362 | k_Bacteria; p_Firmicutes; c_Clostridia;<br>o_Clostridiales; f_Lachnospiraceae                                             |
| X43b6707d39d84b5e1d8ece73<br>75bd8390 | 0.086102<br>362 | k_Bacteria; p_Firmicutes; c_Clostridia;<br>o_Clostridiales; f__; g__; s__                                                 |
| d8a42db5c61062f2a7b11fcdf03<br>a65d5  | 0.086102<br>362 | k_Bacteria; p_Firmicutes; c_Clostridia;<br>o_Clostridiales; f_Lachnospiraceae                                             |
| X59b961d6271b069ab40420ec<br>dbe35e0c | 0.074329<br>003 | k_Bacteria; p_Firmicutes; c_Clostridia;<br>o_Clostridiales; f_Ruminococcaceae; g__; s__                                   |
| X950f3856394e951bc01742ec6<br>f39e11c | 0.074329<br>003 | k_Bacteria; p_Firmicutes; c_Clostridia;<br>o_Clostridiales; f_Ruminococcaceae; g__; s__                                   |
| c4098d21f8e840f7a6a8b58698<br>4f6ace  | 0.071538<br>246 | k_Bacteria; p_Bacteroidetes; c_Bacteroidia;<br>o_Bacteroidales; f_Prevotellaceae; g_Prevotella; s__                       |
| b726627e18f29e0da5289f81ca<br>294f92  | 0.071538<br>246 | k_Bacteria; p_Firmicutes; c_Clostridia;<br>o_Clostridiales; f_Ruminococcaceae                                             |
| c48070f3061b086b60ff32f77e0<br>002fa  | 0.071538<br>246 | k_Bacteria; p_Firmicutes; c_Clostridia;<br>o_Clostridiales; f_Ruminococcaceae;<br>g_Faecalibacterium; s_prausnitzii       |



|                                   |             |                                                                                                                        |
|-----------------------------------|-------------|------------------------------------------------------------------------------------------------------------------------|
| X68df6de5da6aefa331747280edcbdbba | 0.070592583 | k_Bacteria; p_Actinobacteria; c_Coriobacteriia; o_Coriobacteriales; f_Coriobacteriaceae; g_Collinsella; s__            |
| X36f8822030b4f2931d27025d7574db4d | 0.070592583 | k_Bacteria; p_Firmicutes; c_Clostridia; o_Clostridiales; f_Ruminococcaceae; g__; s__                                   |
| X33b71b63b791314abbf6af5bb0c68bf0 | 0.052824743 | k_Bacteria; p_Bacteroidetes; c_Bacteroidia; o_Bacteroidales; f_S24-7; g__; s__                                         |
| X3525e8f55cd3355cc02bb9df648623e2 | 0.046896072 | k_Bacteria; p_Firmicutes; c_Clostridia; o_Clostridiales; f_Lachnospiraceae; g_Blautia; s_producta                      |
| a7fe69d61cb22afa7516c62655f3db91  | 0.044733797 | k_Bacteria; p_Tenericutes; c_Mollicutes; o_RF39; f__; g__; s__                                                         |
| X67a27018f69d64ed3d51d08fa76e75aa | 0.042887264 | k_Bacteria; p_Proteobacteria; c_Betaproteobacteria; o_Burkholderiales; f_Alcaligenaceae; g_Sutterella; s__             |
| X2e4f2b53b856c4def6d021d01f5abb70 | 0.038260627 | k_Bacteria; p_Firmicutes; c_Clostridia; o_Clostridiales; f_Lachnospiraceae; g_[Ruminococcus]; s_gnavus                 |
| X6fdb85b72abc94a4a93a9f2bd9294718 | 0.038260627 | k_Bacteria; p_Firmicutes; c_Clostridia; o_Clostridiales; f_Lachnospiraceae; g__; s__                                   |
| X5a729139b46885a340c039ce4294ef6f | 0.036958593 | k_Bacteria; p_Firmicutes; c_Clostridia; o_Clostridiales; f_Ruminococcaceae; g__; s__                                   |
| X2ac3c8f867f239f644664796efde1be1 | 0.032331956 | k_Bacteria; p_Firmicutes; c_Clostridia; o_Clostridiales; f_Christensenellaceae; g__; s__                               |
| e48ce90f2625cce75a6d5d671ca df8ea | 0.032331956 | k_Bacteria; p_Firmicutes; c_Erysipelotrichi; o_Erysipelotrichales; f_Erysipelotrichaceae; g_RFN20; s__                 |
| X796c6e6a817580f165bce51fa5c8fcd6 | 0.032331956 | k_Bacteria; p_Proteobacteria; c_Deltaproteobacteria; o_Desulfovibrionales; f_Desulfovibrionaceae; g_Desulfovibrio; s__ |
| X13b6cb1c2c3697ec16865c2737a4bbb6 | 0.032331956 | k_Bacteria; p_Tenericutes; c_Mollicutes; o_RF39; f__; g__; s__                                                         |
| c8da1c24e8d4e84427e8a994413d7e06  | 0.032331956 | k_Bacteria; p_Proteobacteria; c_Deltaproteobacteria; o_GMD14H09; f__; g__; s__                                         |
| X20a68b281025ba8f8addffca22b306a  | 0.032331956 | k_Bacteria; p_Bacteroidetes; c_Bacteroidia; o_Bacteroidales; f_Prevotellaceae; g_Prevotella; s__                       |
| X43de2d22c3f82423071816f91be76df7 | 0.032331956 | k_Bacteria; p_Firmicutes; c_Clostridia; o_Clostridiales; f_Lachnospiraceae; g_Coprococcus; s__                         |
| X9c1ec2bcd613366802912577c147ec9d | 0.032331956 | k_Bacteria; p_Firmicutes; c_Clostridia; o_Clostridiales; f_Ruminococcaceae; g__; s__                                   |
| X610d01f22168e220c6669dda64cf4031 | 0.032331956 | k_Bacteria; p_Firmicutes; c_Clostridia; o_Clostridiales; f_Clostridiaceae                                              |
| X67e01a89cf3eabe01c14f7f937534cf4 | 0.028375368 | k_Bacteria; p_Firmicutes; c_Clostridia; o_Clostridiales; f_Ruminococcaceae; g__; s__                                   |
| d998dc427dd8fe3ffaf45cda17e95ed0  | 0.024290179 | k_Bacteria; p_Bacteroidetes; c_Bacteroidia; o_Bacteroidales; f_[Paraprevotellaceae]; g__; s__                          |
| X5c4563e3dd7e12dcdf279783af929eaa | 0.021037287 | k_Bacteria; p_Firmicutes; c_Clostridia; o_Clostridiales; f_Lachnospiraceae; g_Roseburia; s_faecis                      |
| X41f9dd2615521de4773610fc548b4ecf | 0.018123205 | k_Bacteria; p_Bacteroidetes; c_Bacteroidia; o_Bacteroidales; f_[Paraprevotellaceae]; g__; s__                          |
| bc29605ee2f490499f5eb3a724b29a91  | 0.014564116 | k_Archaea; p_Euryarchaeota; c_Methanobacteria; o_Methanobacteriales; f_Methanobacteriaceae; g_Methanosphaera; s__      |
| c0091116b0a00327058bc7d9e362647e  | 0.014564116 | k_Bacteria; p_Bacteroidetes; c_Bacteroidia; o_Bacteroidales; f_Prevotellaceae; g__; s__                                |
| f6ad9cc7413123d17e49a62b3ad9c79a  | 0.014564116 | k_Bacteria; p_Bacteroidetes; c_Bacteroidia; o_Bacteroidales; f_Prevotellaceae; g_Prevotella; s__                       |

|                                   |                 |                                                                                                                            |
|-----------------------------------|-----------------|----------------------------------------------------------------------------------------------------------------------------|
| X00a96fbd0ac34bfd245f9c24f8737f7d | 0.014564<br>116 | k_Bacteria; p_Firmicutes; c_Clostridia;<br>o_Clostridiales; f_Lachnospiraceae; g_Blautia;<br>s_obeum                       |
| X2de0f958e30d26f04cba8d2a920bbe46 | 0.014564<br>116 | k_Bacteria; p_Firmicutes; c_Clostridia;<br>o_Clostridiales; f_Lachnospiraceae; g_Blautia; s_                               |
| b621d4b3cca1ec89ceca12efca8a94fb  | 0.014564<br>116 | k_Bacteria; p_Firmicutes; c_Clostridia;<br>o_Clostridiales; f_ ; g_ ; s_                                                   |
| X1d8abf4fd570ea8cb6629871ed3f397a | 0.014564<br>116 | k_Bacteria; p_Actinobacteria; c_Coriobacteriia;<br>o_Coriobacteriales; f_Coriobacteriaceae; g_Slackia;<br>s_               |
| X2e84fcb567e4b042779385f4a4f7ff84 | 0.014352<br>7   | k_Bacteria; p_Verrucomicrobia; c_Verruco-5;<br>o_WCHB1-41; f_RFP12; g_ ; s_                                                |
| X0b4aeb45916a24fd10e3655fe6481966 | 0.013811<br>252 | k_Bacteria; p_Firmicutes; c_Clostridia;<br>o_Clostridiales; f_Christensenellaceae; g_ ; s_                                 |
| d76d59ec71de0e3b22da0c9cd564d41a  | 0.010558<br>36  | k_Bacteria; p_Firmicutes; c_Clostridia;<br>o_Clostridiales; f_Lachnospiraceae                                              |
| X527bbcd459c37296ee8a6362156c2e4e | 0.010558<br>36  | k_Bacteria; p_Firmicutes; c_Clostridia;<br>o_Clostridiales; f_Ruminococcaceae                                              |
| bc979a8588f5a2b031514a23cf3971cb  | 0.010558<br>36  | k_Bacteria; p_Firmicutes; c_Clostridia;<br>o_Clostridiales; f_Ruminococcaceae; g_ ; s_                                     |
| X5c4ec55ee0033be2594e104ef107c52c | 0.006473<br>17  | k_Bacteria; p_Bacteroidetes; c_Bacteroidia;<br>o_Bacteroidales; f_ ; g_ ; s_                                               |
| b7d858871c56b4130c6556ce3f29fd20  | 0.006473<br>17  | k_Bacteria; p_Bacteroidetes; c_Bacteroidia;<br>o_Bacteroidales; f_Prevotellaceae; g_Prevotella;<br>s_copri                 |
| X1dde73d06b595083e0a9b1e6cbb1e9dd | 0.006166<br>974 | k_Bacteria; p_Proteobacteria; c_Epsilonproteobacteria;<br>o_Campylobacterales; f_Helicobacteraceae; g_Flexispira; s_       |
| e506d4d9386a8c9954e2a828ffa44098  | 0.006166<br>974 | k_Bacteria; p_Firmicutes; c_Clostridia;<br>o_Clostridiales; f_Ruminococcaceae; g_ ; s_                                     |
| X90af3675c266d09bb7986147ac5885ec | 0.005916<br>389 | k_Bacteria; p_Firmicutes; c_Clostridia;<br>o_Clostridiales; f_Christensenellaceae; g_ ; s_                                 |
| X4d3f1d8f02b45e845e419a273f5b2386 | 0.004626<br>637 | k_Bacteria; p_Firmicutes; c_Clostridia;<br>o_Clostridiales; f_Ruminococcaceae;<br>g_Ruminococcus; s_                       |
| X44396f15b10f6577d61a11c6047c939f | 0.004626<br>637 | k_Archaea; p_Euryarchaeota; c_Methanobacteria;<br>o_Methanobacteriales; f_Methanobacteriaceae;<br>g_Methanobrevibacter; s_ |
| a47817d5257ecf832986bfd05546dc23  | 0.004626<br>637 | k_Bacteria; p_Lentisphaerae; c_[Lentisphaeria];<br>o_Victivallales; f_Victivallaceae; g_Victivallis;<br>s_vadensis         |
| X2cf3a42dfa118cabf280462b35cdda5  | 0.004626<br>637 | k_Bacteria; p_Firmicutes; c_Erysipelotrichi;<br>o_Erysipelotrichales; f_Erysipelotrichaceae;<br>g_L7A_E11; s_              |
| f663dd604f793f22ce20452b09494608  | 0.004626<br>637 | k_Bacteria; p_Firmicutes; c_Clostridia;<br>o_Clostridiales; f_Ruminococcaceae; g_ ; s_                                     |
| c42c33e86e7b14aa0a09a65aaa bbb9df | 0.004626<br>637 | k_Bacteria; p_Bacteroidetes; c_Bacteroidia;<br>o_Bacteroidales; f_S24-7; g_ ; s_                                           |
| X0c0089fe5e474c353b6e2496d999bfe8 | 0.004626<br>637 | k_Bacteria; p_Firmicutes; c_Clostridia;<br>o_Clostridiales; f_Ruminococcaceae;<br>g_Ruminococcus; s_                       |
| X16530e5b50b780018210dac05a471715 | 0.004085<br>189 | k_Bacteria; p_Firmicutes; c_Clostridia;<br>o_Clostridiales; f_Ruminococcaceae; g_Oscillospira;<br>s_                       |
| b3bd13f0c98ac2d4153dfd73ab56dd2a  | 0.004085<br>189 | k_Bacteria; p_Bacteroidetes; c_Bacteroidia;<br>o_Bacteroidales; f_[Paraprevotellaceae]; g_ ; s_                            |
| b7d0596261d747c1ac8e1c8b3dca415c  | 0.004085<br>189 | k_Bacteria; p_Firmicutes; c_Clostridia;<br>o_Clostridiales; f_ ; g_ ; s_                                                   |

|                                       |                 |                                                                                                                     |
|---------------------------------------|-----------------|---------------------------------------------------------------------------------------------------------------------|
| e40410eaa791ef4386cc63b3d2<br>b3b399  | 0.004085<br>189 | k_Bacteria; p_Firmicutes; c_Erysipelotrichi;<br>o_Erysipelotrichales; f_Erysipelotrichaceae;<br>g_RFN20; s_         |
| X0d53bc80a23106375719154fb<br>b0ab48e | 0.002790<br>758 | k_Bacteria; p_Firmicutes; c_Clostridia;<br>o_Clostridiales; f_Ruminococcaceae;<br>g_Faecalibacterium; s_prausnitzii |
| b38de8a8c802a4845cc9e30cba<br>6615f5  | 0.002790<br>758 | k_Bacteria; p_Firmicutes; c_Clostridia;<br>o_Clostridiales; f_Ruminococcaceae; g_; s_                               |
| e1533fa00a73126001596fdb42<br>776e27  | 0.002790<br>758 | k_Bacteria; p_Firmicutes; c_Clostridia;<br>o_Clostridiales; f_Ruminococcaceae; g_; s_                               |
| X2bb806f05a014ee564ccf0fcae<br>778c80 | 0.002790<br>758 | k_Bacteria; p_Bacteroidetes; c_Bacteroidia;<br>o_Bacteroidales; f_S24-7; g_; s_                                     |

Supplementary Table2. Sheet7. Key taxa in Mountain Gorilla identified based on the network hub score.

| ASV                                   | HubScore       | Taxa                                                                                                                       |
|---------------------------------------|----------------|----------------------------------------------------------------------------------------------------------------------------|
| X4b487f6998644c9a<br>b8261cb84388db22 | 1              | k_Fungi;p_unidentified;c_unidentified;o_unidentified;f_unid<br>entified;g_unidentified;s_unidentified                      |
| cd2dfd32022679063<br>a3b38238b54fac2  | 0.9375645<br>1 | k_Fungi;p_Basidiomycota;c_Agaricomycetes;o_Polyporales;f_<br>_Ganodermataceae;g_Ganoderma                                  |
| X0446575d89fb3c52<br>8f4c6695488dc860 | 0.8897824<br>8 | k_Fungi;p_unidentified;c_unidentified;o_unidentified;f_unid<br>entified;g_unidentified;s_unidentified                      |
| d0cc6c33b9a2c6f77<br>552aeb0bcd46181  | 0.5531745<br>3 | k_Fungi;p_unidentified;c_unidentified;o_unidentified;f_unid<br>entified;g_unidentified;s_unidentified                      |
| ede5c6111ea13ccf36<br>5bd218ab4ba3a7  | 0.5397200<br>4 | k_Fungi                                                                                                                    |
| X3d11b973c1db04a<br>364bcbaf281b86a2c | 0.4707030<br>4 | k_Fungi;p_unidentified;c_unidentified;o_unidentified;f_unid<br>entified;g_unidentified;s_unidentified                      |
| X82c161da92b677d<br>86da5706f3964019c | 0.3908718<br>2 | k_Fungi                                                                                                                    |
| c4ea277d6b5537b73<br>19797af3d804a33  | 0.3471312<br>1 | k_Fungi                                                                                                                    |
| X9244f68348642fc5f<br>cde1f080e2c2cb0 | 0.2948453      | k_Fungi;p_unidentified;c_unidentified;o_unidentified;f_unid<br>entified;g_unidentified;s_unidentified                      |
| X5e52c227876eaf11<br>960205333760c501 | 0.2929382<br>7 | k_Fungi;p_Ascomycota;c_Dothideomycetes;o_Pleosporales;f_<br>_Didymellaceae                                                 |
| X99fc3b75ffa5aab60<br>a928ded1a0bd77b | 0.2825761<br>9 | k_Fungi;p_Ascomycota;c_Sordariomycetes;o_Xylariales;f_Xyl<br>ariaceae;g_Xylaria;s_Xylaria_hypoxyton                        |
| X6863a73b09aedd9<br>95b88bf0cd879978d | 0.2611760<br>2 | k_Bacteria; p_Actinobacteria; c_Coriobacteriia;<br>o_Coriobacteriales; f_Coriobacteriaceae; g_; s_                         |
| X0758ff38c519b633<br>7645bb62461c9511 | 0.2435910<br>2 | k_Bacteria; p_Firmicutes; c_Clostridia; o_Clostridiales;<br>f_Ruminococcaceae; g_; s_                                      |
| X44396f15b10f6577<br>d61a11c6047c939f | 0.2434554<br>2 | k_Archaea; p_Euryarchaeota; c_Methanobacteria;<br>o_Methanobacteriales; f_Methanobacteriaceae;<br>g_Methanobrevibacter; s_ |
| X79ba9fd704fc7264<br>b695cc0504c337a9 | 0.2404268<br>6 | k_Bacteria; p_Firmicutes; c_Clostridia; o_Clostridiales                                                                    |
| c5673c320e2c60580<br>f945fd93295033a  | 0.2142529<br>4 | Unassigned                                                                                                                 |
| X9d4fe70552215a41<br>1cfb0a4497a4b985 | 0.2048557<br>8 | k_Bacteria; p_Actinobacteria; c_Coriobacteriia;<br>o_Coriobacteriales; f_Coriobacteriaceae; g_; s_                         |
| e70aac52b4b9557c3<br>54927fe02c01de3  | 0.2008793<br>6 | k_Bacteria; p_Chloroflexi; c_Anaerolineae; o_Anaerolineales;<br>f_Anaerolinaceae; g_SHD-231; s_                            |
| cadace978f08cbdfdf<br>018a73f46e50b8  | 0.1989378<br>8 | k_Bacteria; p_Actinobacteria; c_Coriobacteriia;<br>o_Coriobacteriales; f_Coriobacteriaceae; g_Adlercreutzia; s_            |
| ddb4a8335c1975a5<br>83b6a789278a7f4f  | 0.197409       | k_Bacteria; p_Firmicutes; c_Clostridia; o_Clostridiales                                                                    |
| X7c1133becb9a9448<br>3cd039df023a81e6 | 0.1878329<br>7 | k_Fungi                                                                                                                    |
| b4ff137b6fbd7dd58<br>1a5fe40958fb08e  | 0.1873446<br>3 | k_Fungi                                                                                                                    |
| X5c60ae000f7160d4<br>d7edfe6a1498e009 | 0.1869631<br>4 | k_Fungi;p_unidentified;c_unidentified;o_unidentified;f_unid<br>entified;g_unidentified;s_unidentified                      |
| f6d07d1918010fa58f<br>6f5473555fb2f7  | 0.1782863<br>6 | k_Bacteria; p_Firmicutes; c_Clostridia; o_Clostridiales;<br>f_Lachnospiraceae                                              |
| X840f1ab652ea9d17<br>5444d94d511cbb89 | 0.1741760<br>2 | k_Bacteria; p_Bacteroidetes; c_Bacteroidia; o_Bacteroidales                                                                |
| X31815356c56406ec<br>f0078be269d31906 | 0.1642234<br>5 | k_Bacteria; p_Bacteroidetes; c_Bacteroidia; o_Bacteroidales;<br>f_Prevotellaceae; g_; s_                                   |

|                                    |            |                                                                                                                           |
|------------------------------------|------------|---------------------------------------------------------------------------------------------------------------------------|
| c2a2267cf10496a25b7d0761f5dff17c   | 0.15917431 | k_Bacteria; p_Firmicutes; c_Clostridia; o_Clostridiales; f_Ruminococcaceae; g_Ruminococcus                                |
| abef6dd0c5aa07bd468f04d4bfea2a8c   | 0.15582571 | k_Bacteria; p_Firmicutes; c_Clostridia; o_Clostridiales; f_Lachnospiraceae; g_; s__                                       |
| X2690b25aaeca8be19ac7b1d6dc1d85c8  | 0.15312791 | k_Bacteria; p_Spirochaetes; c_Spirochaetes; o_Spirochaetales; f_Spirochaetaceae; g_Treponema; s__                         |
| ba69b8ab8a667d87dc5e1f4ac1fe9f9a   | 0.15282727 | k_Bacteria; p_Firmicutes; c_Clostridia; o_Clostridiales; f_[Mogibacteriaceae]; g_; s__                                    |
| e12f9d4e13e6e2f2d15aee4713f1be1b   | 0.14485126 | k_Bacteria; p_Verrucomicrobia; c_Verruco-5; o_WCHB1-41; f_RFP12; g_; s__                                                  |
| X0fe43da51e29bb42c4839f827b42d6b6  | 0.14320672 | k_Bacteria; p_Spirochaetes; c_Spirochaetes; o_Sphaerochaetales; f_Sphaerochaetaceae; g_Sphaerochaeta; s__                 |
| b2c87bc6d57953af4bfd1b4647e8ef8b   | 0.14085905 | k_Bacteria; p_Actinobacteria; c_Coriobacteriia; o_Coriobacteriales; f_Coriobacteriaceae; g_Adlercreutzia; s__             |
| ff76b6c4fd74017cec052e8a84fb2d3a   | 0.14060861 | k_Bacteria; p_Firmicutes; c_Clostridia; o_Clostridiales; f_Lachnospiraceae; g_; s__                                       |
| db7f42d2a4ded289e177bb4c00edff61   | 0.13866383 | k_Bacteria; p_Firmicutes; c_Clostridia; o_Clostridiales; f_Lachnospiraceae; g_; s__                                       |
| X543eb306ab15d1b00b591205bb5b62a5  | 0.13762236 | k_Fungi; p_Ascomycota; c_Sordariomycetes; o_Xylariales; f_Sporocadaceae; g_Neopestalotiopsis; s_Neopestalotiopsis_foedans |
| bc979a8588f5a2b031514a23cf3971cb   | 0.13725996 | k_Bacteria; p_Firmicutes; c_Clostridia; o_Clostridiales; f_Ruminococcaceae; g_; s__                                       |
| bd9a9034e5e3bdb341ee33a909d4ee09   | 0.13725996 | k_Bacteria; p_Firmicutes; c_Clostridia; o_Clostridiales; f_Lachnospiraceae; g_; s__                                       |
| d2ae019a0fa9e489e d9cfc2ae0629c8f  | 0.13725996 | k_Bacteria; p_Verrucomicrobia; c_Verruco-5; o_WCHB1-41; f_RFP12; g_; s__                                                  |
| e0652aed13d278f0e66e62e50360c4ab   | 0.13725996 | k_Bacteria; p_Firmicutes; c_Clostridia; o_Clostridiales; f_Lachnospiraceae; g_Pseudobutyrvibrio; s__                      |
| X240776793aa237ffe655f53b4a7a690   | 0.13725996 | k_Bacteria; p_Firmicutes; c_Clostridia; o_Clostridiales; f_Lachnospiraceae; g_Clostridium; s_lavalense                    |
| fa15385fd4e428c61d7459be496fd83b   | 0.13671366 | k_Bacteria; p_TM7; c_TM7-3; o_CW040; f_F16; g_; s__                                                                       |
| X467669415f8967ee fc7943baa29b244b | 0.13671366 | k_Bacteria; p_Tenericutes; c_Mollicutes; o_Mycoplasmatales; f_Mycoplasmataceae; g_; s__                                   |
| d8f45fe6e9250729a e9b8b534db7c1a8  | 0.12841075 | k_Archaea; p_Euryarchaeota; c_Thermoplasmata; o_E2; f_[Methanomassiliococcaceae]; g_; s__                                 |
| a118d212b798d130e0eca5026fa3a1e9   | 0.11959011 | k_Bacteria; p_Proteobacteria; c_Deltaproteobacteria; o_Desulfovibrionales; f_Desulfovibrionaceae; g_Desulfovibrio; s_D168 |
| X7f20483cee471b11108b1dbed82cb33f  | 0.11830389 | k_Bacteria; p_Firmicutes; c_Clostridia; o_Clostridiales; f_Lachnospiraceae; g_Blautia; s__                                |
| X9c7bb6afb72b7c69c5872c14e860d8a7  | 0.11608024 | k_Bacteria; p_Firmicutes; c_Clostridia; o_Clostridiales; f_Lachnospiraceae; g_; s__                                       |
| X1c06f26cc258f7b8a75e67c1de7ea6b8  | 0.11479931 | Unassigned                                                                                                                |
| X29cb1bde52f4a1799048265bda201748  | 0.11479931 | k_Bacteria; p_Firmicutes; c_Clostridia; o_Clostridiales; f_Lachnospiraceae                                                |
| X73f98259afce62b1d1a12ba85685080d  | 0.10763891 | k_Fungi; p_unidentified; c_unidentified; o_unidentified; f_unidentified; g_unidentified; s_unidentified                   |
| X42140b89d9315b542313bc212474ed44  | 0.10565332 | k_Bacteria; p_Actinobacteria; c_Coriobacteriia; o_Coriobacteriales; f_Coriobacteriaceae; g_; s__                          |
| e2ae3dca607ac3d0c41521221aa6d4b3   | 0.10113195 | k_Bacteria; p_Firmicutes; c_Erysipelotrichi; o_Erysipelotrichales; f_Erysipelotrichaceae; g_; s__                         |
| X1599dc1cc5a6f06363fcbb4ac4251e77  | 0.09919185 | k_Bacteria; p_Firmicutes; c_Clostridia; o_Clostridiales; f_Ruminococcaceae; g_; s__                                       |

|                                   |            |                                                                                                                  |
|-----------------------------------|------------|------------------------------------------------------------------------------------------------------------------|
| X794cc1c6386320420a2c2ea76eedaaf8 | 0.09454194 | k_Bacteria; p_Firmicutes; c_Clostridia; o_Clostridiales; f_Ruminococcaceae; g_; s_                               |
| X26e7ed2b3c2fca3c58b85d81d4e31c33 | 0.08855605 | k_Fungi;p_unidentified;c_unidentified;o_unidentified;f_unidentified;g_unidentified;s_unidentified                |
| X2a11904576933ec08ff762ebabeb767e | 0.08247264 | k_Fungi;p_unidentified;c_unidentified;o_unidentified;f_unidentified;g_unidentified;s_unidentified                |
| e3cdda80619a877c71570fe8812129f9  | 0.07995223 | k_Bacteria; p_Firmicutes; c_Clostridia; o_Clostridiales; f_[Mogibacteriaceae]; g_; s_                            |
| X6376ea6dab7d0fde3cd66f53b57e1484 | 0.07919217 | k_Bacteria; p_Proteobacteria; c_Gammaproteobacteria; o_Pseudomonadales; f_Pseudomonadaceae; g_Pseudomonas; s_    |
| X3c4b2dbf7e88a26dcbe537a0f067596f | 0.07558588 | k_Bacteria; p_Firmicutes; c_Clostridia; o_Clostridiales; f_Lachnospiraceae                                       |
| b7ba47698ed504b740e9348aa950a544  | 0.07419612 | k_Bacteria; p_Firmicutes; c_Clostridia; o_Clostridiales; f_Ruminococcaceae; g_; s_                               |
| da591c5d4bb1ce9587ac15167a0b87a0  | 0.07419612 | k_Bacteria; p_Firmicutes; c_Clostridia; o_Clostridiales; f_Ruminococcaceae; g_Faecalibacterium; s_prausnitzii    |
| X619d1441d6d638828685513300f6d641 | 0.05804236 | k_Bacteria; p_Firmicutes; c_Clostridia; o_Clostridiales; f_Ruminococcaceae; g_; s_                               |
| a81f6cb76f072e5c9bb669ceeb52390b  | 0.0579044  | k_Fungi;p_Basidiomycota;c_Agaricomycetes;o_Agaricales;f_Psathyrellaceae;g_Coprinellus;s_Coprinellus_disseminatus |
| a863aafd8bc588060b8c70de3227294e  | 0.0561017  | k_Bacteria; p_Firmicutes; c_Clostridia; o_Clostridiales; f_Ruminococcaceae; g_; s_                               |
| e6c95d620576f6503d607275d777bef1  | 0.05022264 | k_Archaea; p_Euryarchaeota; c_Thermoplasmata; o_E2; f_[Methanomassiliococcaceae]; g_; s_                         |
| a964478144e83d41e8216b4cab2aea10  | 0.04809967 | k_Bacteria; p_Proteobacteria; c_Betaproteobacteria                                                               |
| a3e92cdf515f0a04cdeb21c6bf06cdece | 0.04539179 | k_Archaea; p_Euryarchaeota; c_Methanobacteria; o_Methanobacteriales; f_Methanobacteriaceae; g_Methanosphaera; s_ |
| X785d65c6f2f55ace657add335783f516 | 0.0410264  | k_Bacteria; p_Firmicutes; c_Clostridia; o_Clostridiales; f_[Mogibacteriaceae]; g_; s_                            |
| d205c635885fb65b4021537622356e3c  | 0.04094352 | k_Fungi                                                                                                          |
| aac76587f2b3cba87cf266dcb41e3641  | 0.03806811 | k_Bacteria; p_Firmicutes; c_Erysipelotrichi; o_Erysipelotrichales; f_Erysipelotrichaceae; g_Bulleidia            |
| X18bb09f33338fb287bf1cfe4acd5ca43 | 0.037785   | k_Bacteria; p_Actinobacteria; c_Coriobacteriia; o_Coriobacteriales; f_Coriobacteriaceae; g_; s_                  |
| ac8e57fd9b2d097165cbd93c4ab83ecd  | 0.03612801 | k_Bacteria; p_Firmicutes; c_Clostridia; o_Clostridiales; f_Ruminococcaceae; g_Gemmiger; s_formicilis             |
| ff0c895a80b4184dea0356c214971e3a  | 0.03612801 | k_Bacteria; p_Tenericutes; c_Mollicutes; o_RF39; f_; g_; s_                                                      |
| X0266597168ff0f8a0af449abe4599b0c | 0.03612801 | k_Bacteria; p_Verrucomicrobia; c_Verruco-5; o_WCHB1-41; f_RFP12; g_; s_                                          |
| X1e735e32a159cd305a3ab49b65182812 | 0.03612801 | k_Bacteria; p_Firmicutes; c_Clostridia; o_Clostridiales; f_Ruminococcaceae; g_; s_                               |
| X7baae0d5fced0473d9b27d518c762646 | 0.03457549 | k_Fungi;p_unidentified;c_unidentified;o_unidentified;f_unidentified;g_unidentified;s_unidentified                |
| d8fbb1502286d84016871435218dabfb  | 0.0320151  | k_Fungi;p_unidentified;c_unidentified;o_unidentified;f_unidentified;g_unidentified;s_unidentified                |
| b60ea01d9efc02c2ebd084f37e679603  | 0.03154753 | k_Fungi;p_Basidiomycota;c_Malasseziomycetes;o_Malasseziales;f_Malasseziaceae;g_Malassezia;s_Malassezia_restricta |
| X1b672a28fff72c4817820c82c8a63219 | 0.03058554 | k_Bacteria; p_Firmicutes; c_Clostridia; o_Clostridiales; f_; g_; s_                                              |
| e0cdef7457817f32e98b7ff57e7b5d26  | 0.02556813 | k_Bacteria; p_Bacteroidetes; c_Bacteroidia; o_Bacteroidales                                                      |

|                                   |            |                                                                                                                           |
|-----------------------------------|------------|---------------------------------------------------------------------------------------------------------------------------|
| X1d17970ef050ad232d4bdb526d5199c6 | 0.02460416 | k_Fungi;p_unidentified;c_unidentified;o_unidentified;f_unidentified;g_unidentified;s_unidentified                         |
| X2d700ed4c9f0b7db34a6604af085741a | 0.02447644 | k_Bacteria; p_Bacteroidetes; c_Bacteroidia; o_Bacteroidales; f_[Paraprevotellaceae]; g_[Prevotella]; s__                  |
| f4687285ab01e29bf37cde777678687f  | 0.02246065 | k_Bacteria; p_Bacteroidetes; c_Bacteroidia; o_Bacteroidales; f_; g_; s__                                                  |
| f6be8fd3434273e20c0b5a1461ee3c85  | 0.02246065 | k_Bacteria; p_Firmicutes; c_Clostridia; o_Clostridiales; f_; g_; s__                                                      |
| X0eba36394b3b0935266fc09e7c3d6eb5 | 0.02246065 | k_Bacteria; p_Spirochaetes; c_Spirochaetes; o_Spirochaetales; f_Spirochaetaceae; g_Treponema; s__                         |
| X7327a55af477aa89dc73611f2806c3e9 | 0.02246065 | k_Bacteria; p_Firmicutes; c_Clostridia; o_Clostridiales; f_Ruminococcaceae; g_; s__                                       |
| X8db0cc8463bf7cddca37e038edcb1bc  | 0.02246065 | k_Bacteria; p_Lentisphaerae; c_[Lentisphaeria]; o_Z20; f_R4-45B; g_; s__                                                  |
| X2d2b904b13603efa7a0bfd708302a676 | 0.02191436 | k_Bacteria; p_Firmicutes; c_Clostridia; o_Clostridiales                                                                   |
| fd9604431c04c520809e157ab0a26a8f  | 0.01959828 | k_Bacteria; p_Actinobacteria; c_Coriobacteriia; o_Coriobacteriales; f_Coriobacteriaceae; g_; s__                          |
| X2553ed5072c6f97741e17feaad9aec4  | 0.01727452 | k_Bacteria; p_Bacteroidetes; c_Bacteroidia; o_Bacteroidales; f_; g_; s__                                                  |
| X7399d67fa79f8849916f3f34caa5f63f | 0.01587064 | k_Bacteria; p_Tenericutes; c_Mollicutes; o_RF39; f_; g_; s__                                                              |
| X70ecf3f1d0cee3c5c8e704e99eef8e3e | 0.01523341 | k_Bacteria; p_Bacteroidetes; c_Bacteroidia; o_Bacteroidales                                                               |
| X003d2f871db236415b4a4bcc8b0c829f | 0.01282823 | k_Fungi;p_unidentified;c_unidentified;o_unidentified;f_unidentified;g_unidentified;s_unidentified                         |
| X7a313870bb97fff943b4b91400a6b835 | 0.01197166 | k_Bacteria; p_Firmicutes; c_Erysipelotrichi; o_Erysipelotrichales; f_Erysipelotrichaceae; g_p-75-a5; s__                  |
| X2abb85ea251f01e94623408e600f934b | 0.01147349 | k_Bacteria; p_Proteobacteria; c_Deltaproteobacteria; o_Desulfovibrionales; f_Desulfovibrionaceae; g_Desulfovibrio; s_D168 |
| X68b655ce0b3de7da0db0b3b6869b440d | 0.00928906 | k_Bacteria; p_Actinobacteria; c_Coriobacteriia; o_Coriobacteriales; f_Coriobacteriaceae; g_; s__                          |
| add9d4387a6350194317b01fafa5a680  | 0.00762662 | k_Bacteria; p_Bacteroidetes; c_Bacteroidia; o_Bacteroidales; f_Porphyrimonadaceae; g_Parabacteroides; s__                 |
| X233039daf52bf206a2558eede3c5fad6 | 0.00762662 | k_Bacteria; p_Actinobacteria; c_Coriobacteriia; o_Coriobacteriales; f_Coriobacteriaceae; g_; s__                          |
| X847b2eb6121654af9059db00367fa4f9 | 0.00762662 | k_Bacteria; p_Actinobacteria; c_Coriobacteriia; o_Coriobacteriales; f_Coriobacteriaceae; g_; s__                          |
| d0b716a1b345a39ec1fb098778fb4fab  | 0.00760679 | k_Bacteria; p_Firmicutes; c_Clostridia; o_Clostridiales; f_[Mogibacteriaceae]; g_; s__                                    |
| X24a2d03bd66addf61ae0d8b3dbb1145c | 0.00760679 | k_Bacteria; p_Firmicutes; c_Clostridia; o_Clostridiales; f_Lachnospiraceae; g_; s__                                       |
| X31c0203284637c9382d689abc06a0d85 | 0.00760679 | k_Bacteria; p_Firmicutes; c_Clostridia; o_Clostridiales; f_Ruminococcaceae; g_; s__                                       |
| X3903585322b1fabd7ee0672e2dcf8701 | 0.0075913  | k_Bacteria; p_Proteobacteria; c_Betaproteobacteria; o_Burkholderiales; f_Alcaligenaceae; g_Sutterella; s__                |
| b5d9a9960cd0513b1c89e084b335c3d2  | 0.00359566 | k_Bacteria; p_Firmicutes; c_Clostridia; o_Clostridiales; f_; g_; s__                                                      |
| cc7b0c4fe7613151aee46e9be3ea14a9  | 0.00359566 | k_Bacteria; p_Firmicutes; c_Clostridia; o_Clostridiales; f_Ruminococcaceae; g_Oscillospira; s__                           |
| X026badcb181adb78fecbe14919ea4f12 | 0.00359566 | k_Bacteria; p_Bacteroidetes; c_Bacteroidia; o_Bacteroidales; f_; g_; s__                                                  |
| X252ae349c56c501852b3cd61097190ed | 0.0023511  | k_Bacteria; p_Firmicutes; c_Clostridia; o_Clostridiales; f_Christensenellaceae; g_; s__                                   |
| X2393b358b70b807e64b122d71982aaf3 | 0.00167352 | k_Bacteria; p_Actinobacteria; c_Coriobacteriia; o_Coriobacteriales; f_Coriobacteriaceae; g_Collinsella; s__               |

|                                   |            |                                                                                                   |
|-----------------------------------|------------|---------------------------------------------------------------------------------------------------|
| X6a2b2a6def4ca2de81aa7719db83eeca | 0.00140388 | k_Bacteria; p_Firmicutes; c_Clostridia; o_Clostridiales; f_Lachnospiraceae; g_; s_                |
| X8e73663f2154a81f8b7a40000f2d4b4c | 0.00140388 | k_Bacteria; p_Firmicutes; c_Clostridia; o_Clostridiales; f_Ruminococcaceae; g_Oscillospira; s_    |
| X5f78d2e842250d6c48ff921006d0f9d7 | 0.00052087 | k_Bacteria; p_Actinobacteria; c_Coriobacteriia; o_Coriobacteriales; f_Coriobacteriaceae; g_; s_   |
| X241dab63b8c1f6ab83ead7a5142499bd | 0.00027289 | k_Fungi;p_unidentified;c_unidentified;o_unidentified;f_unidentified;g_unidentified;s_unidentified |
| b6e2c9c93b4dd7babcbf52038fa34b78  | 1.11E-05   | k_Bacteria; p_Firmicutes; c_Clostridia; o_Clostridiales; f_; g_; s_                               |
| X5ad2e2d434beabfedd0ec753ad1a329b | 1.11E-05   | k_Bacteria; p_Fusobacteria; c_Fusobacteriia; o_Fusobacteriales; f_Fusobacteriaceae; g_; s_        |



Supplementary Table2. Sheet8. Key taxa in Western Lowland Gorilla identified based on the network hub score.

| ASV                               | HubScore   | Taxa                                                                                                         |
|-----------------------------------|------------|--------------------------------------------------------------------------------------------------------------|
| X35ffcc3b809d667286737d79670b8de5 | 1          | k_Bacteria; p_Actinobacteria; c_Actinobacteria; o_Bifidobacteriales; f_Bifidobacteriaceae; g_Bifidobacterium |
| ff175bf248f825575b442007206b0a2c  | 0.84854616 | k_Bacteria; p_Bacteroidetes; c_Bacteroidia; o_Bacteroidales; f_g_; s_g_                                      |
| a2d620b95b186edf72c0e73c452a30ae  | 0.78425976 | k_Bacteria; p_Bacteroidetes; c_Bacteroidia; o_Bacteroidales; f_Prevotellaceae; g_Prevotella; s_g_            |
| X3e1088a9b0a946fd0ce8e3621fb33e85 | 0.45506115 | k_Bacteria; p_Firmicutes; c_Clostridia; o_Clostridiales                                                      |
| X0229a3ed44e215720e8926eb3b372933 | 0.45506115 | k_Bacteria; p_Firmicutes; c_Erysipelotrichi; o_Erysipelotrichales; f_Erysipelotrichaceae; g_p-75-a5; s_g_    |
| f65fe04b0921a77bacea7992c72b38d8  | 0.45506115 | k_Bacteria; p_Firmicutes; c_Clostridia; o_Clostridiales; f_Christensenellaceae; g_g_; s_g_                   |
| ed13fbb347defb92256f9d5f8bcc5add  | 0.45506115 | k_Bacteria; p_Firmicutes; c_Clostridia; o_Clostridiales; f_Ruminococcaceae; g_g_; s_g_                       |
| X8db0cc8463bf7cdcdca37e038edcb1bc | 0.45506115 | k_Bacteria; p_Lentisphaerae; c_[Lentisphaeria]; o_Z20; f_R4-45B; g_g_; s_g_                                  |
| c89de32164d066b9cee9de971d8db6e1  | 0.45506115 | k_Bacteria; p_Tenericutes; c_Mollicutes; o_Anaeroplasmatales; f_Anaeroplasmataceae; g_g_; s_g_               |
| X2a6665c89f80025ad1305e78f0bfdcb0 | 0.45506115 | k_Bacteria; p_Firmicutes; c_Clostridia; o_Clostridiales; f_Lachnospiraceae                                   |
| f5f247005f1314b5108bb61d4423cf2c  | 0.45506115 | k_Bacteria; p_Firmicutes; c_Erysipelotrichi; o_Erysipelotrichales; f_Erysipelotrichaceae; g_RFN20; s_g_      |
| adceb3dfb4863c4707a8a6d14db02cfe  | 0.45506115 | k_Bacteria; p_Firmicutes; c_Clostridia; o_Clostridiales; f_Ruminococcaceae; g_g_; s_g_                       |
| X4335c4f074c4ce7600acb94b939057ec | 0.44955339 | k_Bacteria; p_Planctomycetes; c_Planctomycetia; o_Pirellulales; f_Pirellulaceae; g_g_; s_g_                  |
| X7e025abc1239c5550e3fe9610ff28d91 | 0.32919862 | k_Bacteria; p_Tenericutes; c_Mollicutes; o_RF39; f_g_; s_g_                                                  |
| X21586a45e85ce6bf1687fa668302365f | 0.32919862 | k_Bacteria; p_Firmicutes; c_Clostridia; o_Clostridiales; f_g_; s_g_                                          |
| X95636cde183c77c2a0109d48f419d158 | 0.32919862 | k_Bacteria; p_Firmicutes; c_Clostridia; o_Clostridiales; f_g_; s_g_                                          |
| c47f43acb387a2fb571c452bc0c4be0e  | 0.32919862 | k_Bacteria; p_Tenericutes; c_Mollicutes; o_RF39; f_g_; s_g_                                                  |
| X2f6df61bac26d572d82137d547fdc7cf | 0.32919862 | k_Bacteria; p_Tenericutes; c_Mollicutes; o_RF39; f_g_; s_g_                                                  |
| X7bc9a2e59b65fa37d751cee5f94c4a4f | 0.32919862 | k_Bacteria; p_Firmicutes; c_Clostridia; o_Clostridiales; f_[Mogibacteriaceae]; g_Mogibacterium; s_g_         |
| f4687285ab01e29bf37cde777678687f  | 0.32919862 | k_Bacteria; p_Bacteroidetes; c_Bacteroidia; o_Bacteroidales; f_g_; s_g_                                      |

|                                   |            |                                                                                                                        |
|-----------------------------------|------------|------------------------------------------------------------------------------------------------------------------------|
| X48b421cf8b56e91becab03cbd246474e | 0.32919862 | k_Bacteria; p_Bacteroidetes; c_Bacteroidia; o_Bacteroidales; f_[Paraprevotellaceae]; g_; s_                            |
| d478910a683aff84bec4fb1213969719  | 0.24055677 | k_Bacteria; p_Actinobacteria; c_Coriobacteriia; o_Coriobacteriales; f_Coriobacteriaceae; g_; s_                        |
| X7566bcaf1d779beeb23d386e833dab2a | 0.23778692 | k_Bacteria; p_Lentisphaerae; c_[Lentisphaeria]; o_Z20; f_R4-45B; g_; s_                                                |
| a16930bcf789ac4fb2033e1bae65d393  | 0.21574024 | k_Bacteria; p_Bacteroidetes; c_Bacteroidia; o_Bacteroidales; f_; g_; s_                                                |
| X7023ef6e491364c659ce1f086354252c | 0.21574024 | k_Bacteria; p_Actinobacteria; c_Coriobacteriia; o_Coriobacteriales; f_Coriobacteriaceae; g_Collinsella; s_             |
| a658a3950ddcd55b546e751550b6807e  | 0.21574024 | k_Bacteria; p_Firmicutes; c_Erysipelotrichi; o_Erysipelotrichales; f_Erysipelotrichaceae; g_RFN20; s_                  |
| eaaf08a1870579ac02700c7bf82169cc  | 0.21574024 | k_Bacteria; p_Firmicutes; c_Erysipelotrichi; o_Erysipelotrichales; f_Erysipelotrichaceae; g_p-75-a5; s_                |
| X0ebcd9137c7542614095dfcd01905c96 | 0.12035477 | k_Bacteria; p_Tenericutes; c_Mollicutes; o_RF39; f_; g_; s_                                                            |
| X847dd19dd00c43810f3051cf594a1a77 | 0.12035477 | k_Bacteria                                                                                                             |
| X3b951c1f21c92bc555de6b5c536eca3d | 0.12035477 | k_Bacteria; p_Firmicutes; c_Clostridia; o_Clostridiales; f_Ruminococcaceae; g_; s_                                     |
| X33518e48b174ac428cb7be1a216c6c6e | 0.12035477 | k_Bacteria; p_Firmicutes; c_Clostridia; o_Clostridiales; f_Lachnospiraceae; g_Coproccoccus; s_                         |
| bc979a8588f5a2b031514a23cf3971cb  | 0.02710471 | k_Bacteria; p_Firmicutes; c_Clostridia; o_Clostridiales; f_Ruminococcaceae; g_; s_                                     |
| e10c65b6d7afe6d6fab60b7c887d0262  | 0.02481654 | k_Bacteria; p_Firmicutes; c_Clostridia; o_Clostridiales; f_Lachnospiraceae                                             |
| X4174bf2de3b9e936974bf73289a8ae6c | 0.02481654 | k_Bacteria; p_Firmicutes; c_Clostridia; o_Clostridiales; f_Ruminococcaceae; g_; s_                                     |
| X24a2d03bd66addf61ae0d8b3dbb1145c | 0.02481654 | k_Bacteria; p_Firmicutes; c_Clostridia; o_Clostridiales; f_Lachnospiraceae; g_; s_                                     |
| c2a2d50669235f126fad4298df409c2c  | 0.02481654 | k_Bacteria; p_Verrucomicrobia; c_Verruco-5; o_WCHB1-41; f_RFP12; g_; s_                                                |
| X0eba36394b3b0935266fc09e7c3d6eb5 | 0.02204668 | k_Bacteria; p_Spirochaetes; c_Spirochaetes; o_Spirochaetales; f_Spirochaetaceae; g_Treponema; s_                       |
| X17547c2f776585d1d76fb464c0b00c23 | 0.02204668 | k_Bacteria; p_Proteobacteria; c_Epsilonproteobacteria; o_Campylobacteriales; f_Campylobacteraceae; g_Campylobacter; s_ |
| b2fb23a39d2283b55519332766d4c4ab  | 0.02204668 | k_Bacteria; p_Verrucomicrobia; c_Verruco-5; o_WCHB1-41; f_RFP12; g_; s_                                                |
| X4567ac24f23a8e96e9cbfdb56f7057c7 | 0.02204668 | k_Bacteria; p_Bacteroidetes; c_Bacteroidia; o_Bacteroidales; f_; g_; s_                                                |
| c04c87ff72eb8ad4ec07894d5b0cf2a7  | 0.00443917 | Unassigned                                                                                                             |

|                                   |            |                                                                                                               |
|-----------------------------------|------------|---------------------------------------------------------------------------------------------------------------|
| X9370b6f66c750d3d42bbe22650b40a99 | 0.00228818 | k_Bacteria; p_Firmicutes; c_Clostridia; o_Clostridiales; f_Ruminococcaceae                                    |
| c1fa4eff2c73bc54ab6fc45c1e0f8caf  | 0.00183804 | k_Bacteria; p_Tenericutes; c_Mollicutes; o_Anaeroplasmatales; f_Anaeroplasmataceae; g_; s__                   |
| b0ceeb1a9580e139ac1c42cf23f502ec  | 0.00108305 | k_Bacteria; p_Firmicutes; c_Clostridia; o_Clostridiales; f_Lachnospiraceae; g_; s__                           |
| X71efbec757ca125dcb0e754137d9cc75 | 0.00075917 | k_Bacteria; p_Bacteroidetes; c_Bacteroidia; o_Bacteroidales; f_; g_; s__                                      |
| b38de8a8c802a4845cc9e30cba6615f5  | 0.00063463 | k_Bacteria; p_Firmicutes; c_Clostridia; o_Clostridiales; f_Ruminococcaceae; g_; s__                           |
| X8387c8957cd0ec7b5f2b8e4cf1ebd0d0 | 0.00053391 | k_Bacteria; p_Firmicutes; c_Clostridia; o_Clostridiales; f_Peptococcaceae; g_Peptococcus; s__                 |
| X8e8a0a64f033aae0b0302c80fd35b82a | 0.00028752 | k_Bacteria; p_Firmicutes; c_Clostridia; o_Clostridiales; f_; g_; s__                                          |
| X252ae349c56c501852b3cd61097190ed | 7.86E-05   | k_Bacteria; p_Firmicutes; c_Clostridia; o_Clostridiales; f_Christensenellaceae; g_; s__                       |
| c6c3ab4e828fb40d6e05967b7aac9338  | 7.29E-05   | k_Bacteria; p_Firmicutes; c_Clostridia; o_Clostridiales; f_Lachnospiraceae; g_Blautia; s__                    |
| X577478ea5568aa13923682d09991f152 | 7.29E-05   | k_Bacteria; p_Actinobacteria; c_Coriobacteriia; o_Coriobacteriales; f_Coriobacteriaceae; g_; s__              |
| X1fd72c9032729af96baca77cce0d67d5 | 7.29E-05   | k_Bacteria; p_Actinobacteria; c_Coriobacteriia; o_Coriobacteriales; f_Coriobacteriaceae; g_; s__              |
| X0ff6f32a812d98d9bd46bb3c7a6294cc | 7.29E-05   | k_Bacteria; p_Actinobacteria; c_Coriobacteriia; o_Coriobacteriales; f_Coriobacteriaceae; g_Adlercreutzia; s__ |
| c0b1dbd7cff46a0e46798f6cf0b86c95  | 7.29E-05   | k_Bacteria; p_Bacteroidetes; c_Bacteroidia; o_Bacteroidales; f_Prevotellaceae; g_Prevotella; s_stercorea      |
| ff0c3058877b605f27f7558b773ee339  | 6.44E-05   | k_Bacteria; p_Spirochaetes; c_Spirochaetes; o_Sphaerochaetales; f_Sphaerochaetaceae; g_Sphaerochaeta; s__     |
| dc6b8f0e0f94076b835897991f6d4322  | 6.44E-05   | k_Bacteria; p_Spirochaetes; c_Spirochaetes; o_Sphaerochaetales; f_Sphaerochaetaceae; g_Sphaerochaeta; s__     |
| X03c51b5e257b8e286445b07fe1e7d80b | 6.44E-05   | k_Bacteria; p_Firmicutes; c_Clostridia; o_Clostridiales; f_Veillonellaceae; g_Dialister; s__                  |
| b707f86ae5986dda bf40a393b569d306 | 6.15E-06   | k_Bacteria; p_Firmicutes; c_Clostridia; o_Clostridiales; f_Lachnospiraceae; g_Anaerostipes; s__               |
| X288359d621a383c1e46f0c0418660242 | 1.49E-15   | k_Fungi; p_Ascomycota; c_Dothideomycetes; o_Botryosphaeriales; f_Botryosphaeriaceae; g_Lasiodiplodia          |
| a171d6b000917ac0e0a39cb0c8b2fc1b  | 6.35E-16   | k_Fungi; p_Ascomycota; c_Dothideomycetes; o_Botryosphaeriales; f_Botryosphaeriaceae; g_Lasiodiplodia          |
| X52cdc265412299f4b1520f751a1f185a | 3.99E-16   | k_Bacteria; p_Firmicutes; c_Clostridia; o_Clostridiales; f_Ruminococcaceae; g_Ruminococcus; s_flavofaciens    |

|                                   |          |                                                                                                                                    |
|-----------------------------------|----------|------------------------------------------------------------------------------------------------------------------------------------|
| c489d3e41cd4004902f023b3c0d96178  | 2.77E-16 | k_Bacteria; p_Actinobacteria                                                                                                       |
| bb045933c26289f69da94dc8214151da  | 2.77E-16 | k_Bacteria; p_Firmicutes; c_Erysipelotrichi; o_Erysipelotrichales; f_Erysipelotrichaceae; g_RFN20; s_                              |
| X31ac5d226982f55053457715c8fe524a | 2.77E-16 | k_Bacteria; p_Verrucomicrobia; c_Verruco-5; o_WCHB1-41; f_RFP12; g_; s_                                                            |
| X1b672a28fff72c4817820c82c8a63219 | 2.77E-16 | k_Bacteria; p_Firmicutes; c_Clostridia; o_Clostridiales; f_; g_; s_                                                                |
| c06720adb0fb0a25ca2dbd0facfc52d   | 2.77E-16 | k_Bacteria; p_Bacteroidetes; c_Bacteroidia; o_Bacteroidales; f_; g_; s_                                                            |
| X49653229f8c1f6c9149ee61ed1ba36db | 1.21E-16 | k_Bacteria; p_Proteobacteria; c_Betaproteobacteria; o_Burkholderiales                                                              |
| bf3912133bb98bb4d46d779886bb2c2   | 1.21E-16 | k_Bacteria; p_Firmicutes; c_Clostridia; o_Clostridiales; f_Ruminococcaceae; g_; s_                                                 |
| X67a27018f69d64ed3d51d08fa76e75aa | 1.21E-16 | k_Bacteria; p_Proteobacteria; c_Betaproteobacteria; o_Burkholderiales; f_Alcaligenaceae; g_Sutterella; s_                          |
| a915ba59510cd0721f007689db26287b  | 1.02E-16 | k_Fungi;p_unidentified;c_unidentified;o_unidentified;f_unidentified;g_unidentified;s_unidentified                                  |
| f8f3af87f13963b734bb2b2710cf37ee  | 4.12E-17 | k_Bacteria; p_Firmicutes; c_Clostridia; o_Clostridiales; f_Ruminococcaceae; g_; s_                                                 |
| a2f49b2ad0d2db2f52a7f4d435e45259  | 4.12E-17 | k_Fungi;p_Ascomycota;c_Dothideomycetes;o_Pleosporales                                                                              |
| X79751e6d6445f7bdb789b2b72df77205 | 3.78E-17 | k_Bacteria; p_Firmicutes; c_Clostridia; o_Clostridiales; f_; g_; s_                                                                |
| X68bdccd3d60e66e4154c1d015155cb69 | 3.78E-17 | k_Bacteria; p_Bacteroidetes; c_Bacteroidia; o_Bacteroidales; f_RF16; g_; s_                                                        |
| X22ec27b7367ce45e8ac8e9a944a038a1 | 2.27E-17 | k_Fungi;p_Ascomycota;c_Saccharomycetes;o_Saccharomycetales; f_Saccharomycetales_fam_Incertae_sedis;g_Candida;s_Candida_quercitrusa |
| f6d6ab0c61d1317105a443fbaf5b891   | 1.14E-17 | k_Bacteria; p_Firmicutes; c_Clostridia; o_Clostridiales; f_[Mogibacteriaceae]; g_; s_                                              |
| ff76b6c4fd74017ce052e8a84fb2d3a   | 1.14E-17 | k_Bacteria; p_Firmicutes; c_Clostridia; o_Clostridiales; f_Lachnospiraceae; g_; s_                                                 |

Supplementary Table2. Sheet9. Key taxa in USA-Human identified based on the network hub score.

| ASV                               | HubScore   | Taxa                                                                                                         |
|-----------------------------------|------------|--------------------------------------------------------------------------------------------------------------|
| X1c9ff9e2aeaeabc0df06f1e182022bb7 | 1          | k_Fungi;p_Ascomycota;c_Saccharomycetes;o_Saccharomycetales;f_Saccharomycetaceae;g_Saccharomyces              |
| X742e1f191223f58590661de80b9d6e3b | 0.14285714 | k_Bacteria; p_Bacteroidetes; c_Bacteroidia; o_Bacteroidales; f_Rikenellaceae; g_Alistipes; s_onderdonkii     |
| e335f74033bc634af43ee6baa84fa247  | 0.14285714 | k_Bacteria; p_Firmicutes; c_Clostridia; o_Clostridiales; f_Peptostreptococcaceae; g_; s_                     |
| b15193fce14759d1c06728933e044af6  | 0.14285714 | k_Bacteria; p_Bacteroidetes; c_Bacteroidia; o_Bacteroidales; f_Bacteroidaceae; g_Bacteroides; s_uniformis    |
| X1b9ab7ba8573cbfe5f1a9f59f0b38ff4 | 0.14285714 | k_Bacteria; p_Actinobacteria; c_Coriobacteriia; o_Coriobacteriales; f_Coriobacteriaceae; g_Adlercreutzia; s_ |
| X0a68ec564e278b0246c920ad7de41880 | 0.14285714 | k_Bacteria; p_Firmicutes; c_Clostridia; o_Clostridiales; f_Lachnospiraceae; g_Blautia; s_                    |
| X9e1f282914b07cd79711ce21e7cf4aff | 0.14285714 | k_Bacteria; p_Firmicutes; c_Clostridia; o_Clostridiales; f_Lachnospiraceae; g_Lachnospira; s_                |
| f4cc6e4932f507b33d1335d801f54563  | 0.14285714 | k_Bacteria; p_Firmicutes; c_Clostridia; o_Clostridiales; f_Lachnospiraceae; g_Dorea; s_formicigenerans       |

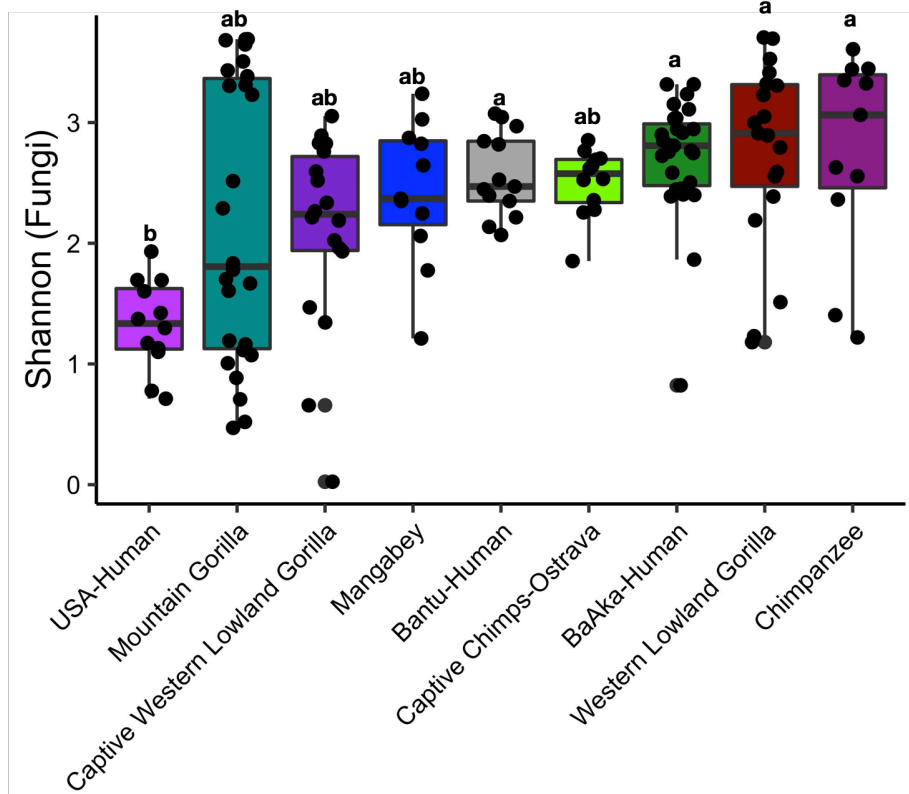

Supplementary Figure 1. Gut mycobiome differs based on subsistence strategies across different primates. Alpha diversity analysis showing lower fungal diversity in western humans as compared to other primate groups. Different letters denote significant differences according to FDR-adjusted Kruskal-Wallis tests.

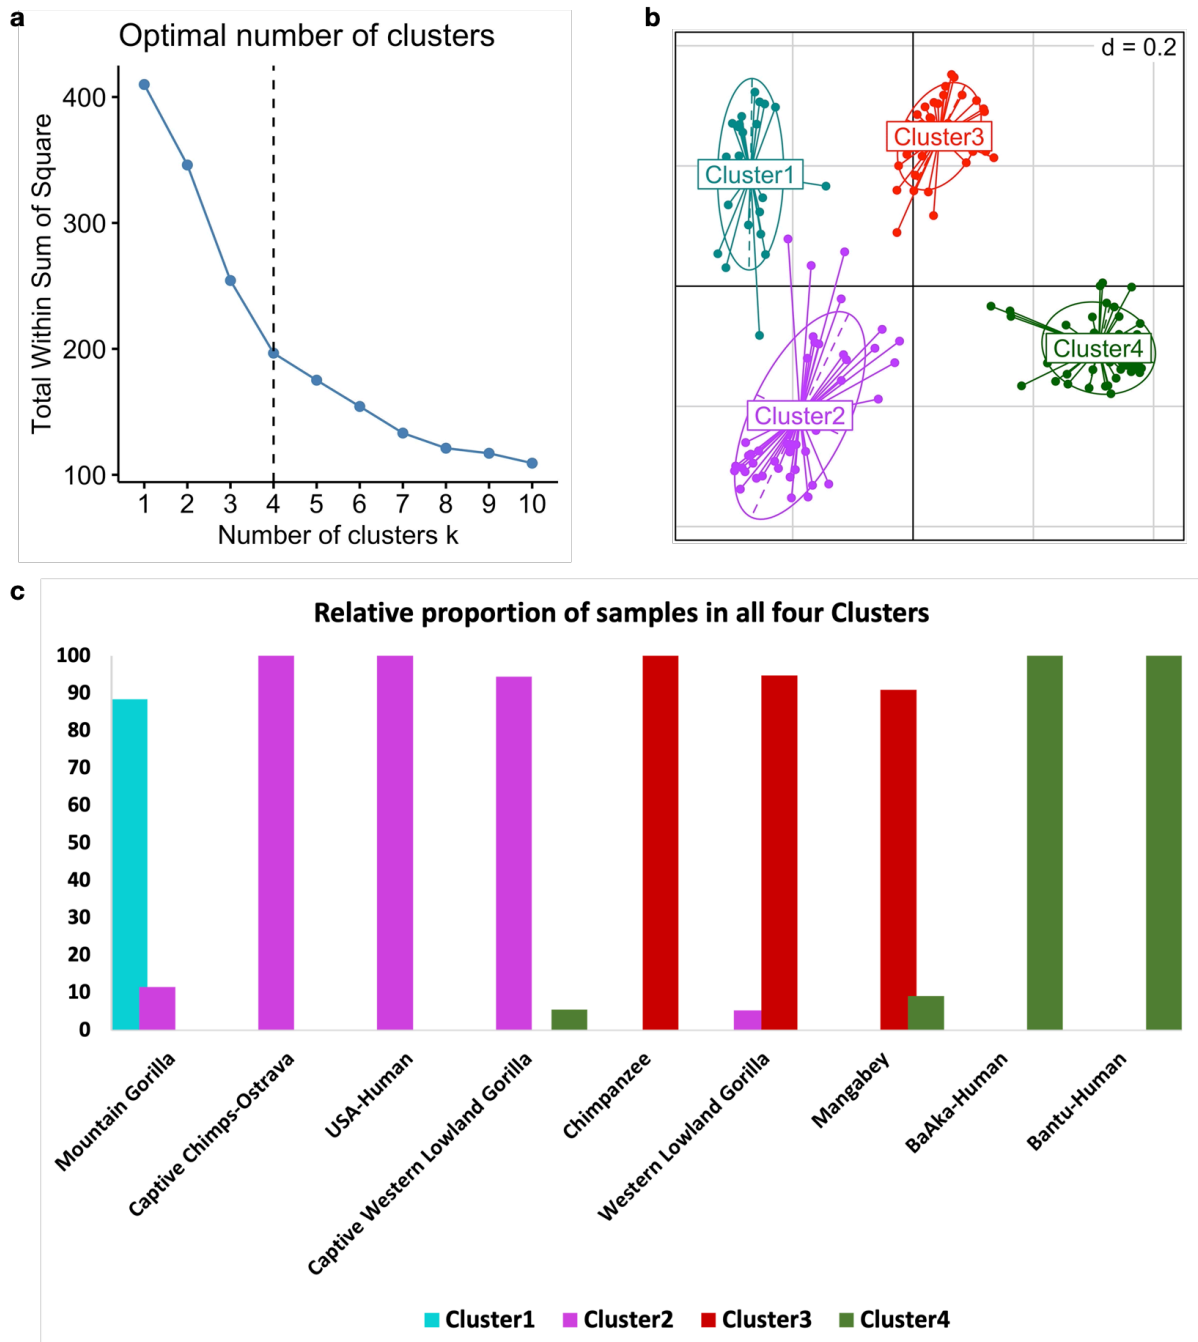

Supplementary Figure 2. Gut mycobiome community composition of different primates can be classified into four different clusters. **(a)** Partition around medoids (PAM) clustering analysis led to the identification of minimum four clusters based on reduction in sums of squares after  $k=4$ . **(b)** Bray-Curtis PCoA ordination showing the presence of four clusters classifying gut mycobiome community composition across different primate species. Each dot in the plot represents the fecal sample of a given primate and ellipses show the confidence intervals (95% standard errors) in multivariate space. **(c)** Proportion of individuals within each primate species classified into each of the four clusters shown in the bar plot.

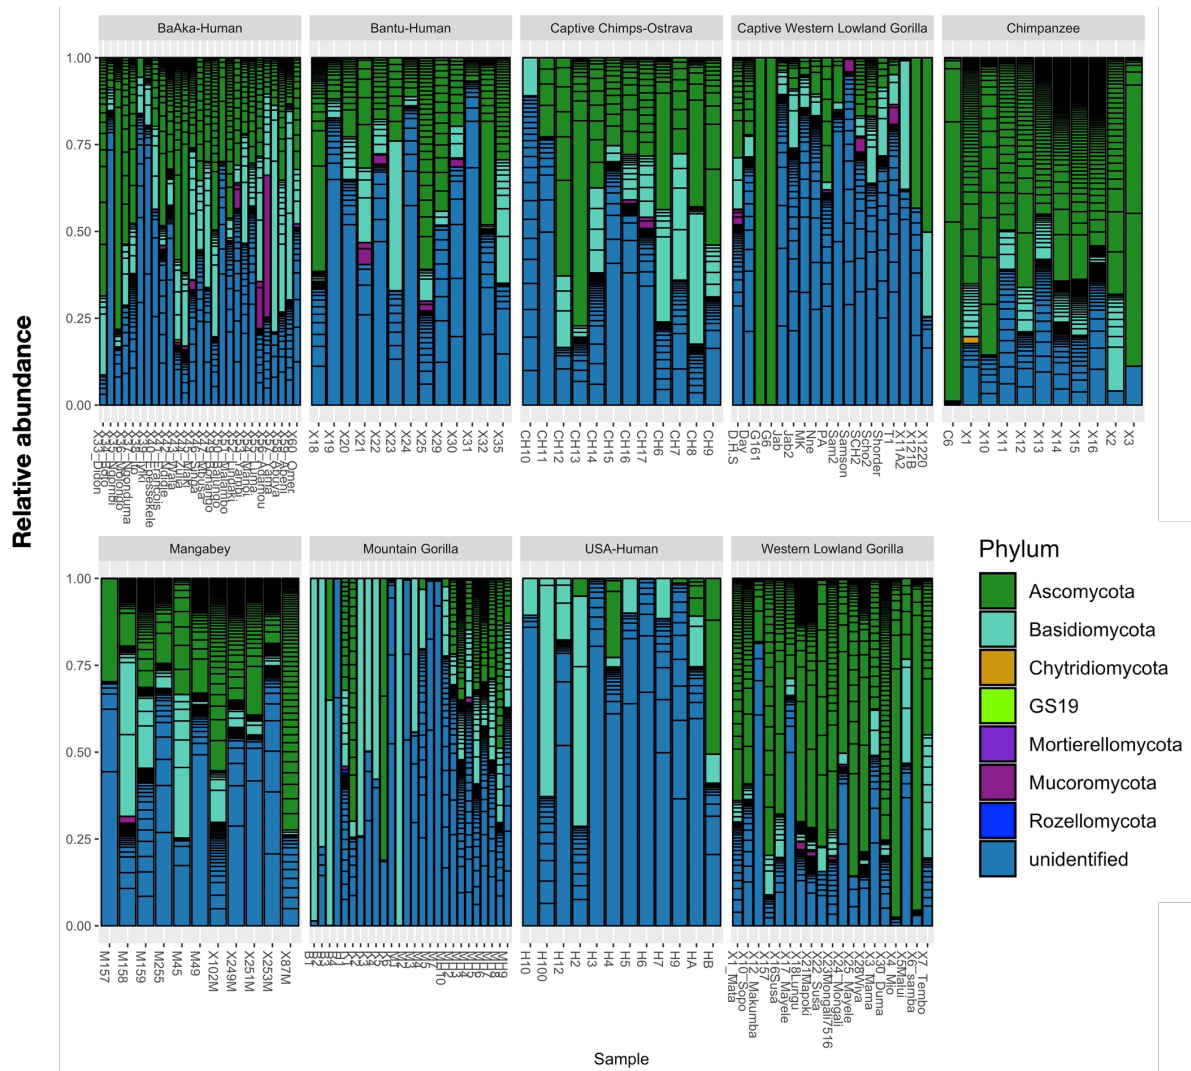

Supplementary Figure 3. Gut mycobiome community composition across different primate groups. Bar plots showing relative abundance of fungal phyla detected in each primate group.



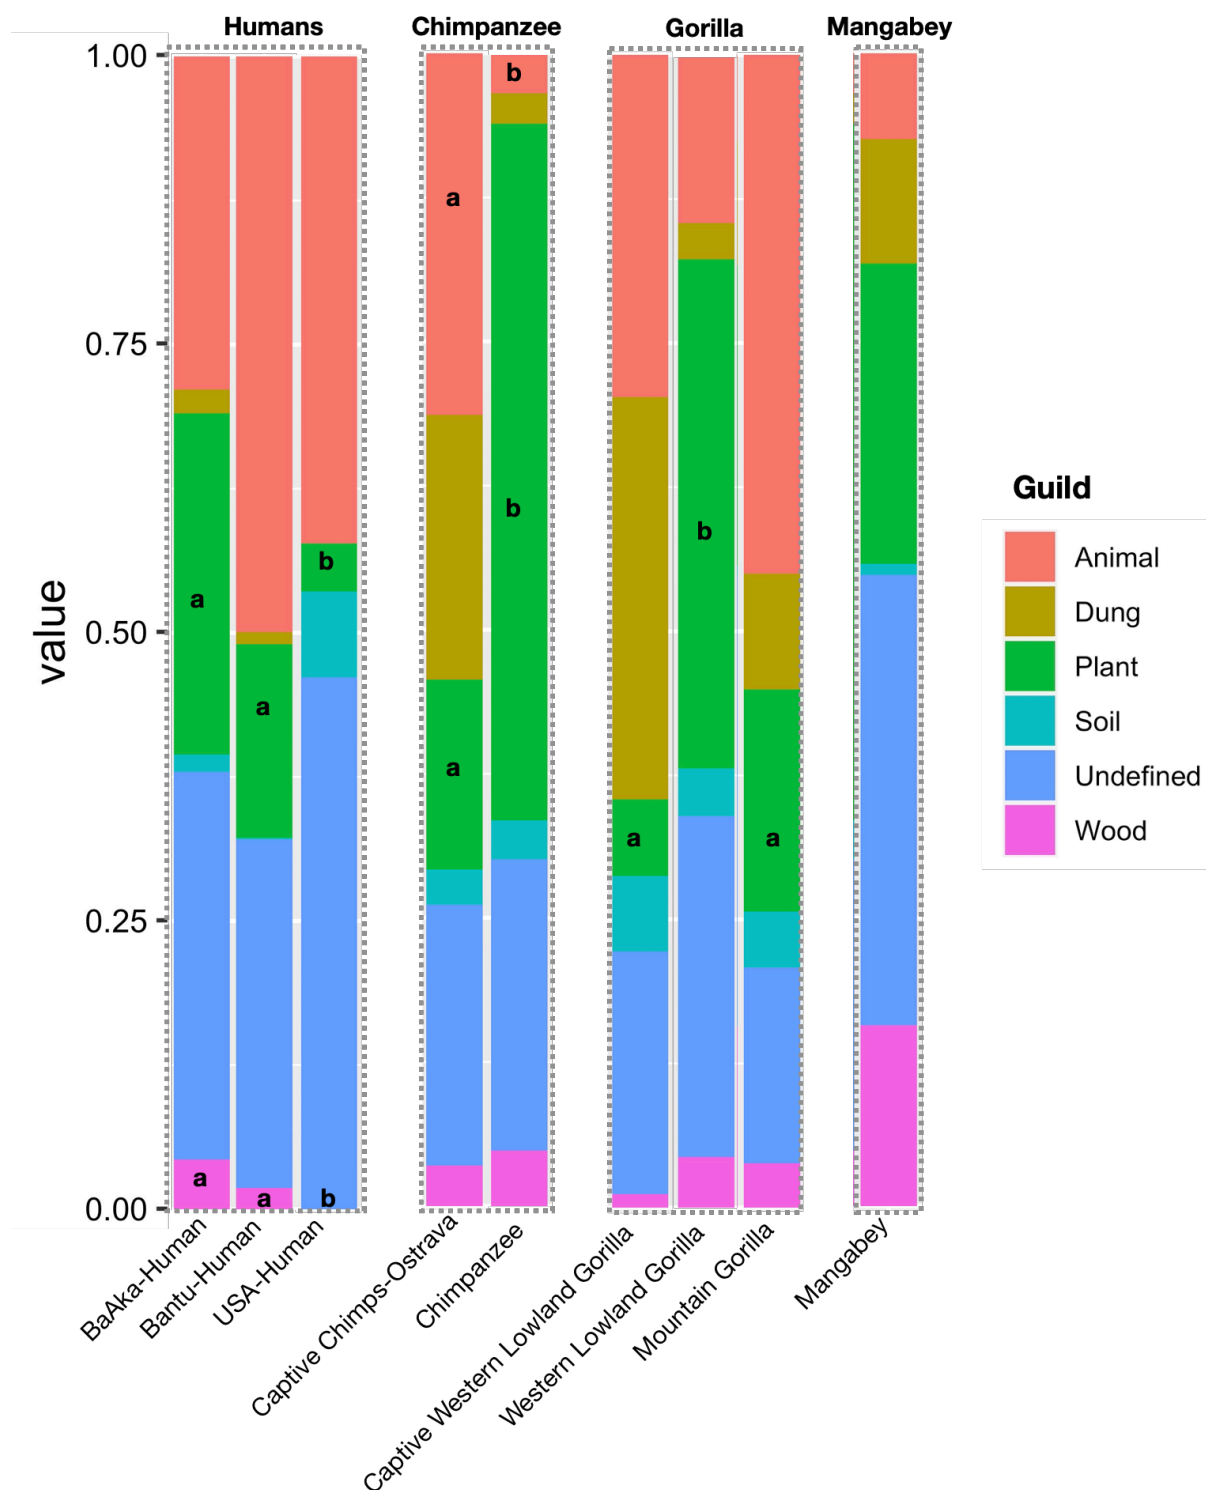

Supplementary Figure 4. Cumulative relative abundance of all fungal ASVs that can utilize similar types of resources (guild source). Relative distributions of guild source were detected from the FUNGuild assignments of fungal ASVs. Symbols highlight statistical differences (Kruskal-Wallis,  $p < 0.05$ ) in the distribution of guild source within each human, chimpanzee and gorilla population.

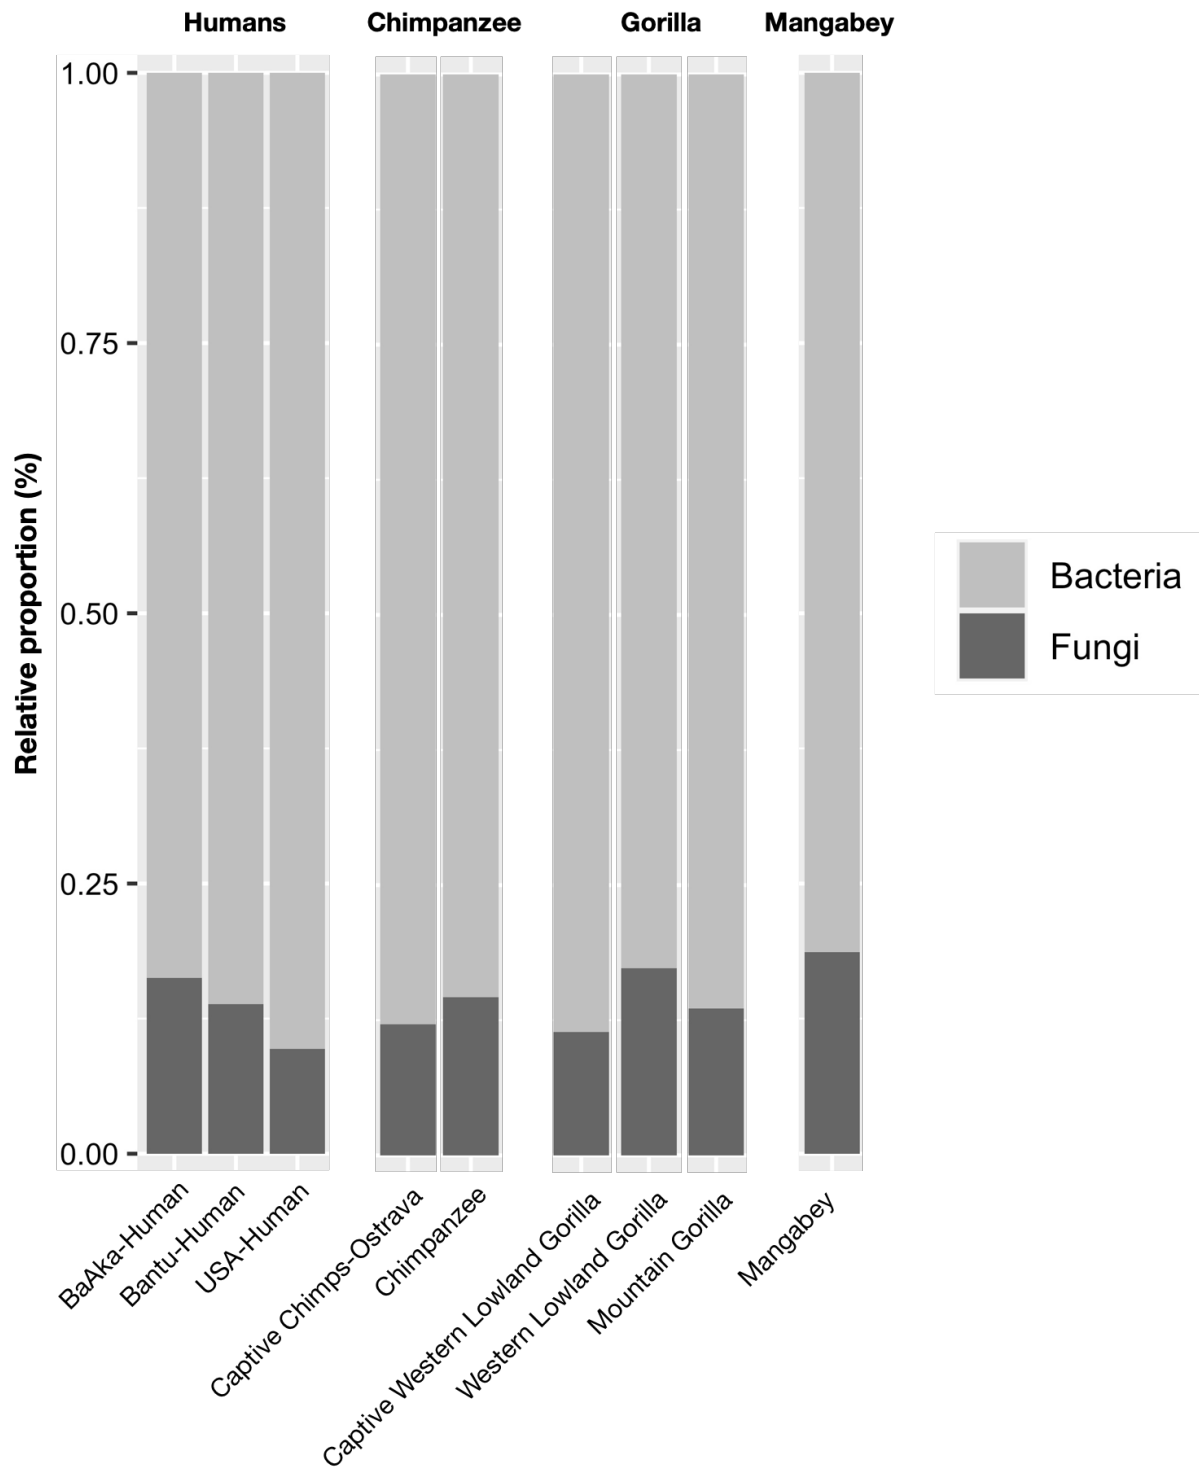

Supplementary Figure 5. Relative proportion of gut microbiome and bacteriome among different primate groups. Centered log-ratio (CLR) transformation was used on bacterial and fungal count data separately before merging and assessing the relative proportions. Bacteriome composition is always higher (~4 times, ratio=4:1) than microbiome irrespective of the primate host.

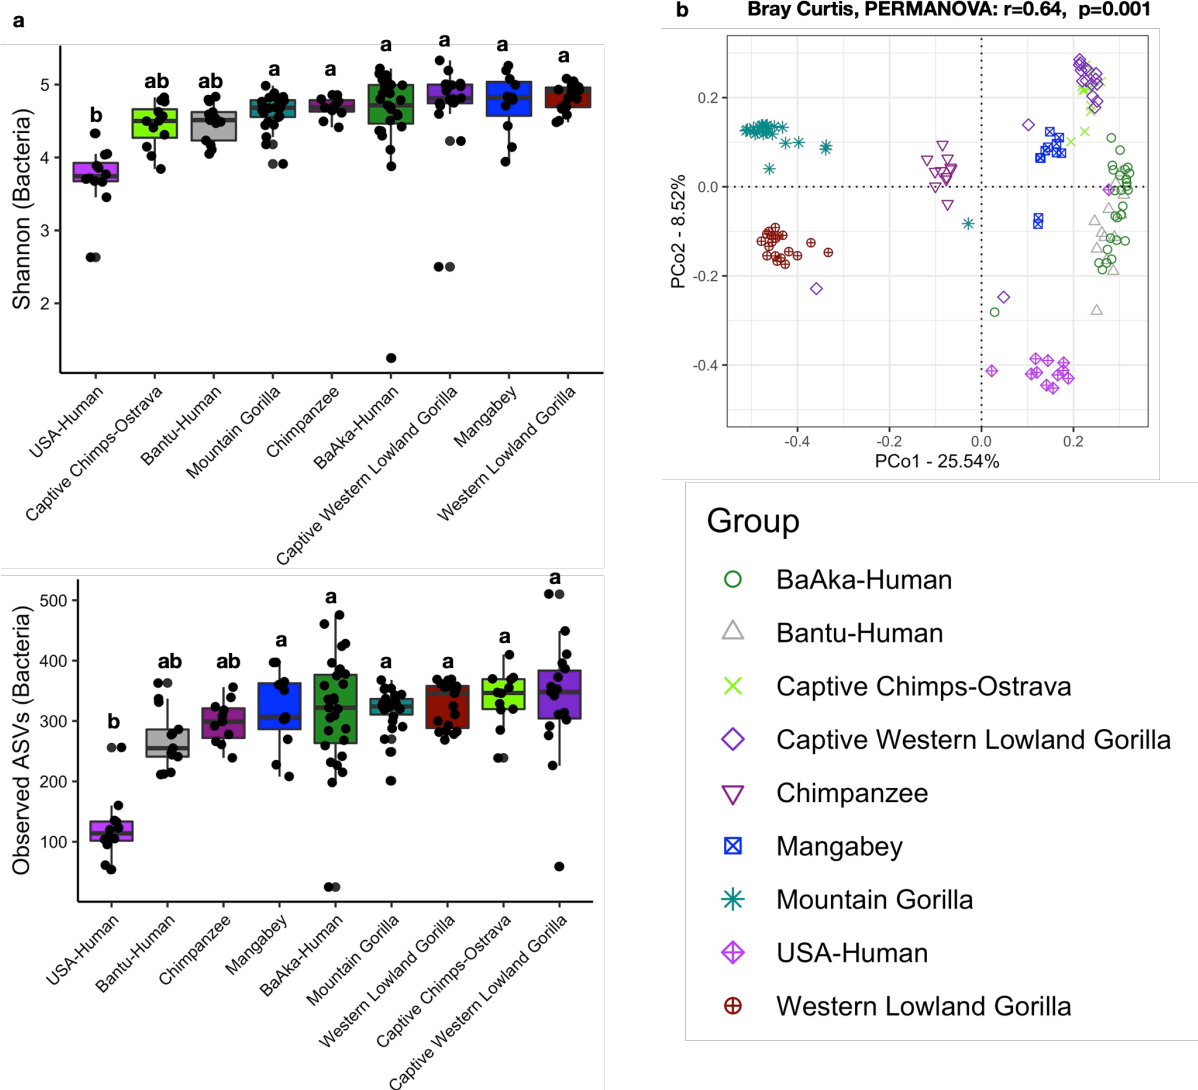

Supplementary Figure 6. Gut bacterial community composition differs based on subsistence strategies across different primates. **(a)** Alpha diversity analysis showing lower bacterial diversity and richness in western humans compared with other primate populations. **(b)** Principal coordinate analysis based on Bray-Curtis showing different bacterial community composition across different primate groups analyzed (PERMANOVA,  $R^2=0.53$ ,  $p=0.001$ , and  $R^2=0.64$ ,  $p=0.001$ ). Each symbol represents the fungal composition, at the ASV level, in the fecal samples of an individual primate species.

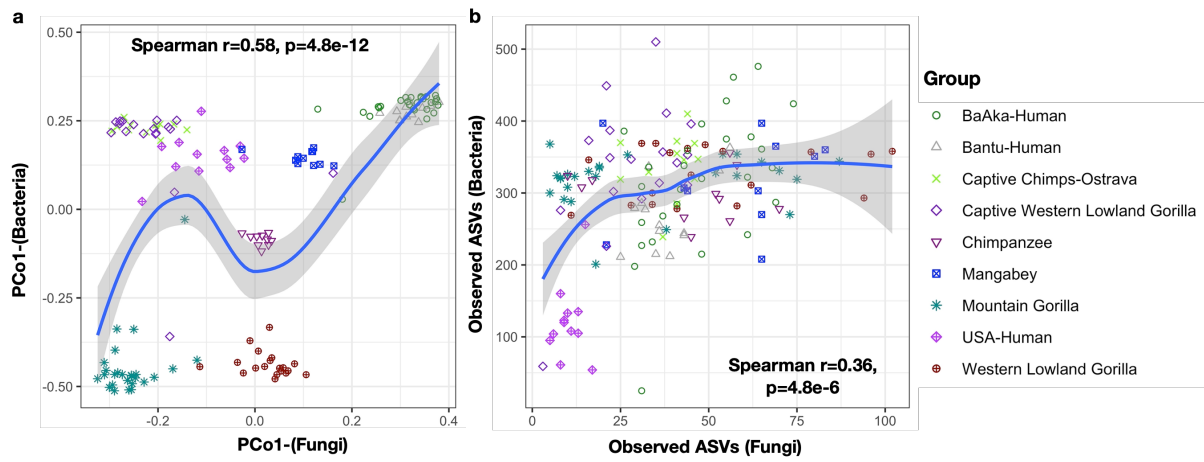

Supplementary Figure 7. Correspondence between gut bacteriome and mycobiome composition across different primates. **(a)** Correlation between ordination scores along PCo1 based on Bray-Curtis distances calculated on gut mycobiome and bacteriome composition, and **(b)** correlation between gut fungal and bacterial richness.

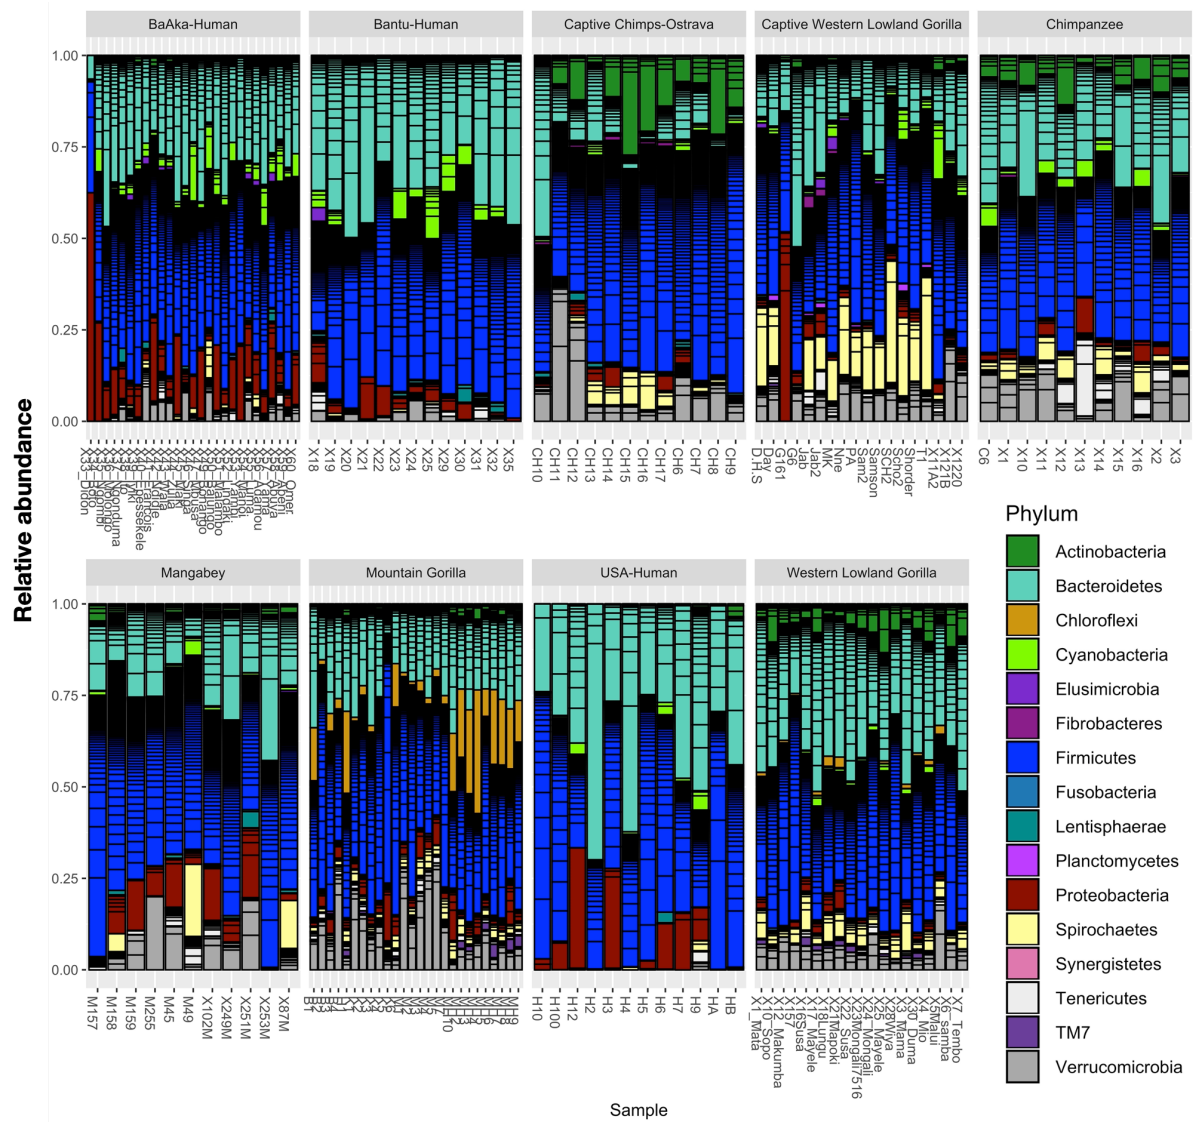

Supplementary Figure 8. Gut bacterial community composition across different primate groups. Bar plots showing relative abundance of bacterial phyla detected in each primate group.

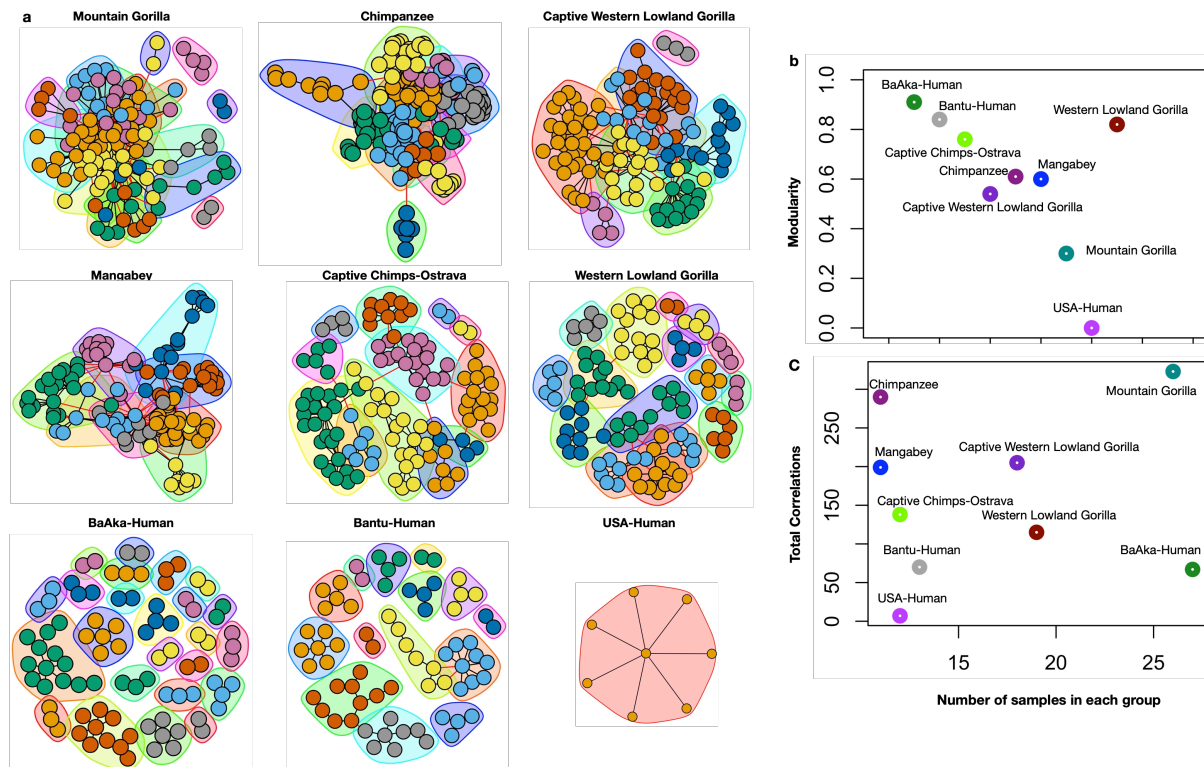

Supplementary Figure 9. Gut mycobiome-bacteriome co-occurrence network analysis across different primates. **(a)** Graphical representation of co-occurrence network modularity constructed using all significant correlations, **(b)** Network modularity of all primate groups where lower modularity results in dense connections (except of USA humans where only one node is connected). **(c)** association between number of samples and number of significant correlations between mycobiome and bacteriome obtained in each primate group.

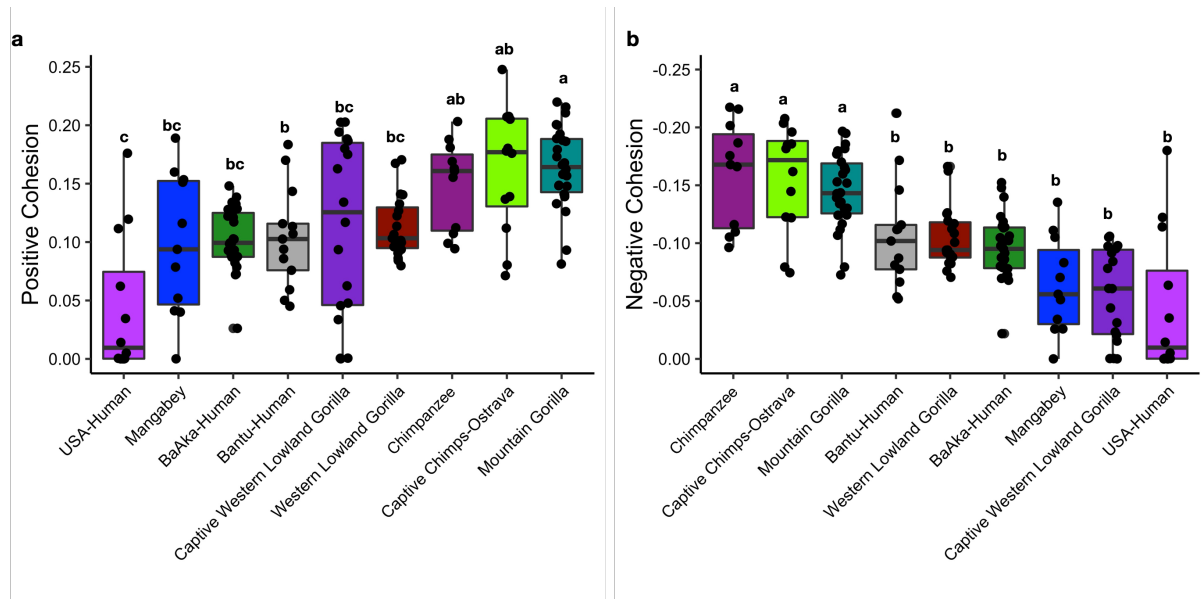

Supplementary Figure 10. Gut mycobiome-bacteriome co-occurrence network analysis across different primates. **(a)** positive cohesion **(b)** negative cohesion across different primate groups. Boxplots show inner quartiles and median values. Statistical significance was derived using Kruskal-Wallis multiple comparisons.

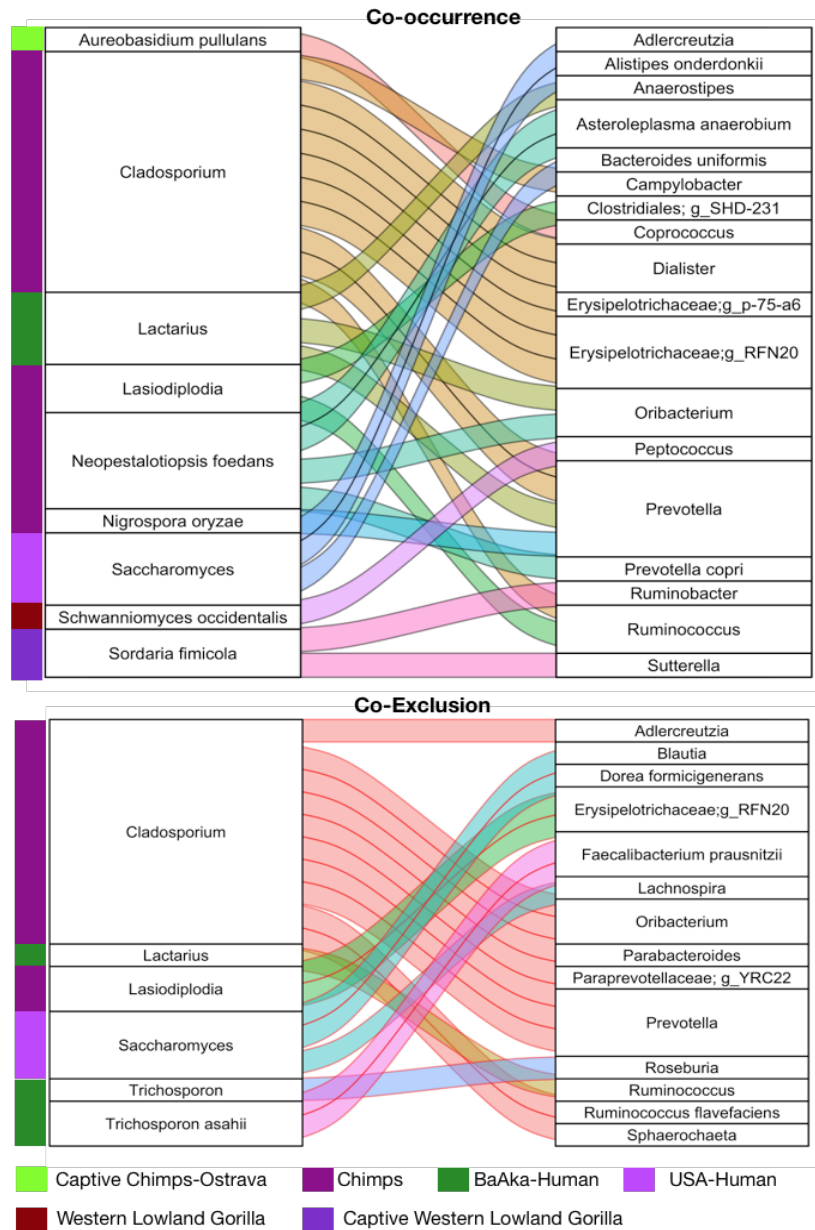

Supplementary Figure 11. Association between bacterial taxa and representative fungal genus of individual primate groups. Compositional correlations (co-occurrence and co-exclusion,  $r > 0.6$ ,  $q < 0.01$ ) were calculated between all significantly discriminating bacterial ASVs (species indicator analysis,  $p < 0.01$ ) and discriminant fungal genera.
